# Supplementary material for: Defining the progeria phenome
Source: publisher site journal article supplement (doi:10.18632/aging.205537), 2024-02-09
Supplement: Supplementary file [file aging-v16i3-205537-supplementary-material-SD1.pdf]

## SUPPLEMENTARY FIGURES

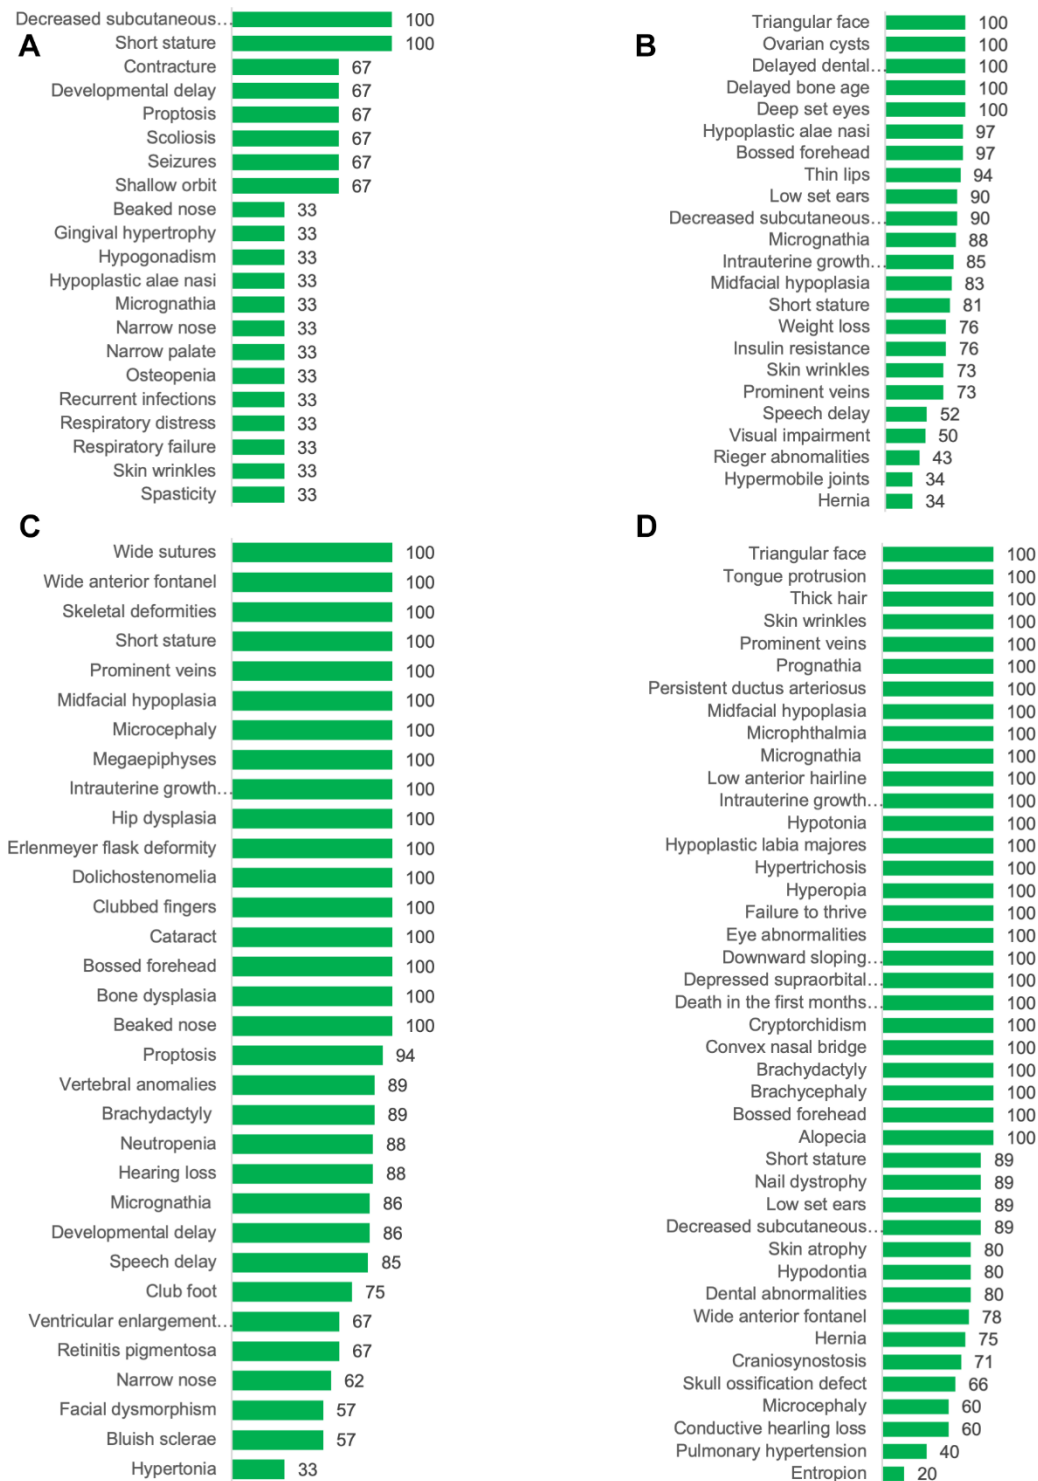

**Supplementary Figure 1. Identification and visualization of phenotypes in identified progeroid syndromes.** Bar charts showing the prevalence (%) of phenotypes for (A) Keppen-Lubinsky syndrome (KPLB), (B) SHORT syndrome, (C) Saul-Wilson syndrome and (D) Fontaine syndrome.

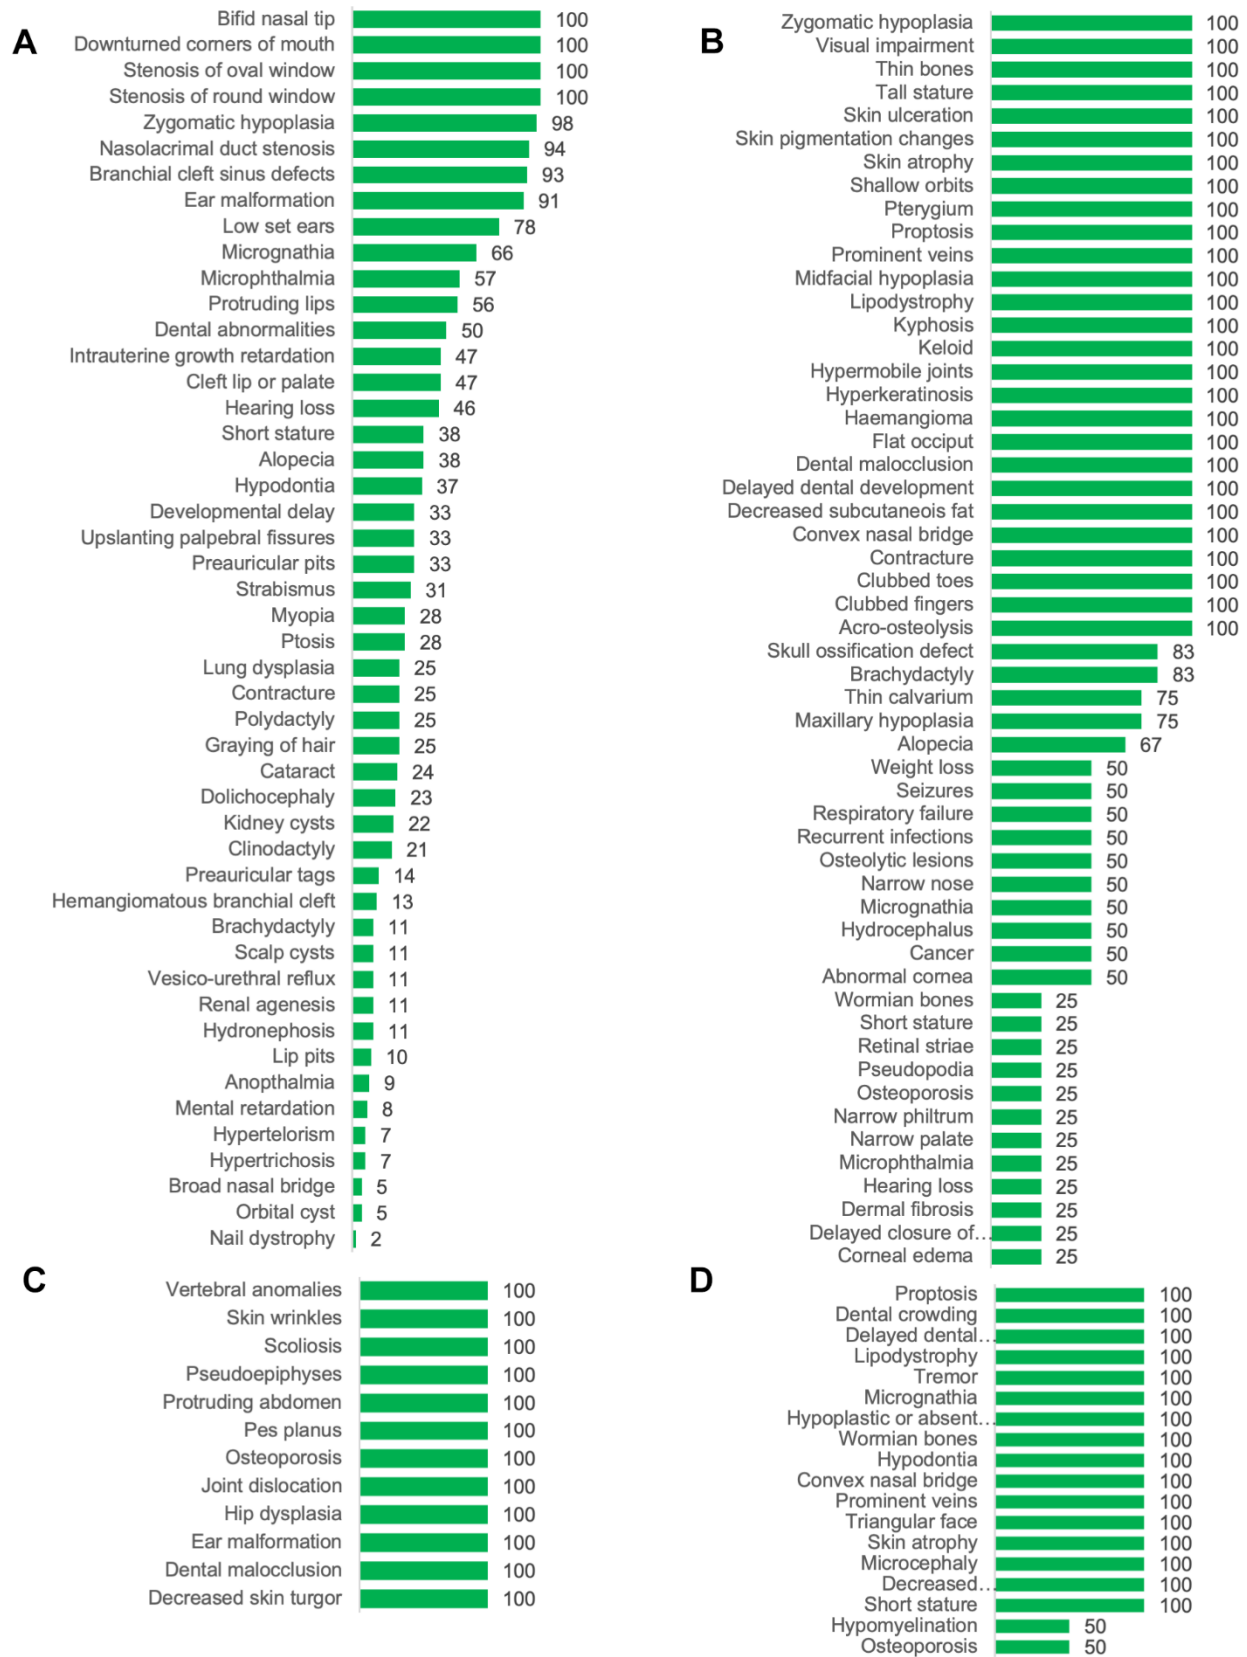

**Supplementary Figure 2. Identification and visualization of phenotypes in identified progeroid syndromes.** Bar charts showing the prevalence (%) of phenotypes for (A) Braciooculofacial syndrome (BOFS), (B) Penttinen syndrome, (C) Geroderma osteodysplasticum (GO), (D) Marbach-Rustad progeroid syndrome (MARUPS).

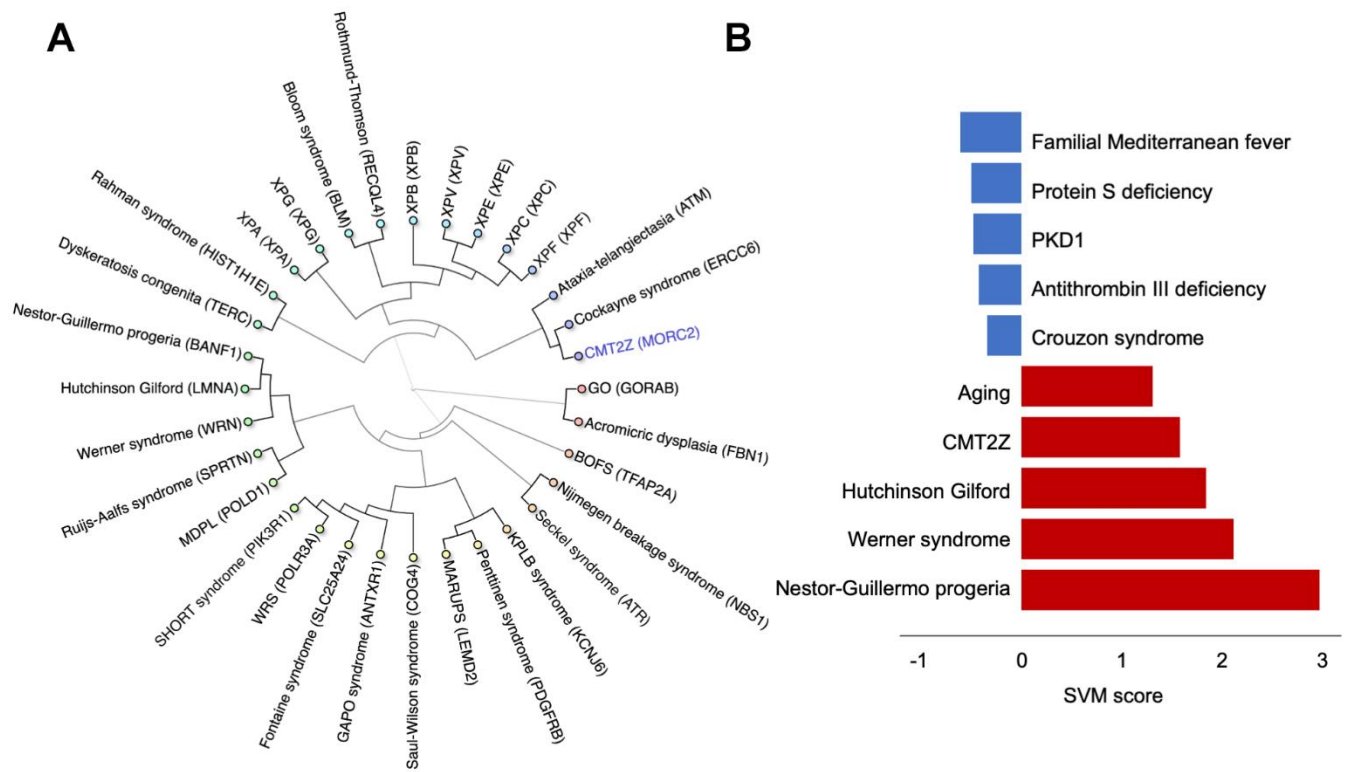

**Supplementary Figure 3. Charcot-Marie-Tooth type 2Z (CMT2Z) may be a premature aging disorder.** (A) Hierarchical clustering of premature aging diseases and CMT2Z. (B) Progeria SVM score of some premature aging diseases and CMT2Z.
