# Supplementary material for: Defining the progeria phenome
Source: Aging (Albany NY). 2024 Feb 9;16(3):2026–46. doi: 10.18632/aging.205537 (PMC10911340; doi:10.18632/aging.205537)
Supplement: Supplementary Table 1 [file aging-16-205537-s002.xls]

## Sheet: group_1_overlap_up_pathways
Supplementary Table 1. Gene expression pathway analysis of Cockayne syndrome, Xeroderma Pigmentosum group A, and ataxia-telangiectasia.
	Ataxia-telangiectasia	Cockayne syndrome	XPA	id	num
0	TRUE	TRUE	TRUE	Transcriptional activation of p53 responsive genes .R-HSA-69560	3		Inflammation
1	TRUE	TRUE	TRUE	Purine catabolism.R-HSA-74259	3		DNA damage response
2	TRUE	TRUE	TRUE	Sulfide oxidation to sulfate.R-HSA-1614517	3		Neurodegeneration
3	TRUE	TRUE	TRUE	Biosynthesis of D-series resolvins.R-HSA-9018676	3
4	TRUE	TRUE	TRUE	Biosynthesis of E-series 18(R)-resolvins.R-HSA-9023661	3
5	TRUE	TRUE	TRUE	Biosynthesis of E-series 18(S)-resolvins.R-HSA-9018896	3
6	TRUE	TRUE	TRUE	Biosynthesis of EPA-derived SPMs.R-HSA-9018679	3
7	TRUE	TRUE	TRUE	Biosynthesis of aspirin-triggered D-series resolvins.R-HSA-9020265	3
8	TRUE	TRUE	TRUE	RHO GTPases Activate NADPH Oxidases.R-HSA-5668599	3
9	TRUE	TRUE	TRUE	RUNX3 regulates BCL2L11 (BIM) transcription.R-HSA-8952158	3
10	TRUE	TRUE	TRUE	Carboxyterminal post-translational modifications of tubulin.R-HSA-8955332	3
11	TRUE	TRUE	TRUE	Peroxisomal protein import.R-HSA-9033241	3
12	TRUE	TRUE	TRUE	Rho GTPase cycle.R-HSA-194840	3
13	TRUE	TRUE	TRUE	Glycogen metabolism.R-HSA-8982491	3
14	TRUE	TRUE	TRUE	Glycogen breakdown (glycogenolysis).R-HSA-70221	3
15	TRUE	TRUE	TRUE	G1-S DNA Damage Checkpoints.R-HSA-69615	3
16	TRUE	TRUE	TRUE	Nef Mediated CD8 Down-regulation.R-HSA-182218	3
17	TRUE	TRUE	TRUE	Deregulated CDK5 triggers multiple neurodegenerative pathways in Alzheimer's disease models.R-HSA-8862803	3
18	TRUE	TRUE	TRUE	Cytosolic iron-sulfur cluster assembly.R-HSA-2564830	3
19	TRUE	TRUE	TRUE	Degradation of cysteine and homocysteine.R-HSA-1614558	3
20	TRUE	TRUE	TRUE	Nucleobase catabolism.R-HSA-8956319	3
21	TRUE	TRUE	TRUE	Binding and entry of HIV virion.R-HSA-173107	3
22	TRUE	TRUE	TRUE	Neurodegenerative Diseases.R-HSA-8863678	3
23	TRUE	TRUE	TRUE	p75NTR regulates axonogenesis.R-HSA-193697	3
24	TRUE	TRUE	TRUE	Ion influx-efflux at host-pathogen interface.R-HSA-6803544	3
25	TRUE	TRUE	TRUE	Protein localization.R-HSA-9609507	3
26	TRUE	TRUE	TRUE	Formation of selenosugars for excretion.R-HSA-2408499	3
27	TRUE	TRUE	TRUE	Transcriptional regulation by RUNX2.R-HSA-8878166	3
28	TRUE	TRUE	TRUE	Adenosine P1 receptors.R-HSA-417973	3
29	TRUE	TRUE	TRUE	Beta-catenin independent WNT signaling.R-HSA-3858494	3
30	TRUE	TRUE	TRUE	Metal ion SLC transporters.R-HSA-425410	3
31	TRUE	TRUE	TRUE	p53-Dependent G1 DNA Damage Response.R-HSA-69563	3
32	TRUE	TRUE	TRUE	Synthesis of Prostaglandins (PG) and Thromboxanes (TX).R-HSA-2162123	3
33	TRUE	TRUE	TRUE	Synthesis of PC.R-HSA-1483191	3
34	TRUE	TRUE	TRUE	Assembly Of The HIV Virion.R-HSA-175474	3
35	TRUE	TRUE	TRUE	p53-Dependent G1-S DNA damage checkpoint.R-HSA-69580	3
36	TRUE	TRUE	TRUE	Synthesis of 5-eicosatetraenoic acids.R-HSA-2142688	3
37	TRUE	TRUE	TRUE	Synthesis of 15-eicosatetraenoic acid derivatives.R-HSA-2142770	3
38	TRUE	TRUE	TRUE	Metabolism of ingested H2SeO4 and H2SeO3 into H2Se.R-HSA-2408550	3
39	TRUE	TRUE	TRUE	Synthesis of 12-eicosatetraenoic acid derivatives.R-HSA-2142712	3
40	TRUE	TRUE	TRUE	Transcriptional activation of cell cycle inhibitor p21 .R-HSA-69895	3
41	TRUE	TRUE	TRUE	Endosomal Sorting Complex Required For Transport (ESCRT).R-HSA-917729	3
42	FALSE	TRUE	TRUE	XBP1(S) activates chaperone genes.R-HSA-381038	2
43	FALSE	TRUE	TRUE	WNT ligand biogenesis and trafficking.R-HSA-3238698	2
44	FALSE	TRUE	TRUE	WNT5A-dependent internalization of FZD4.R-HSA-5099900	2
45	FALSE	TRUE	TRUE	Vpr-mediated induction of apoptosis by mitochondrial outer membrane permeabilization.R-HSA-180897	2
46	FALSE	TRUE	TRUE	WNT ligand secretion is abrogated by the PORCN inhibitor LGK974.R-HSA-5340573	2
47	FALSE	TRUE	TRUE	DAP12 signaling.R-HSA-2424491	2
48	FALSE	TRUE	TRUE	DAP12 interactions.R-HSA-2172127	2
49	FALSE	TRUE	TRUE	Degradation of GABA.R-HSA-916853	2
50	FALSE	TRUE	TRUE	Cytokine Signaling in Immune system.R-HSA-1280215	2
51	FALSE	TRUE	TRUE	Downstream signal transduction.R-HSA-186763	2
52	FALSE	TRUE	TRUE	VEGF ligand-receptor interactions.R-HSA-194313	2
53	FALSE	TRUE	TRUE	Degradation of the extracellular matrix.R-HSA-1474228	2
54	FALSE	TRUE	TRUE	Transcriptional regulation by the AP-2 (TFAP2) family of transcription factors.R-HSA-8864260	2
55	FALSE	TRUE	TRUE	Transport of gamma-carboxylated protein precursors from the endoplasmic reticulum to the Golgi apparatus.R-HSA-159763	2
56	FALSE	TRUE	TRUE	Extrinsic Pathway of Fibrin Clot Formation.R-HSA-140834	2
57	FALSE	TRUE	TRUE	Extracellular matrix organization.R-HSA-1474244	2
58	FALSE	TRUE	TRUE	Erythropoietin activates Phospholipase C gamma (PLCG).R-HSA-9027277	2
59	FALSE	TRUE	TRUE	Endosomal-Vacuolar pathway.R-HSA-1236977	2
60	FALSE	TRUE	TRUE	Elevation of cytosolic Ca2+ levels.R-HSA-139853	2
61	FALSE	TRUE	TRUE	Transport of small molecules.R-HSA-382551	2
62	FALSE	TRUE	TRUE	ERK-MAPK targets.R-HSA-198753	2
63	FALSE	TRUE	TRUE	ER-Phagosome pathway.R-HSA-1236974	2
64	FALSE	TRUE	TRUE	Triglyceride metabolism.R-HSA-8979227	2
65	FALSE	TRUE	TRUE	Complement cascade.R-HSA-166658	2
66	FALSE	TRUE	TRUE	Type I hemidesmosome assembly.R-HSA-446107	2
67	FALSE	TRUE	TRUE	Diseases of Immune System.R-HSA-5260271	2
68	FALSE	TRUE	TRUE	Diseases associated with the TLR signaling cascade.R-HSA-5602358	2
69	FALSE	TRUE	TRUE	Unfolded Protein Response (UPR).R-HSA-381119	2
70	FALSE	TRUE	TRUE	VEGF binds to VEGFR leading to receptor dimerization.R-HSA-195399	2
71	FALSE	TRUE	TRUE	Constitutive Signaling by NOTCH1 HD Domain Mutants.R-HSA-2691232	2
72	FALSE	TRUE	TRUE	Cell-cell junction organization.R-HSA-421270	2
73	FALSE	TRUE	TRUE	Collagen formation.R-HSA-1474290	2
74	FALSE	TRUE	TRUE	RUNX2 regulates genes involved in differentiation of myeloid cells.R-HSA-8941333	2
75	FALSE	TRUE	TRUE	Advanced glycosylation endproduct receptor signaling.R-HSA-879415	2
76	FALSE	TRUE	TRUE	Adherens junctions interactions.R-HSA-418990	2
77	FALSE	TRUE	TRUE	Activation of gene expression by SREBF (SREBP).R-HSA-2426168	2
78	FALSE	TRUE	TRUE	Activation of Matrix Metalloproteinases.R-HSA-1592389	2
79	FALSE	TRUE	TRUE	Activation of C3 and C5.R-HSA-174577	2
80	FALSE	TRUE	TRUE	Activated NTRK3 signals through PLCG1.R-HSA-9034793	2
81	FALSE	TRUE	TRUE	Activated NOTCH1 Transmits Signal to the Nucleus.R-HSA-2122948	2
82	FALSE	TRUE	TRUE	ALKBH2 mediated reversal of alkylation damage.R-HSA-112122	2
83	TRUE	FALSE	TRUE	mitochondrial fatty acid beta-oxidation of unsaturated fatty acids.R-HSA-77288	2
84	FALSE	TRUE	TRUE	Antigen processing-Cross presentation.R-HSA-1236975	2
85	TRUE	FALSE	TRUE	Vitamins B6 activation to pyridoxal phosphate.R-HSA-964975	2
86	TRUE	FALSE	TRUE	Vif-mediated degradation of APOBEC3G.R-HSA-180585	2
87	TRUE	TRUE	FALSE	Vasopressin-like receptors.R-HSA-388479	2
88	TRUE	FALSE	TRUE	Vasopressin regulates renal water homeostasis via Aquaporins.R-HSA-432040	2
89	TRUE	FALSE	TRUE	Urea cycle.R-HSA-70635	2
90	TRUE	FALSE	TRUE	Unwinding of DNA.R-HSA-176974	2
91	TRUE	FALSE	TRUE	Uncoating of the HIV Virion.R-HSA-162585	2
92	TRUE	TRUE	FALSE	Ubiquinol biosynthesis.R-HSA-2142789	2
93	FALSE	TRUE	TRUE	Alternative complement activation.R-HSA-173736	2
94	FALSE	TRUE	TRUE	Assembly of collagen fibrils and other multimeric structures.R-HSA-2022090	2
95	FALSE	TRUE	TRUE	Collagen chain trimerization.R-HSA-8948216	2
96	FALSE	TRUE	TRUE	Cell-Cell communication.R-HSA-1500931	2
97	FALSE	TRUE	TRUE	Collagen biosynthesis and modifying enzymes.R-HSA-1650814	2
98	FALSE	TRUE	TRUE	Chylomicron clearance.R-HSA-8964026	2
99	FALSE	TRUE	TRUE	p75 NTR receptor-mediated signalling.R-HSA-193704	2
100	FALSE	TRUE	TRUE	Cholesterol biosynthesis.R-HSA-191273	2
101	FALSE	TRUE	TRUE	p75NTR signals via NF-kB.R-HSA-193639	2
102	FALSE	TRUE	TRUE	t(4
103	FALSE	TRUE	TRUE	Cellular hexose transport.R-HSA-189200	2
104	FALSE	TRUE	TRUE	Formation of annular gap junctions.R-HSA-196025	2
105	FALSE	TRUE	TRUE	Cell recruitment (pro-inflammatory response).R-HSA-9664424	2
106	FALSE	TRUE	TRUE	Axonal growth stimulation.R-HSA-209563	2
107	FALSE	TRUE	TRUE	Cell junction organization.R-HSA-446728	2
108	FALSE	TRUE	TRUE	Cell death signalling via NRAGE, NRIF and NADE.R-HSA-204998	2
109	FALSE	TRUE	TRUE	Caspase-mediated cleavage of cytoskeletal proteins.R-HSA-264870	2
110	FALSE	TRUE	TRUE	Caspase activation via Dependence Receptors in the absence of ligand.R-HSA-418889	2
111	FALSE	TRUE	TRUE	CRMPs in Sema3A signaling.R-HSA-399956	2
112	FALSE	TRUE	TRUE	Butyrophilin (BTN) family interactions.R-HSA-8851680	2
113	FALSE	TRUE	TRUE	Biosynthesis of specialized proresolving mediators (SPMs).R-HSA-9018678	2
114	FALSE	TRUE	TRUE	Biosynthesis of DHA-derived SPMs.R-HSA-9018677	2
115	FALSE	TRUE	TRUE	Formation of Fibrin Clot (Clotting Cascade).R-HSA-140877	2
116	FALSE	TRUE	TRUE	Gamma carboxylation, hypusine formation and arylsulfatase activation.R-HSA-163841	2
117	FALSE	TRUE	TRUE	Formation of the beta-catenin:TCF transactivating complex.R-HSA-201722	2
118	FALSE	TRUE	TRUE	Nef-mediates down modulation of cell surface receptors by recruiting them to clathrin adapters.R-HSA-164938	2
119	FALSE	TRUE	TRUE	Response to elevated platelet cytosolic Ca2+.R-HSA-76005	2
120	FALSE	TRUE	TRUE	Response to metal ions.R-HSA-5660526	2
121	FALSE	TRUE	TRUE	O-glycosylation of TSR domain-containing proteins.R-HSA-5173214	2
122	FALSE	TRUE	TRUE	Nuclear signaling by ERBB4.R-HSA-1251985	2
123	FALSE	TRUE	TRUE	Nuclear Events (kinase and transcription factor activation).R-HSA-198725	2
124	FALSE	TRUE	TRUE	Nitric oxide stimulates guanylate cyclase.R-HSA-392154	2
125	FALSE	TRUE	TRUE	Neutrophil degranulation.R-HSA-6798695	2
126	FALSE	TRUE	TRUE	SEMA3A-Plexin repulsion signaling by inhibiting Integrin adhesion.R-HSA-399955	2
127	FALSE	TRUE	TRUE	Negative regulation of the PI3K-AKT network.R-HSA-199418	2
128	FALSE	TRUE	TRUE	Nef Mediated CD4 Down-regulation.R-HSA-167590	2
129	FALSE	TRUE	TRUE	Removal of aminoterminal propeptides from gamma-carboxylated proteins.R-HSA-159782	2
130	FALSE	TRUE	TRUE	NTF3 activates NTRK3 signaling.R-HSA-9034013	2
131	FALSE	TRUE	TRUE	NRAGE signals death through JNK.R-HSA-193648	2
132	FALSE	TRUE	TRUE	NR1H2 & NR1H3 regulate gene expression to limit cholesterol uptake .R-HSA-9031525	2
133	FALSE	TRUE	TRUE	NR1H2 & NR1H3 regulate gene expression linked to triglyceride lipolysis in adipose.R-HSA-9031528	2
134	FALSE	TRUE	TRUE	NR1H2 & NR1H3 regulate gene expression linked to lipogenesis.R-HSA-9029558	2
135	FALSE	TRUE	TRUE	NOTCH4 Activation and Transmission of Signal to the Nucleus.R-HSA-9013700	2
136	FALSE	TRUE	TRUE	NOTCH3 Activation and Transmission of Signal to the Nucleus.R-HSA-9013507	2
137	FALSE	TRUE	TRUE	NOTCH2 Activation and Transmission of Signal to the Nucleus.R-HSA-2979096	2
138	FALSE	TRUE	TRUE	STAT6-mediated induction of chemokines.R-HSA-3249367	2
139	FALSE	TRUE	TRUE	PCP-CE pathway.R-HSA-4086400	2
140	FALSE	TRUE	TRUE	PI5P, PP2A and IER3 Regulate PI3K-AKT Signaling.R-HSA-6811558	2
141	FALSE	TRUE	TRUE	SUMOylation of immune response proteins.R-HSA-4755510	2
142	FALSE	TRUE	TRUE	Purinergic signaling in leishmaniasis infection.R-HSA-9660826	2
143	FALSE	TRUE	TRUE	RUNX2 regulates chondrocyte maturation.R-HSA-8941284	2
144	FALSE	TRUE	TRUE	RUNX2 regulates bone development.R-HSA-8941326	2
145	FALSE	TRUE	TRUE	RUNX2 regulates osteoblast differentiation.R-HSA-8940973	2
146	FALSE	TRUE	TRUE	RUNX3 regulates CDKN1A transcription.R-HSA-8941855	2
147	FALSE	TRUE	TRUE	RUNX3 regulates RUNX1-mediated transcription.R-HSA-8951911	2
148	FALSE	TRUE	TRUE	ROS and RNS production in phagocytes.R-HSA-1222556	2
149	FALSE	TRUE	TRUE	RHO GTPases activate CIT.R-HSA-5625900	2
150	FALSE	TRUE	TRUE	RHO GTPases Activate Rhotekin and Rhophilins.R-HSA-5666185	2
151	FALSE	TRUE	TRUE	Regulated proteolysis of p75NTR.R-HSA-193692	2
152	FALSE	TRUE	TRUE	Regulation of Complement cascade.R-HSA-977606	2
153	FALSE	TRUE	TRUE	PINK1-PRKN Mediated Mitophagy.R-HSA-5205685	2
154	FALSE	TRUE	TRUE	Protein methylation.R-HSA-8876725	2
155	FALSE	TRUE	TRUE	Post-translational protein phosphorylation.R-HSA-8957275	2
156	FALSE	TRUE	TRUE	Post-chaperonin tubulin folding pathway.R-HSA-389977	2
157	FALSE	TRUE	TRUE	Platelet degranulation .R-HSA-114608	2
158	FALSE	TRUE	TRUE	Platelet calcium homeostasis.R-HSA-418360	2
159	FALSE	TRUE	TRUE	Plasma lipoprotein clearance.R-HSA-8964043	2
160	FALSE	TRUE	TRUE	Plasma lipoprotein assembly, remodeling, and clearance.R-HSA-174824	2
161	FALSE	TRUE	TRUE	Regulation of TP53 Activity through Phosphorylation.R-HSA-6804756	2
162	FALSE	TRUE	TRUE	PKMTs methylate histone lysines.R-HSA-3214841	2
163	FALSE	TRUE	TRUE	NF-kB is activated and signals survival.R-HSA-209560	2
164	FALSE	TRUE	TRUE	Mitophagy.R-HSA-5205647	2
165	FALSE	TRUE	TRUE	GLI proteins bind promoters of Hh responsive genes to promote transcription.R-HSA-5635851	2
166	FALSE	TRUE	TRUE	The activation of arylsulfatases.R-HSA-1663150	2
167	FALSE	TRUE	TRUE	IkBA variant leads to EDA-ID.R-HSA-5603029	2
168	FALSE	TRUE	TRUE	TFAP2 (AP-2) family regulates transcription of other transcription factors.R-HSA-8866906	2
169	FALSE	TRUE	TRUE	IRE1alpha activates chaperones.R-HSA-381070	2
170	FALSE	TRUE	TRUE	TFAP2A acts as a transcriptional repressor during retinoic acid induced cell differentiation.R-HSA-8869496	2
171	FALSE	TRUE	TRUE	TP53 Regulates Transcription of Caspase Activators and Caspases.R-HSA-6803207	2
172	FALSE	TRUE	TRUE	TP53 Regulates Transcription of Cell Death Genes.R-HSA-5633008	2
173	FALSE	TRUE	TRUE	TP53 Regulates Transcription of Genes Involved in G1 Cell Cycle Arrest.R-HSA-6804116	2
174	FALSE	TRUE	TRUE	The IPAF inflammasome.R-HSA-844623	2
175	FALSE	TRUE	TRUE	The NLRP3 inflammasome.R-HSA-844456	2
176	FALSE	TRUE	TRUE	Golgi Cisternae Pericentriolar Stack Reorganization.R-HSA-162658	2
177	FALSE	TRUE	TRUE	Inflammasomes.R-HSA-622312	2
178	FALSE	TRUE	TRUE	Glycosphingolipid metabolism.R-HSA-1660662	2
179	FALSE	TRUE	TRUE	Glycogen synthesis.R-HSA-3322077	2
180	FALSE	TRUE	TRUE	Glycerophospholipid biosynthesis.R-HSA-1483206	2
181	FALSE	TRUE	TRUE	Gap junction degradation.R-HSA-190873	2
182	FALSE	TRUE	TRUE	Gamma-carboxylation, transport, and amino-terminal cleavage of proteins.R-HSA-159854	2
183	FALSE	TRUE	TRUE	Gamma-carboxylation of protein precursors.R-HSA-159740	2
184	FALSE	TRUE	TRUE	Tolerance by Mtb to nitric oxide produced by macrophages.R-HSA-1222538	2
185	FALSE	TRUE	TRUE	GP1b-IX-V activation signalling.R-HSA-430116	2
186	FALSE	TRUE	TRUE	Trafficking and processing of endosomal TLR.R-HSA-1679131	2
187	FALSE	TRUE	TRUE	Immunoregulatory interactions between a Lymphoid and a non-Lymphoid cell.R-HSA-198933	2
188	FALSE	TRUE	TRUE	Influenza Virus Induced Apoptosis.R-HSA-168277	2
189	FALSE	TRUE	TRUE	Mitochondrial transcription termination.R-HSA-163316	2
190	FALSE	TRUE	TRUE	Signaling by NTRK3 (TRKC).R-HSA-9034015	2
191	FALSE	TRUE	TRUE	SUMOylation of transcription factors.R-HSA-3232118	2
192	FALSE	TRUE	TRUE	Metallothioneins bind metals.R-HSA-5661231	2
193	FALSE	TRUE	TRUE	Metabolism of vitamin K.R-HSA-6806664	2
194	FALSE	TRUE	TRUE	Meiotic recombination.R-HSA-912446	2
195	FALSE	TRUE	TRUE	Signaling by FGFR4 in disease.R-HSA-5655291	2
196	FALSE	TRUE	TRUE	Signaling by NOTCH1 HD Domain Mutants in Cancer.R-HSA-2691230	2
197	FALSE	TRUE	TRUE	Latent infection - Other responses of Mtb to phagocytosis.R-HSA-1222499	2
198	FALSE	TRUE	TRUE	Signaling by NOTCH3.R-HSA-9012852	2
199	FALSE	TRUE	TRUE	LDL clearance.R-HSA-8964038	2
200	FALSE	TRUE	TRUE	Signaling by PDGF.R-HSA-186797	2
201	FALSE	TRUE	TRUE	TFAP2 (AP-2) family regulates transcription of cell cycle factors.R-HSA-8866911	2
202	FALSE	TRUE	TRUE	Signaling by high-kinase activity BRAF mutants.R-HSA-6802948	2
203	FALSE	TRUE	TRUE	Ion channel transport.R-HSA-983712	2
204	FALSE	TRUE	TRUE	Interleukin-10 signaling.R-HSA-6783783	2
205	FALSE	TRUE	TRUE	Interleukin-1 processing.R-HSA-448706	2
206	FALSE	TRUE	TRUE	Interferon gamma signaling.R-HSA-877300	2
207	FALSE	TRUE	TRUE	Interferon alpha-beta signaling.R-HSA-909733	2
208	FALSE	TRUE	TRUE	Interferon Signaling.R-HSA-913531	2
209	FALSE	TRUE	TRUE	Interconversion of 2-oxoglutarate and 2-hydroxyglutarate.R-HSA-880009	2
210	FALSE	TRUE	TRUE	Initial triggering of complement.R-HSA-166663	2
211	FALSE	TRUE	TRUE	Glucose metabolism.R-HSA-70326	2
212	FALSE	TRUE	TRUE	RUNX2 regulates genes involved in cell migration.R-HSA-8941332	2
213	TRUE	FALSE	TRUE	Lagging Strand Synthesis.R-HSA-69186	2
214	TRUE	FALSE	TRUE	Prolonged ERK activation events.R-HSA-169893	2
215	TRUE	FALSE	TRUE	G-protein beta:gamma signalling.R-HSA-397795	2
216	TRUE	FALSE	TRUE	DNA strand elongation.R-HSA-69190	2
217	TRUE	TRUE	FALSE	RET signaling.R-HSA-8853659	2
218	TRUE	FALSE	TRUE	RUNX1 regulates transcription of genes involved in differentiation of myeloid cells.R-HSA-8939246	2
219	TRUE	FALSE	TRUE	Extension of Telomeres.R-HSA-180786	2
220	TRUE	TRUE	FALSE	RUNX3 regulates WNT signaling.R-HSA-8951430	2
221	TRUE	FALSE	TRUE	Recycling pathway of L1.R-HSA-437239	2
222	TRUE	FALSE	TRUE	MAPK1 (ERK2) activation.R-HSA-112411	2
223	TRUE	FALSE	TRUE	Cytosolic sulfonation of small molecules.R-HSA-156584	2
224	TRUE	FALSE	TRUE	Regulation of RUNX2 expression and activity.R-HSA-8939902	2
225	TRUE	FALSE	TRUE	Regulation of RUNX3 expression and activity.R-HSA-8941858	2
226	TRUE	FALSE	TRUE	Extra-nuclear estrogen signaling.R-HSA-9009391	2
227	TRUE	FALSE	TRUE	Regulation of cytoskeletal remodeling and cell spreading by IPP complex components.R-HSA-446388	2
228	TRUE	FALSE	TRUE	L1CAM interactions.R-HSA-373760	2
229	TRUE	FALSE	TRUE	Inwardly rectifying K+ channels.R-HSA-1296065	2
230	TRUE	TRUE	FALSE	Fanconi Anemia Pathway.R-HSA-6783310	2
231	TRUE	FALSE	TRUE	Fatty acid metabolism.R-HSA-8978868	2
232	TRUE	FALSE	TRUE	Removal of the Flap Intermediate from the C-strand.R-HSA-174437	2
233	TRUE	FALSE	TRUE	Cholesterol biosynthesis via lathosterol.R-HSA-6807062	2
234	TRUE	TRUE	FALSE	Cholesterol biosynthesis via desmosterol.R-HSA-6807047	2
235	TRUE	FALSE	TRUE	Removal of the Flap Intermediate.R-HSA-69166	2
236	TRUE	FALSE	TRUE	Inhibition of replication initiation of damaged DNA by RB1-E2F1.R-HSA-113501	2
237	TRUE	FALSE	TRUE	Inhibition of voltage gated Ca2+ channels via Gbeta-gamma subunits.R-HSA-997272	2
238	TRUE	TRUE	FALSE	Prostanoid ligand receptors.R-HSA-391908	2
239	TRUE	FALSE	TRUE	Processive synthesis on the lagging strand.R-HSA-69183	2
240	TRUE	FALSE	TRUE	Carnitine synthesis.R-HSA-71262	2
241	TRUE	FALSE	TRUE	Processive synthesis on the C-strand of the telomere.R-HSA-174414	2
242	TRUE	FALSE	TRUE	Mismatch repair (MMR) directed by MSH2:MSH6 (MutSalpha).R-HSA-5358565	2
243	TRUE	FALSE	TRUE	Mismatch repair (MMR) directed by MSH2:MSH3 (MutSbeta).R-HSA-5358606	2
244	TRUE	TRUE	FALSE	Early Phase of HIV Life Cycle.R-HSA-162594	2
245	TRUE	TRUE	FALSE	Eicosanoid ligand-binding receptors.R-HSA-391903	2
246	TRUE	FALSE	TRUE	Mismatch Repair.R-HSA-5358508	2
247	TRUE	TRUE	FALSE	NFG and proNGF binds to p75NTR.R-HSA-205017	2
248	TRUE	TRUE	FALSE	NTRK3 as a dependence receptor.R-HSA-9603505	2
249	TRUE	TRUE	FALSE	ER Quality Control Compartment (ERQC).R-HSA-901032	2
250	TRUE	FALSE	TRUE	Neddylation.R-HSA-8951664	2
251	TRUE	FALSE	TRUE	Nef mediated downregulation of MHC class I complex cell surface expression.R-HSA-164940	2
252	TRUE	FALSE	TRUE	Negative feedback regulation of MAPK pathway.R-HSA-5674499	2
253	TRUE	TRUE	FALSE	EPH-ephrin mediated repulsion of cells.R-HSA-3928665	2
254	TRUE	TRUE	FALSE	EPH-Ephrin signaling.R-HSA-2682334	2
255	TRUE	TRUE	FALSE	Downregulation of ERBB4 signaling.R-HSA-1253288	2
256	TRUE	FALSE	TRUE	Minus-strand DNA synthesis.R-HSA-164516	2
257	TRUE	FALSE	TRUE	OAS antiviral response.R-HSA-8983711	2
258	TRUE	FALSE	TRUE	Phosphate bond hydrolysis by NTPDase proteins.R-HSA-8850843	2
259	TRUE	FALSE	TRUE	Platelet activation, signaling and aggregation.R-HSA-76002	2
260	TRUE	FALSE	TRUE	Plus-strand DNA synthesis.R-HSA-164525	2
261	TRUE	FALSE	TRUE	Metabolism of nucleotides.R-HSA-15869	2
262	TRUE	FALSE	TRUE	Energy dependent regulation of mTOR by LKB1-AMPK.R-HSA-380972	2
263	TRUE	TRUE	FALSE	Membrane binding and targetting of GAG proteins.R-HSA-174490	2
264	TRUE	TRUE	FALSE	Prevention of phagosomal-lysosomal fusion.R-HSA-9636383	2
265	TRUE	FALSE	TRUE	Histidine catabolism.R-HSA-70921	2
266	TRUE	FALSE	TRUE	Mitochondrial Fatty Acid Beta-Oxidation.R-HSA-77289	2
267	TRUE	TRUE	FALSE	Ca2+ pathway.R-HSA-4086398	2
268	TRUE	FALSE	TRUE	Asymmetric localization of PCP proteins.R-HSA-4608870	2
269	TRUE	FALSE	TRUE	Synthesis of (16-20)-hydroxyeicosatetraenoic acids (HETE).R-HSA-2142816	2
270	TRUE	TRUE	FALSE	GRB7 events in ERBB2 signaling.R-HSA-1306955	2
271	TRUE	FALSE	TRUE	Aryl hydrocarbon receptor signalling.R-HSA-8937144	2
272	TRUE	FALSE	TRUE	Synthesis of DNA.R-HSA-69239	2
273	TRUE	FALSE	TRUE	Synthesis of active ubiquitin: roles of E1 and E2 enzymes.R-HSA-8866652	2
274	TRUE	FALSE	TRUE	GABA receptor activation.R-HSA-977443	2
275	TRUE	FALSE	TRUE	GABA B receptor activation.R-HSA-977444	2
276	TRUE	TRUE	FALSE	G2-M DNA replication checkpoint.R-HSA-69478	2
277	TRUE	FALSE	TRUE	Arachidonic acid metabolism.R-HSA-2142753	2
278	TRUE	FALSE	TRUE	Aquaporin-mediated transport.R-HSA-445717	2
279	TRUE	FALSE	TRUE	Activation of kainate receptors upon glutamate binding.R-HSA-451326	2
280	TRUE	FALSE	TRUE	Activation of anterior HOX genes in hindbrain development during early embryogenesis.R-HSA-5617472	2
281	TRUE	TRUE	FALSE	Activation of TRKA receptors.R-HSA-187015	2
282	TRUE	FALSE	TRUE	Activation of HOX genes during differentiation.R-HSA-5619507	2
283	TRUE	FALSE	TRUE	Activation of GABAB receptors.R-HSA-991365	2
284	TRUE	TRUE	FALSE	G2 Phase.R-HSA-68911	2
285	TRUE	FALSE	TRUE	Activation of G protein gated Potassium channels.R-HSA-1296041	2
286	TRUE	FALSE	TRUE	TNFR1-mediated ceramide production.R-HSA-5626978	2
287	TRUE	FALSE	TRUE	TNFs bind their physiological receptors.R-HSA-5669034	2
288	TRUE	TRUE	FALSE	Activation and oligomerization of BAK protein.R-HSA-111452	2
289	TRUE	FALSE	TRUE	Telomere C-strand (Lagging Strand) Synthesis.R-HSA-174417	2
290	TRUE	FALSE	TRUE	Termination of translesion DNA synthesis.R-HSA-5656169	2
291	TRUE	FALSE	TRUE	G protein gated Potassium channels.R-HSA-1296059	2
292	TRUE	FALSE	TRUE	APOBEC3G mediated resistance to HIV-1 infection.R-HSA-180689	2
293	TRUE	FALSE	TRUE	ADP signalling through P2Y purinoceptor 12.R-HSA-392170	2
294	TRUE	FALSE	TRUE	Frs2-mediated activation.R-HSA-170968	2
295	TRUE	TRUE	FALSE	Synthesis And Processing Of GAG, GAGPOL Polyproteins.R-HSA-174495	2
296	TRUE	FALSE	TRUE	Gap-filling DNA repair synthesis and ligation in GG-NER.R-HSA-5696397	2
297	TRUE	TRUE	FALSE	HS-GAG degradation.R-HSA-2024096	2
298	TRUE	FALSE	TRUE	Reverse Transcription of HIV RNA.R-HSA-162589	2
299	TRUE	TRUE	FALSE	Sealing of the nuclear envelope (NE) by ESCRT-III.R-HSA-9668328	2
300	TRUE	FALSE	TRUE	Signal transduction by L1.R-HSA-445144	2
301	TRUE	TRUE	FALSE	Signaling by Activin.R-HSA-1502540	2
302	TRUE	FALSE	TRUE	Signaling by NTRK1 (TRKA).R-HSA-187037	2
303	TRUE	FALSE	TRUE	G alpha (12-13) signalling events.R-HSA-416482	2
304	TRUE	FALSE	TRUE	Signaling by WNT in cancer.R-HSA-4791275	2
305	TRUE	FALSE	TRUE	Hemostasis.R-HSA-109582	2
306	TRUE	TRUE	FALSE	Binding of TCF-LEF:CTNNB1 to target gene promoters.R-HSA-4411364	2
307	TRUE	FALSE	TRUE	Biological oxidations.R-HSA-211859	2
308	TRUE	FALSE	TRUE	Glucagon-like Peptide-1 (GLP1) regulates insulin secretion.R-HSA-381676	2
309	TRUE	TRUE	FALSE	Axonal growth inhibition (RHOA activation).R-HSA-193634	2
310	TRUE	FALSE	TRUE	G beta:gamma signalling through CDC42.R-HSA-8964616	2
311	TRUE	FALSE	TRUE	BH3-only proteins associate with and inactivate anti-apoptotic BCL-2 members.R-HSA-111453	2
312	TRUE	FALSE	TRUE	Beta-oxidation of pristanoyl-CoA.R-HSA-389887	2
313	TRUE	FALSE	TRUE	Syndecan interactions.R-HSA-3000170	2
314	TRUE	FALSE	TRUE	G beta:gamma signalling through PLC beta.R-HSA-418217	2
315	TRUE	FALSE	TRUE	G beta:gamma signalling through BTK.R-HSA-8964315	2
316	FALSE	FALSE	TRUE	Mtb iron assimilation by chelation.R-HSA-1222449	1
317	FALSE	FALSE	TRUE	Mitochondrial protein import.R-HSA-1268020	1
318	FALSE	FALSE	TRUE	Muscle contraction.R-HSA-397014	1
319	FALSE	FALSE	TRUE	Mitochondrial iron-sulfur cluster biogenesis.R-HSA-1362409	1
320	FALSE	FALSE	TRUE	Mitochondrial translation.R-HSA-5368287	1
321	FALSE	FALSE	TRUE	Formation of Incision Complex in GG-NER.R-HSA-5696395	1
322	FALSE	FALSE	TRUE	Mitochondrial translation termination.R-HSA-5419276	1
323	FALSE	FALSE	TRUE	Formation of HIV-1 elongation complex containing HIV-1 Tat.R-HSA-167200	1
324	FALSE	FALSE	TRUE	Formation of RNA Pol II elongation complex .R-HSA-112382	1
325	FALSE	FALSE	TRUE	Mitochondrial translation initiation.R-HSA-5368286	1
326	FALSE	FALSE	TRUE	Formation of HIV elongation complex in the absence of HIV Tat.R-HSA-167152	1
327	FALSE	FALSE	TRUE	Mitotic Prophase.R-HSA-68875	1
328	FALSE	FALSE	TRUE	Mitochondrial translation elongation.R-HSA-5389840	1
329	FALSE	FALSE	TRUE	FCGR3A-mediated phagocytosis.R-HSA-9664422	1
330	FALSE	FALSE	TRUE	MyD88 cascade initiated on plasma membrane.R-HSA-975871	1
331	FALSE	FALSE	TRUE	Nef mediated downregulation of CD28 cell surface expression.R-HSA-164939	1
332	FALSE	FALSE	TRUE	NR1H3 & NR1H2 regulate gene expression linked to cholesterol transport and efflux.R-HSA-9029569	1
333	FALSE	FALSE	TRUE	Epigenetic regulation of gene expression.R-HSA-212165	1
334	FALSE	FALSE	TRUE	ESR-mediated signaling.R-HSA-8939211	1
335	FALSE	FALSE	TRUE	ERKs are inactivated.R-HSA-202670	1
336	FALSE	FALSE	TRUE	ERCC6 (CSB) and EHMT2 (G9a) positively regulate rRNA expression.R-HSA-427389	1
337	FALSE	FALSE	TRUE	NTRK2 activates RAC1.R-HSA-9032759	1
338	FALSE	FALSE	TRUE	ER to Golgi Anterograde Transport.R-HSA-199977	1
339	FALSE	FALSE	TRUE	EGFR interacts with phospholipase C-gamma.R-HSA-212718	1
340	FALSE	FALSE	TRUE	Nef and signal transduction.R-HSA-164944	1
341	FALSE	FALSE	TRUE	Negative epigenetic regulation of rRNA expression.R-HSA-5250941	1
342	FALSE	FALSE	TRUE	NR1H2 & NR1H3 regulate gene expression to control bile acid homeostasis.R-HSA-9623433	1
343	FALSE	FALSE	TRUE	EGFR downregulation.R-HSA-182971	1
344	FALSE	FALSE	TRUE	Negative regulation of MAPK pathway.R-HSA-5675221	1
345	FALSE	FALSE	TRUE	E3 ubiquitin ligases ubiquitinate target proteins.R-HSA-8866654	1
346	FALSE	FALSE	TRUE	Negative regulation of activity of TFAP2 (AP-2) family transcription factors.R-HSA-8866904	1
347	FALSE	FALSE	TRUE	Negative regulators of DDX58-IFIH1 signaling.R-HSA-936440	1
348	FALSE	FALSE	TRUE	Nephrin family interactions.R-HSA-373753	1
349	FALSE	FALSE	TRUE	Neurexins and neuroligins.R-HSA-6794361	1
350	FALSE	FALSE	TRUE	Neuronal System.R-HSA-112316	1
351	FALSE	FALSE	TRUE	Dual Incision in GG-NER.R-HSA-5696400	1
352	FALSE	FALSE	TRUE	NR1H2 and NR1H3-mediated signaling.R-HSA-9024446	1
353	FALSE	FALSE	TRUE	NR1H2 & NR1H3 regulate gene expression linked to gluconeogenesis .R-HSA-9632974	1
354	FALSE	FALSE	TRUE	MyD88 dependent cascade initiated on endosome.R-HSA-975155	1
355	FALSE	FALSE	TRUE	FOXO-mediated transcription of cell death genes.R-HSA-9614657	1
356	FALSE	FALSE	TRUE	MyD88-independent TLR4 cascade .R-HSA-166166	1
357	FALSE	FALSE	TRUE	MyD88:MAL(TIRAP) cascade initiated on plasma membrane.R-HSA-166058	1
358	FALSE	FALSE	TRUE	NF-kB activation through FADD-RIP-1 pathway mediated by caspase-8 and -10.R-HSA-933543	1
359	FALSE	FALSE	TRUE	Fcgamma receptor (FCGR) dependent phagocytosis.R-HSA-2029480	1
360	FALSE	FALSE	TRUE	NGF-stimulated transcription.R-HSA-9031628	1
361	FALSE	FALSE	TRUE	NIK-->noncanonical NF-kB signaling.R-HSA-5676590	1
362	FALSE	FALSE	TRUE	Fatty acids.R-HSA-211935	1
363	FALSE	FALSE	TRUE	FOXO-mediated transcription.R-HSA-9614085	1
364	FALSE	FALSE	TRUE	FOXO-mediated transcription of oxidative stress, metabolic and neuronal genes.R-HSA-9615017	1
365	FALSE	FALSE	TRUE	FOXO-mediated transcription of cell cycle genes.R-HSA-9617828	1
366	FALSE	FALSE	TRUE	Estrogen-dependent gene expression.R-HSA-9018519	1
367	FALSE	FALSE	TRUE	FLT3 Signaling.R-HSA-9607240	1
368	FALSE	FALSE	TRUE	FCGR activation.R-HSA-2029481	1
369	FALSE	FALSE	TRUE	NOSIP mediated eNOS trafficking.R-HSA-203754	1
370	FALSE	FALSE	TRUE	NOTCH2 intracellular domain regulates transcription.R-HSA-2197563	1
371	FALSE	FALSE	TRUE	NOTCH3 Intracellular Domain Regulates Transcription.R-HSA-9013508	1
372	FALSE	FALSE	TRUE	FCERI mediated MAPK activation.R-HSA-2871796	1
373	FALSE	FALSE	TRUE	FCERI mediated Ca+2 mobilization.R-HSA-2871809	1
374	FALSE	FALSE	TRUE	Estrogen-stimulated signaling through PRKCZ.R-HSA-9634635	1
375	FALSE	FALSE	TRUE	NOTCH4 Intracellular Domain Regulates Transcription.R-HSA-9013695	1
376	FALSE	FALSE	TRUE	Mitochondrial calcium ion transport.R-HSA-8949215	1
377	FALSE	FALSE	TRUE	ISG15 antiviral mechanism.R-HSA-1169408	1
378	FALSE	FALSE	TRUE	MicroRNA (miRNA) biogenesis.R-HSA-203927	1
379	FALSE	FALSE	TRUE	Intracellular signaling by second messengers.R-HSA-9006925	1
380	FALSE	FALSE	TRUE	Interleukin-35 Signalling.R-HSA-8984722	1
381	FALSE	FALSE	TRUE	IKK complex recruitment mediated by RIP1.R-HSA-937041	1
382	FALSE	FALSE	TRUE	Interleukin-38 signaling.R-HSA-9007892	1
383	FALSE	FALSE	TRUE	Hydrolysis of LPC.R-HSA-1483115	1
384	FALSE	FALSE	TRUE	Interleukin-4 and Interleukin-13 signaling.R-HSA-6785807	1
385	FALSE	FALSE	TRUE	Hedgehog 'on' state.R-HSA-5632684	1
386	FALSE	FALSE	TRUE	Interleukin-6 family signaling.R-HSA-6783589	1
387	FALSE	FALSE	TRUE	Interleukin-6 signaling.R-HSA-1059683	1
388	FALSE	FALSE	TRUE	Interleukin-9 signaling.R-HSA-8985947	1
389	FALSE	FALSE	TRUE	Intracellular oxygen transport.R-HSA-8981607	1
390	FALSE	FALSE	TRUE	HIV elongation arrest and recovery.R-HSA-167287	1
391	FALSE	FALSE	TRUE	Interleukin-27 signaling.R-HSA-9020956	1
392	FALSE	FALSE	TRUE	Intrinsic Pathway for Apoptosis.R-HSA-109606	1
393	FALSE	FALSE	TRUE	Intrinsic Pathway of Fibrin Clot Formation.R-HSA-140837	1
394	FALSE	FALSE	TRUE	Killing mechanisms.R-HSA-9664420	1
395	FALSE	FALSE	TRUE	Leading Strand Synthesis.R-HSA-69109	1
396	FALSE	FALSE	TRUE	Leishmania infection.R-HSA-9658195	1
397	FALSE	FALSE	TRUE	Leishmania phagocytosis.R-HSA-9664417	1
398	FALSE	FALSE	TRUE	Localization of the PINCH-ILK-PARVIN complex to focal adhesions.R-HSA-446343	1
399	FALSE	FALSE	TRUE	HIV Transcription Elongation.R-HSA-167169	1
400	FALSE	FALSE	TRUE	HDACs deacetylate histones.R-HSA-3214815	1
401	FALSE	FALSE	TRUE	Long-term potentiation.R-HSA-9620244	1
402	FALSE	FALSE	TRUE	Interleukin-3, Interleukin-5 and GM-CSF signaling.R-HSA-512988	1
403	FALSE	FALSE	TRUE	Interleukin-23 signaling.R-HSA-9020933	1
404	FALSE	FALSE	TRUE	M Phase.R-HSA-68886	1
405	FALSE	FALSE	TRUE	Integration of energy metabolism.R-HSA-163685	1
406	FALSE	FALSE	TRUE	IRAK2 mediated activation of TAK1 complex.R-HSA-937042	1
407	FALSE	FALSE	TRUE	Infection with Mycobacterium tuberculosis.R-HSA-9635486	1
408	FALSE	FALSE	TRUE	IRAK2 mediated activation of TAK1 complex upon TLR7-8 or 9 stimulation.R-HSA-975163	1
409	FALSE	FALSE	TRUE	IRAK1 recruits IKK complex.R-HSA-937039	1
410	FALSE	FALSE	TRUE	Inhibition of Signaling by Overexpressed EGFR.R-HSA-5638303	1
411	FALSE	FALSE	TRUE	InlB-mediated entry of Listeria monocytogenes into host cell.R-HSA-8875360	1
412	FALSE	FALSE	TRUE	IRAK1 recruits IKK complex upon TLR7-8 or 9 stimulation.R-HSA-975144	1
413	FALSE	FALSE	TRUE	Innate Immune System.R-HSA-168249	1
414	FALSE	FALSE	TRUE	Insertion of tail-anchored proteins into the endoplasmic reticulum membrane.R-HSA-9609523	1
415	FALSE	FALSE	TRUE	Insulin receptor recycling.R-HSA-77387	1
416	FALSE	FALSE	TRUE	Integrin signaling.R-HSA-354192	1
417	FALSE	FALSE	TRUE	Interleukin-21 signaling.R-HSA-9020958	1
418	FALSE	FALSE	TRUE	Interactions of Tat with host cellular proteins.R-HSA-176034	1
419	FALSE	FALSE	TRUE	Interconversion of nucleotide di- and triphosphates.R-HSA-499943	1
420	FALSE	FALSE	TRUE	Interleukin-1 family signaling.R-HSA-446652	1
421	FALSE	FALSE	TRUE	IL-6-type cytokine receptor ligand interactions.R-HSA-6788467	1
422	FALSE	FALSE	TRUE	Interleukin-1 signaling.R-HSA-9020702	1
423	FALSE	FALSE	TRUE	Interleukin-12 family signaling.R-HSA-447115	1
424	FALSE	FALSE	TRUE	Interleukin-15 signaling.R-HSA-8983432	1
425	FALSE	FALSE	TRUE	Interleukin-17 signaling.R-HSA-448424	1
426	FALSE	FALSE	TRUE	Interleukin-2 family signaling.R-HSA-451927	1
427	FALSE	FALSE	TRUE	Interleukin-20 family signaling.R-HSA-8854691	1
428	FALSE	FALSE	TRUE	Lysosome Vesicle Biogenesis.R-HSA-432720	1
429	FALSE	FALSE	TRUE	HATs acetylate histones.R-HSA-3214847	1
430	FALSE	FALSE	TRUE	Formation of Senescence-Associated Heterochromatin Foci (SAHF).R-HSA-2559584	1
431	FALSE	FALSE	TRUE	G alpha (z) signalling events.R-HSA-418597	1
432	FALSE	FALSE	TRUE	GABA synthesis, release, reuptake and degradation.R-HSA-888590	1
433	FALSE	FALSE	TRUE	MHC class II antigen presentation.R-HSA-2132295	1
434	FALSE	FALSE	TRUE	MTF1 activates gene expression.R-HSA-5660489	1
435	FALSE	FALSE	TRUE	G2-M DNA damage checkpoint.R-HSA-69473	1
436	FALSE	FALSE	TRUE	G2-M Checkpoints.R-HSA-69481	1
437	FALSE	FALSE	TRUE	MTOR signalling.R-HSA-165159	1
438	FALSE	FALSE	TRUE	G1-S Transition.R-HSA-69206	1
439	FALSE	FALSE	TRUE	G-protein activation.R-HSA-202040	1
440	FALSE	FALSE	TRUE	Immune System.R-HSA-168256	1
441	FALSE	FALSE	TRUE	G beta:gamma signalling through PI3Kgamma.R-HSA-392451	1
442	FALSE	FALSE	TRUE	Formyl peptide receptors bind formyl peptides and many other ligands.R-HSA-444473	1
443	FALSE	FALSE	TRUE	GPVI-mediated activation cascade.R-HSA-114604	1
444	FALSE	FALSE	TRUE	Formation of tubulin folding intermediates by CCT-TriC.R-HSA-389960	1
445	FALSE	FALSE	TRUE	Macroautophagy.R-HSA-1632852	1
446	FALSE	FALSE	TRUE	Formation of the HIV-1 Early Elongation Complex.R-HSA-167158	1
447	FALSE	FALSE	TRUE	Formation of the Editosome.R-HSA-75094	1
448	FALSE	FALSE	TRUE	Meiosis.R-HSA-1500620	1
449	FALSE	FALSE	TRUE	Formation of the Early Elongation Complex.R-HSA-113418	1
450	FALSE	FALSE	TRUE	Meiotic synapsis.R-HSA-1221632	1
451	FALSE	FALSE	TRUE	Metabolism of lipids.R-HSA-556833	1
452	FALSE	FALSE	TRUE	Metabolism of water-soluble vitamins and cofactors.R-HSA-196849	1
453	FALSE	FALSE	TRUE	Metalloprotease DUBs.R-HSA-5689901	1
454	FALSE	FALSE	TRUE	MECP2 regulates transcription of neuronal ligands.R-HSA-9022702	1
455	FALSE	FALSE	TRUE	GRB2 events in EGFR signaling.R-HSA-179812	1
456	FALSE	FALSE	TRUE	Golgi-to-ER retrograde transport.R-HSA-8856688	1
457	FALSE	FALSE	TRUE	Glucagon signaling in metabolic regulation.R-HSA-163359	1
458	FALSE	FALSE	TRUE	Glyoxylate metabolism and glycine degradation.R-HSA-389661	1
459	FALSE	FALSE	TRUE	Glycoprotein hormones.R-HSA-209822	1
460	FALSE	FALSE	TRUE	MAP kinase activation.R-HSA-450294	1
461	FALSE	FALSE	TRUE	Glycerophospholipid catabolism.R-HSA-6814848	1
462	FALSE	FALSE	TRUE	Glutamate binding, activation of AMPA receptors and synaptic plasticity.R-HSA-399721	1
463	FALSE	FALSE	TRUE	MAP2K and MAPK activation.R-HSA-5674135	1
464	FALSE	FALSE	TRUE	MAP3K8 (TPL2)-dependent MAPK1-3 activation.R-HSA-5684264	1
465	FALSE	FALSE	TRUE	Glutamate Neurotransmitter Release Cycle.R-HSA-210500	1
466	FALSE	FALSE	TRUE	Gluconeogenesis.R-HSA-70263	1
467	FALSE	FALSE	TRUE	Glucagon-type ligand receptors.R-HSA-420092	1
468	FALSE	FALSE	TRUE	Global Genome Nucleotide Excision Repair (GG-NER).R-HSA-5696399	1
469	FALSE	FALSE	TRUE	MECP2 regulates neuronal receptors and channels.R-HSA-9022699	1
470	FALSE	FALSE	TRUE	MAPK family signaling cascades.R-HSA-5683057	1
471	FALSE	FALSE	TRUE	Generic Transcription Pathway.R-HSA-212436	1
472	FALSE	FALSE	TRUE	MAPK targets- Nuclear events mediated by MAP kinases.R-HSA-450282	1
473	FALSE	FALSE	TRUE	Gene expression (Transcription).R-HSA-74160	1
474	FALSE	FALSE	TRUE	Gene and protein expression by JAK-STAT signaling after Interleukin-12 stimulation.R-HSA-8950505	1
475	FALSE	FALSE	TRUE	MAPK1-MAPK3 signaling.R-HSA-5684996	1
476	FALSE	FALSE	TRUE	Gap junction trafficking.R-HSA-190828	1
477	FALSE	FALSE	TRUE	Gap junction assembly.R-HSA-190861	1
478	FALSE	FALSE	TRUE	MAPK3 (ERK1) activation.R-HSA-110056	1
479	FALSE	FALSE	TRUE	GRB2:SOS provides linkage to MAPK signaling for Integrins .R-HSA-354194	1
480	FALSE	FALSE	TRUE	Interleukin-12 signaling.R-HSA-9020591	1
481	TRUE	FALSE	FALSE	2-LTR circle formation.R-HSA-164843	1
482	FALSE	FALSE	TRUE	Neurotransmitter receptors and postsynaptic signal transmission.R-HSA-112314	1
483	FALSE	FALSE	TRUE	Signaling by Retinoic Acid.R-HSA-5362517	1
484	FALSE	FALSE	TRUE	Signaling by moderate kinase activity BRAF mutants.R-HSA-6802946	1
485	FALSE	FALSE	TRUE	Signaling by the B Cell Receptor (BCR).R-HSA-983705	1
486	FALSE	FALSE	TRUE	Signaling downstream of RAS mutants.R-HSA-9649948	1
487	FALSE	FALSE	TRUE	Signalling to ERKs.R-HSA-187687	1
488	FALSE	FALSE	TRUE	Signalling to STAT3.R-HSA-198745	1
489	FALSE	FALSE	TRUE	Smooth Muscle Contraction.R-HSA-445355	1
490	FALSE	FALSE	TRUE	Switching of origins to a post-replicative state.R-HSA-69052	1
491	FALSE	FALSE	TRUE	Synthesis of PG.R-HSA-1483148	1
492	FALSE	FALSE	TRUE	Synthesis of PIPs at the ER membrane.R-HSA-1483248	1
493	FALSE	FALSE	TRUE	Synthesis of PS.R-HSA-1483101	1
494	FALSE	FALSE	TRUE	TAK1 activates NFkB by phosphorylation and activation of IKKs complex.R-HSA-445989	1
495	FALSE	FALSE	TRUE	TBC-RABGAPs.R-HSA-8854214	1
496	FALSE	FALSE	TRUE	TICAM1-dependent activation of IRF3-IRF7.R-HSA-9013973	1
497	FALSE	FALSE	TRUE	TLR3-mediated TICAM1-dependent programmed cell death.R-HSA-9013957	1
498	FALSE	FALSE	TRUE	TNFR1-induced proapoptotic signaling.R-HSA-5357786	1
499	FALSE	FALSE	TRUE	TRAF3-dependent IRF activation pathway.R-HSA-918233	1
500	FALSE	FALSE	TRUE	TRAF6 mediated IRF7 activation in TLR7-8 or 9 signaling.R-HSA-975110	1
501	FALSE	FALSE	TRUE	TRAF6 mediated IRF7 activation.R-HSA-933541	1
502	FALSE	FALSE	TRUE	TRAF6 mediated NF-kB activation.R-HSA-933542	1
503	FALSE	FALSE	TRUE	TRAF6 mediated induction of NFkB and MAP kinases upon TLR7-8 or 9 activation.R-HSA-975138	1
504	FALSE	FALSE	TRUE	TRAF6-mediated induction of TAK1 complex within TLR4 complex.R-HSA-937072	1
505	FALSE	FALSE	TRUE	TRIF(TICAM1)-mediated TLR4 signaling .R-HSA-937061	1
506	FALSE	FALSE	TRUE	TRIF-mediated programmed cell death.R-HSA-2562578	1
507	FALSE	FALSE	TRUE	Signaling by Rho GTPases.R-HSA-194315	1
508	FALSE	FALSE	TRUE	Signaling by RAS mutants.R-HSA-6802949	1
509	FALSE	FALSE	TRUE	Neurotransmitter release cycle.R-HSA-112310	1
510	FALSE	FALSE	TRUE	Signaling by PDGFRA transmembrane, juxtamembrane and kinase domain mutants.R-HSA-9673767	1
511	FALSE	FALSE	TRUE	SIRT1 negatively regulates rRNA expression.R-HSA-427359	1
512	FALSE	FALSE	TRUE	SMAC (DIABLO) binds to IAPs .R-HSA-111463	1
513	FALSE	FALSE	TRUE	SMAC(DIABLO)-mediated dissociation of IAP:caspase complexes .R-HSA-111464	1
514	FALSE	FALSE	TRUE	SMAC, XIAP-regulated apoptotic response.R-HSA-111469	1
515	FALSE	FALSE	TRUE	SUMO is conjugated to E1 (UBA2:SAE1).R-HSA-3065676	1
516	FALSE	FALSE	TRUE	Sema4D induced cell migration and growth-cone collapse.R-HSA-416572	1
517	FALSE	FALSE	TRUE	Senescence-Associated Secretory Phenotype (SASP).R-HSA-2559582	1
518	FALSE	FALSE	TRUE	Serotonin Neurotransmitter Release Cycle.R-HSA-181429	1
519	FALSE	FALSE	TRUE	Signal Transduction.R-HSA-162582	1
520	FALSE	FALSE	TRUE	Signal amplification.R-HSA-392518	1
521	FALSE	FALSE	TRUE	Signaling by BRAF and RAF fusions.R-HSA-6802952	1
522	FALSE	FALSE	TRUE	Signaling by EGFR.R-HSA-177929	1
523	FALSE	FALSE	TRUE	Signaling by Interleukins.R-HSA-449147	1
524	FALSE	FALSE	TRUE	Signaling by NOTCH.R-HSA-157118	1
525	FALSE	FALSE	TRUE	Signaling by NOTCH1 in Cancer.R-HSA-2644603	1
526	FALSE	FALSE	TRUE	Signaling by NOTCH2.R-HSA-1980145	1
527	FALSE	FALSE	TRUE	Signaling by NOTCH4.R-HSA-9013694	1
528	FALSE	FALSE	TRUE	Signaling by NTRK2 (TRKB).R-HSA-9006115	1
529	FALSE	FALSE	TRUE	Signaling by NTRKs.R-HSA-166520	1
530	FALSE	FALSE	TRUE	Signaling by Nuclear Receptors.R-HSA-9006931	1
531	FALSE	FALSE	TRUE	Signaling by Overexpressed Wild-Type EGFR in Cancer.R-HSA-5638302	1
532	FALSE	FALSE	TRUE	Signaling by PDGFR in disease.R-HSA-9671555	1
533	FALSE	FALSE	TRUE	Signaling by PDGFRA extracellular domain mutants.R-HSA-9673770	1
534	FALSE	FALSE	TRUE	Tat-mediated HIV elongation arrest and recovery.R-HSA-167243	1
535	FALSE	FALSE	TRUE	Tat-mediated elongation of the HIV-1 transcript.R-HSA-167246	1
536	FALSE	FALSE	TRUE	Telomere C-strand synthesis initiation.R-HSA-174430	1
537	FALSE	FALSE	TRUE	Telomere Maintenance.R-HSA-157579	1
538	FALSE	FALSE	TRUE	Transfer of LPS from LBP carrier to CD14.R-HSA-166020	1
539	FALSE	FALSE	TRUE	Transferrin endocytosis and recycling.R-HSA-917977	1
540	FALSE	FALSE	TRUE	Translesion synthesis by POLI.R-HSA-5656121	1
541	FALSE	FALSE	TRUE	Translesion synthesis by POLK.R-HSA-5655862	1
542	FALSE	FALSE	TRUE	Translesion synthesis by REV1.R-HSA-110312	1
543	FALSE	FALSE	TRUE	Translesion synthesis by Y family DNA polymerases bypasses lesions on DNA template.R-HSA-110313	1
544	FALSE	FALSE	TRUE	Transmission across Chemical Synapses.R-HSA-112315	1
545	FALSE	FALSE	TRUE	Transport to the Golgi and subsequent modification.R-HSA-948021	1
546	FALSE	FALSE	TRUE	Triglyceride catabolism.R-HSA-163560	1
547	FALSE	FALSE	TRUE	Tyrosine catabolism.R-HSA-8963684	1
548	FALSE	FALSE	TRUE	UCH proteinases.R-HSA-5689603	1
549	FALSE	FALSE	TRUE	Ub-specific processing proteases.R-HSA-5689880	1
550	FALSE	FALSE	TRUE	VLDLR internalisation and degradation.R-HSA-8866427	1
551	FALSE	FALSE	TRUE	Viral Messenger RNA Synthesis.R-HSA-168325	1
552	FALSE	FALSE	TRUE	Vitamin B5 (pantothenate) metabolism.R-HSA-199220	1
553	FALSE	FALSE	TRUE	WNT5:FZD7-mediated leishmania damping.R-HSA-9673324	1
554	FALSE	FALSE	TRUE	WNT5A-dependent internalization of FZD2, FZD5 and ROR2.R-HSA-5140745	1
555	FALSE	FALSE	TRUE	mRNA Editing.R-HSA-75072	1
556	FALSE	FALSE	TRUE	mRNA Editing: C to U Conversion.R-HSA-72200	1
557	FALSE	FALSE	TRUE	mTORC1-mediated signalling.R-HSA-166208	1
558	FALSE	FALSE	TRUE	p130Cas linkage to MAPK signaling for integrins.R-HSA-372708	1
559	FALSE	FALSE	TRUE	p75NTR negatively regulates cell cycle via SC1.R-HSA-193670	1
560	FALSE	FALSE	TRUE	phospho-PLA2 pathway.R-HSA-111995	1
561	FALSE	FALSE	TRUE	Transcriptional regulation of granulopoiesis.R-HSA-9616222	1
562	FALSE	FALSE	TRUE	Transcriptional regulation by small RNAs.R-HSA-5578749	1
563	FALSE	FALSE	TRUE	Transcriptional regulation by RUNX1.R-HSA-8878171	1
564	FALSE	FALSE	TRUE	Toll Like Receptor 4 (TLR4) Cascade.R-HSA-166016	1
565	FALSE	FALSE	TRUE	The AIM2 inflammasome.R-HSA-844615	1
566	FALSE	FALSE	TRUE	The citric acid (TCA) cycle and respiratory electron transport.R-HSA-1428517	1
567	FALSE	FALSE	TRUE	The role of GTSE1 in G2-M progression after G2 checkpoint.R-HSA-8852276	1
568	FALSE	FALSE	TRUE	The role of Nef in HIV-1 replication and disease pathogenesis.R-HSA-164952	1
569	FALSE	FALSE	TRUE	Thrombin signalling through proteinase activated receptors (PARs).R-HSA-456926	1
570	FALSE	FALSE	TRUE	Thromboxane signalling through TP receptor.R-HSA-428930	1
571	FALSE	FALSE	TRUE	Tie2 Signaling.R-HSA-210993	1
572	FALSE	FALSE	TRUE	Toll Like Receptor 10 (TLR10) Cascade.R-HSA-168142	1
573	FALSE	FALSE	TRUE	Toll Like Receptor 2 (TLR2) Cascade.R-HSA-181438	1
574	FALSE	FALSE	TRUE	Toll Like Receptor 3 (TLR3) Cascade.R-HSA-168164	1
575	FALSE	FALSE	TRUE	Toll Like Receptor 5 (TLR5) Cascade.R-HSA-168176	1
576	FALSE	FALSE	TRUE	Transcriptional Regulation by MECP2.R-HSA-8986944	1
577	FALSE	FALSE	TRUE	Toll Like Receptor 7-8 (TLR7-8) Cascade.R-HSA-168181	1
578	FALSE	FALSE	TRUE	Toll Like Receptor 9 (TLR9) Cascade.R-HSA-168138	1
579	FALSE	FALSE	TRUE	Toll Like Receptor TLR1:TLR2 Cascade.R-HSA-168179	1
580	FALSE	FALSE	TRUE	Toll Like Receptor TLR6:TLR2 Cascade.R-HSA-168188	1
581	FALSE	FALSE	TRUE	Toll-like Receptor Cascades.R-HSA-168898	1
582	FALSE	FALSE	TRUE	Toxicity of botulinum toxin type C (BoNT-C).R-HSA-5250971	1
583	FALSE	FALSE	TRUE	Toxicity of tetanus toxin (TeNT).R-HSA-5250982	1
584	FALSE	FALSE	TRUE	Trafficking of AMPA receptors.R-HSA-399719	1
585	FALSE	FALSE	TRUE	Trafficking of GluR2-containing AMPA receptors.R-HSA-416993	1
586	FALSE	FALSE	TRUE	Trafficking of myristoylated proteins to the cilium.R-HSA-5624138	1
587	FALSE	FALSE	TRUE	SHC1 events in EGFR signaling.R-HSA-180336	1
588	FALSE	FALSE	TRUE	S Phase.R-HSA-69242	1
589	FALSE	FALSE	TRUE	Role of phospholipids in phagocytosis.R-HSA-2029485	1
590	FALSE	FALSE	TRUE	Pyruvate metabolism and Citric Acid (TCA) cycle.R-HSA-71406	1
591	FALSE	FALSE	TRUE	Phase II - Conjugation of compounds.R-HSA-156580	1
592	FALSE	FALSE	TRUE	Phenylalanine and tyrosine metabolism.R-HSA-8963691	1
593	FALSE	FALSE	TRUE	Phospholipid metabolism.R-HSA-1483257	1
594	FALSE	FALSE	TRUE	Platelet Adhesion to exposed collagen.R-HSA-75892	1
595	FALSE	FALSE	TRUE	Platelet Aggregation (Plug Formation).R-HSA-76009	1
596	FALSE	FALSE	TRUE	Platelet homeostasis.R-HSA-418346	1
597	FALSE	FALSE	TRUE	Polo-like kinase mediated events.R-HSA-156711	1
598	FALSE	FALSE	TRUE	Polymerase switching on the C-strand of the telomere.R-HSA-174411	1
599	FALSE	FALSE	TRUE	Polymerase switching.R-HSA-69091	1
600	FALSE	FALSE	TRUE	Positive epigenetic regulation of rRNA expression.R-HSA-5250913	1
601	FALSE	FALSE	TRUE	Post NMDA receptor activation events.R-HSA-438064	1
602	FALSE	FALSE	TRUE	Post-translational protein modification.R-HSA-597592	1
603	FALSE	FALSE	TRUE	Potassium Channels.R-HSA-1296071	1
604	FALSE	FALSE	TRUE	Pre-NOTCH Expression and Processing.R-HSA-1912422	1
605	FALSE	FALSE	TRUE	Pre-NOTCH Transcription and Translation.R-HSA-1912408	1
606	FALSE	FALSE	TRUE	Prefoldin mediated transfer of substrate to CCT-TriC.R-HSA-389957	1
607	FALSE	FALSE	TRUE	Presynaptic function of Kainate receptors.R-HSA-500657	1
608	FALSE	FALSE	TRUE	Processing of DNA double-strand break ends.R-HSA-5693607	1
609	FALSE	FALSE	TRUE	Processing of SMDT1.R-HSA-8949664	1
610	FALSE	FALSE	TRUE	Programmed Cell Death.R-HSA-5357801	1
611	FALSE	FALSE	TRUE	Prostacyclin signalling through prostacyclin receptor.R-HSA-392851	1
612	FALSE	FALSE	TRUE	Protein folding.R-HSA-391251	1
613	FALSE	FALSE	TRUE	Protein ubiquitination.R-HSA-8852135	1
614	FALSE	FALSE	TRUE	Peptide hormone biosynthesis.R-HSA-209952	1
615	FALSE	FALSE	TRUE	Pausing and recovery of Tat-mediated HIV elongation.R-HSA-167238	1
616	FALSE	FALSE	TRUE	Pausing and recovery of HIV elongation.R-HSA-167290	1
617	FALSE	FALSE	TRUE	Ovarian tumor domain proteases.R-HSA-5689896	1
618	FALSE	FALSE	TRUE	NoRC negatively regulates rRNA expression.R-HSA-427413	1
619	FALSE	FALSE	TRUE	Nonhomologous End-Joining (NHEJ).R-HSA-5693571	1
620	FALSE	FALSE	TRUE	Norepinephrine Neurotransmitter Release Cycle.R-HSA-181430	1
621	FALSE	FALSE	TRUE	Nucleosome assembly.R-HSA-774815	1
622	FALSE	FALSE	TRUE	Nucleotide Excision Repair.R-HSA-5696398	1
623	FALSE	FALSE	TRUE	Oncogene Induced Senescence.R-HSA-2559585	1
624	FALSE	FALSE	TRUE	Oncogenic MAPK signaling.R-HSA-6802957	1
625	FALSE	FALSE	TRUE	Opioid Signalling.R-HSA-111885	1
626	FALSE	FALSE	TRUE	Orc1 removal from chromatin.R-HSA-68949	1
627	FALSE	FALSE	TRUE	Organic anion transporters.R-HSA-428643	1
628	FALSE	FALSE	TRUE	Oxidative Stress Induced Senescence.R-HSA-2559580	1
629	FALSE	FALSE	TRUE	Parasite infection.R-HSA-9664407	1
630	FALSE	FALSE	TRUE	PECAM1 interactions.R-HSA-210990	1
631	FALSE	FALSE	TRUE	PI and PC transport between ER and Golgi membranes.R-HSA-1483196	1
632	FALSE	FALSE	TRUE	PI3K-AKT Signaling in Cancer.R-HSA-2219528	1
633	FALSE	FALSE	TRUE	PI5P Regulates TP53 Acetylation.R-HSA-6811555	1
634	FALSE	FALSE	TRUE	PIP3 activates AKT signaling.R-HSA-1257604	1
635	FALSE	FALSE	TRUE	PLC-gamma1 signalling.R-HSA-167021	1
636	FALSE	FALSE	TRUE	PRC2 methylates histones and DNA.R-HSA-212300	1
637	FALSE	FALSE	TRUE	PTEN Regulation.R-HSA-6807070	1
638	FALSE	FALSE	TRUE	Packaging Of Telomere Ends.R-HSA-171306	1
639	FALSE	FALSE	TRUE	Paradoxical activation of RAF signaling by kinase inactive BRAF.R-HSA-6802955	1
640	FALSE	FALSE	TRUE	Protein-protein interactions at synapses.R-HSA-6794362	1
641	FALSE	FALSE	TRUE	Pyruvate metabolism.R-HSA-70268	1
642	FALSE	FALSE	TRUE	Retrograde neurotrophin signalling.R-HSA-177504	1
643	FALSE	FALSE	TRUE	RAB GEFs exchange GTP for GDP on RABs.R-HSA-8876198	1
644	FALSE	FALSE	TRUE	Recycling of eIF2:GDP.R-HSA-72731	1
645	FALSE	FALSE	TRUE	Reelin signalling pathway.R-HSA-8866376	1
646	FALSE	FALSE	TRUE	Regulated Necrosis.R-HSA-5218859	1
647	FALSE	FALSE	TRUE	Regulation of IFNG signaling.R-HSA-877312	1
648	FALSE	FALSE	TRUE	Regulation of MECP2 expression and activity.R-HSA-9022692	1
649	FALSE	FALSE	TRUE	Regulation of PTEN mRNA translation.R-HSA-8943723	1
650	FALSE	FALSE	TRUE	Regulation of TLR by endogenous ligand.R-HSA-5686938	1
651	FALSE	FALSE	TRUE	Regulation of TP53 Activity through Acetylation.R-HSA-6804758	1
652	FALSE	FALSE	TRUE	Regulation of actin dynamics for phagocytic cup formation.R-HSA-2029482	1
653	FALSE	FALSE	TRUE	Regulation of beta-cell development.R-HSA-186712	1
654	FALSE	FALSE	TRUE	Regulation of cholesterol biosynthesis by SREBP (SREBF).R-HSA-1655829	1
655	FALSE	FALSE	TRUE	Regulation of cortical dendrite branching.R-HSA-8985801	1
656	FALSE	FALSE	TRUE	Regulation of gene expression in endocrine-committed (NEUROG3+) progenitor cells.R-HSA-210746	1
657	FALSE	FALSE	TRUE	Regulation of gene expression in late stage (branching morphogenesis) pancreatic bud precursor cells.R-HSA-210744	1
658	FALSE	FALSE	TRUE	Regulation of insulin secretion.R-HSA-422356	1
659	FALSE	FALSE	TRUE	Regulation of localization of FOXO transcription factors.R-HSA-9614399	1
660	FALSE	FALSE	TRUE	Regulation of pyruvate dehydrogenase (PDH) complex.R-HSA-204174	1
661	FALSE	FALSE	TRUE	Release of apoptotic factors from the mitochondria.R-HSA-111457	1
662	FALSE	FALSE	TRUE	Reproduction.R-HSA-1474165	1
663	FALSE	FALSE	TRUE	Resolution of AP sites via the single-nucleotide replacement pathway.R-HSA-110381	1
664	FALSE	FALSE	TRUE	Resolution of Abasic Sites (AP sites).R-HSA-73933	1
665	FALSE	FALSE	TRUE	Respiratory electron transport, ATP synthesis by chemiosmotic coupling, and heat production by uncoupling proteins.R-HSA-163200	1
666	FALSE	FALSE	TRUE	Respiratory electron transport.R-HSA-611105	1
667	FALSE	FALSE	TRUE	Recruitment and ATM-mediated phosphorylation of repair and signaling proteins at DNA double strand breaks.R-HSA-5693565	1
668	FALSE	FALSE	TRUE	Recognition and association of DNA glycosylase with site containing an affected pyrimidine.R-HSA-110328	1
669	FALSE	FALSE	TRUE	Recognition and association of DNA glycosylase with site containing an affected purine.R-HSA-110330	1
670	FALSE	FALSE	TRUE	RMTs methylate histone arginines.R-HSA-3214858	1
671	FALSE	FALSE	TRUE	RAF-MAP kinase cascade.R-HSA-5673001	1
672	FALSE	FALSE	TRUE	RAF-independent MAPK1-3 activation.R-HSA-112409	1
673	FALSE	FALSE	TRUE	RHO GTPase Effectors.R-HSA-195258	1
674	FALSE	FALSE	TRUE	RHO GTPases Activate ROCKs.R-HSA-5627117	1
675	FALSE	FALSE	TRUE	RHO GTPases Activate WASPs and WAVEs.R-HSA-5663213	1
676	FALSE	FALSE	TRUE	RHO GTPases activate IQGAPs.R-HSA-5626467	1
677	FALSE	FALSE	TRUE	RHO GTPases activate PAKs.R-HSA-5627123	1
678	FALSE	FALSE	TRUE	RHO GTPases activate PKNs.R-HSA-5625740	1
679	FALSE	FALSE	TRUE	RIP-mediated NFkB activation via ZBP1.R-HSA-1810476	1
680	FALSE	FALSE	TRUE	RIPK1-mediated regulated necrosis.R-HSA-5213460	1
681	FALSE	FALSE	TRUE	RNA Polymerase I Promoter Clearance.R-HSA-73854	1
682	FALSE	FALSE	TRUE	Receptor Mediated Mitophagy.R-HSA-8934903	1
683	FALSE	FALSE	TRUE	RNA Polymerase I Promoter Escape.R-HSA-73772	1
684	FALSE	FALSE	TRUE	RNA Polymerase I Promoter Opening.R-HSA-73728	1
685	FALSE	FALSE	TRUE	RNA Polymerase I Transcription Termination.R-HSA-73863	1
686	FALSE	FALSE	TRUE	Displacement of DNA glycosylase by APEX1.R-HSA-110357	1
687	FALSE	FALSE	TRUE	RNA Polymerase I Transcription.R-HSA-73864	1
688	FALSE	FALSE	TRUE	RUNX1 regulates genes involved in megakaryocyte differentiation and platelet function.R-HSA-8936459	1
689	FALSE	FALSE	TRUE	RUNX1 regulates transcription of genes involved in differentiation of HSCs.R-HSA-8939236	1
690	FALSE	FALSE	TRUE	RUNX3 Regulates Immune Response and Cell Migration.R-HSA-8949275	1
691	FALSE	FALSE	TRUE	RUNX3 regulates NOTCH signaling.R-HSA-8941856	1
692	FALSE	FALSE	TRUE	Rab regulation of trafficking.R-HSA-9007101	1
693	FALSE	FALSE	TRUE	Dopamine Neurotransmitter Release Cycle.R-HSA-212676	1
694	FALSE	TRUE	FALSE	TCF dependent signaling in response to WNT.R-HSA-201681	1
695	FALSE	FALSE	TRUE	Disinhibition of SNARE formation.R-HSA-114516	1
696	FALSE	TRUE	FALSE	Disorders of transmembrane transporters.R-HSA-5619115	1
697	FALSE	TRUE	FALSE	Creatine metabolism.R-HSA-71288	1
698	FALSE	TRUE	FALSE	DNA Damage Reversal.R-HSA-73942	1
699	FALSE	TRUE	FALSE	Deactivation of the beta-catenin transactivating complex.R-HSA-3769402	1
700	FALSE	TRUE	FALSE	Dectin-2 family.R-HSA-5621480	1
701	FALSE	TRUE	FALSE	Defective CFTR causes cystic fibrosis.R-HSA-5678895	1
702	FALSE	TRUE	FALSE	Degradation of GLI1 by the proteasome.R-HSA-5610780	1
703	FALSE	TRUE	FALSE	Degradation of GLI2 by the proteasome.R-HSA-5610783	1
704	FALSE	TRUE	FALSE	Depolymerisation of the Nuclear Lamina.R-HSA-4419969	1
705	FALSE	TRUE	FALSE	Digestion.R-HSA-8935690	1
706	FALSE	TRUE	FALSE	Dissolution of Fibrin Clot.R-HSA-75205	1
707	FALSE	TRUE	FALSE	Common Pathway of Fibrin Clot Formation.R-HSA-140875	1
708	FALSE	TRUE	FALSE	Drug-mediated inhibition of ERBB2 signaling.R-HSA-9652282	1
709	FALSE	TRUE	FALSE	ECM proteoglycans.R-HSA-3000178	1
710	FALSE	TRUE	FALSE	ERBB2 Activates PTK6 Signaling.R-HSA-8847993	1
711	FALSE	TRUE	FALSE	Elastic fibre formation.R-HSA-1566948	1
712	FALSE	TRUE	FALSE	Estrogen-dependent nuclear events downstream of ESR-membrane signaling.R-HSA-9634638	1
713	FALSE	TRUE	FALSE	FGFR3 mutant receptor activation.R-HSA-2033514	1
714	FALSE	TRUE	FALSE	FGFR4 mutant receptor activation.R-HSA-1839128	1
715	FALSE	TRUE	FALSE	Fatty acyl-CoA biosynthesis.R-HSA-75105	1
716	FALSE	TRUE	FALSE	Fibronectin matrix formation.R-HSA-1566977	1
717	FALSE	TRUE	FALSE	Constitutive Signaling by NOTCH1 t(7
718	FALSE	TRUE	FALSE	Chylomicron remodeling.R-HSA-8963901	1
719	FALSE	TRUE	FALSE	Netrin mediated repulsion signals.R-HSA-418886	1
720	FALSE	TRUE	FALSE	Autodegradation of the E3 ubiquitin ligase COP1.R-HSA-349425	1
721	FALSE	TRUE	FALSE	Activated NTRK3 signals through PI3K.R-HSA-9603381	1
722	FALSE	TRUE	FALSE	Activation of BIM and translocation to mitochondria .R-HSA-111446	1
723	FALSE	TRUE	FALSE	Activation of NIMA Kinases NEK9, NEK6, NEK7.R-HSA-2980767	1
724	FALSE	TRUE	FALSE	Adrenoceptors.R-HSA-390696	1
725	FALSE	TRUE	FALSE	Antagonism of Activin by Follistatin.R-HSA-2473224	1
726	FALSE	TRUE	FALSE	Antimicrobial peptides.R-HSA-6803157	1
727	FALSE	TRUE	FALSE	Apoptotic cleavage of cellular proteins.R-HSA-111465	1
728	FALSE	TRUE	FALSE	Attachment of GPI anchor to uPAR.R-HSA-162791	1
729	FALSE	TRUE	FALSE	Attenuation phase.R-HSA-3371568	1
730	FALSE	TRUE	FALSE	Axon guidance.R-HSA-422475	1
731	FALSE	TRUE	FALSE	Chylomicron assembly.R-HSA-8963888	1
732	FALSE	TRUE	FALSE	Basigin interactions.R-HSA-210991	1
733	FALSE	TRUE	FALSE	Beta-oxidation of very long chain fatty acids.R-HSA-390247	1
734	FALSE	TRUE	FALSE	Binding and Uptake of Ligands by Scavenger Receptors.R-HSA-2173782	1
735	FALSE	TRUE	FALSE	CD163 mediating an anti-inflammatory response.R-HSA-9662834	1
736	FALSE	TRUE	FALSE	CDT1 association with the CDC6:ORC:origin complex.R-HSA-68827	1
737	FALSE	TRUE	FALSE	CREB phosphorylation.R-HSA-199920	1
738	FALSE	TRUE	FALSE	Cellular response to heat stress.R-HSA-3371556	1
739	FALSE	TRUE	FALSE	Chaperone Mediated Autophagy.R-HSA-9613829	1
740	FALSE	TRUE	FALSE	Chemokine receptors bind chemokines.R-HSA-380108	1
741	FALSE	TRUE	FALSE	G alpha (i) signalling events.R-HSA-418594	1
742	FALSE	TRUE	FALSE	GLI3 is processed to GLI3R by the proteasome.R-HSA-5610785	1
743	FALSE	TRUE	FALSE	Glycosaminoglycan metabolism.R-HSA-1630316	1
744	FALSE	TRUE	FALSE	Metabolism of fat-soluble vitamins.R-HSA-6806667	1
745	FALSE	TRUE	FALSE	Leukotriene receptors.R-HSA-391906	1
746	FALSE	TRUE	FALSE	Ligand-receptor interactions.R-HSA-5632681	1
747	FALSE	TRUE	FALSE	Lipid particle organization.R-HSA-8964572	1
748	FALSE	TRUE	FALSE	Lysosphingolipid and LPA receptors.R-HSA-419408	1
749	FALSE	TRUE	FALSE	MECP2 regulates transcription factors.R-HSA-9022707	1
750	FALSE	TRUE	FALSE	MECP2 regulates transcription of genes involved in GABA signaling.R-HSA-9022927	1
751	FALSE	TRUE	FALSE	Metabolism of Angiotensinogen to Angiotensins.R-HSA-2022377	1
752	FALSE	TRUE	FALSE	Metabolism of carbohydrates.R-HSA-71387	1
753	FALSE	TRUE	FALSE	Metabolism of cofactors.R-HSA-8978934	1
754	FALSE	TRUE	FALSE	Metabolism of vitamins and cofactors.R-HSA-196854	1
755	FALSE	TRUE	FALSE	HDL assembly.R-HSA-8963896	1
756	FALSE	TRUE	FALSE	Metal sequestration by antimicrobial proteins.R-HSA-6799990	1
757	FALSE	TRUE	FALSE	Microtubule-dependent trafficking of connexons from Golgi to the plasma membrane.R-HSA-190840	1
758	FALSE	TRUE	FALSE	Molecules associated with elastic fibres.R-HSA-2129379	1
759	FALSE	TRUE	FALSE	Myogenesis.R-HSA-525793	1
760	FALSE	TRUE	FALSE	N-glycan trimming in the ER and Calnexin-Calreticulin cycle.R-HSA-532668	1
761	FALSE	TRUE	FALSE	NGF-independant TRKA activation.R-HSA-187024	1
762	FALSE	TRUE	FALSE	NRIF signals cell death from the nucleus.R-HSA-205043	1
763	FALSE	TRUE	FALSE	NTF3 activates NTRK2 (TRKB) signaling.R-HSA-9025046	1
764	FALSE	TRUE	FALSE	NTF4 activates NTRK2 (TRKB) signaling.R-HSA-9026357	1
765	FALSE	TRUE	FALSE	Late endosomal microautophagy.R-HSA-9615710	1
766	FALSE	TRUE	FALSE	Laminin interactions.R-HSA-3000157	1
767	FALSE	TRUE	FALSE	Keratan sulfate-keratin metabolism.R-HSA-1638074	1
768	FALSE	TRUE	FALSE	Keratan sulfate degradation.R-HSA-2022857	1
769	FALSE	TRUE	FALSE	HDL clearance.R-HSA-8964011	1
770	FALSE	TRUE	FALSE	HDL remodeling.R-HSA-8964058	1
771	FALSE	TRUE	FALSE	HS-GAG biosynthesis.R-HSA-2022928	1
772	FALSE	TRUE	FALSE	HSF1 activation.R-HSA-3371511	1
773	FALSE	TRUE	FALSE	HSF1-dependent transactivation.R-HSA-3371571	1
774	FALSE	TRUE	FALSE	Hedgehog ligand biogenesis.R-HSA-5358346	1
775	FALSE	TRUE	FALSE	Heparan sulfate-heparin (HS-GAG) metabolism.R-HSA-1638091	1
776	FALSE	TRUE	FALSE	Hh mutants abrogate ligand secretion.R-HSA-5387390	1
777	FALSE	TRUE	FALSE	Hh mutants that don't undergo autocatalytic processing are degraded by ERAD.R-HSA-5362768	1
778	FALSE	TRUE	FALSE	Hyaluronan metabolism.R-HSA-2142845	1
779	FALSE	TRUE	FALSE	Hyaluronan uptake and degradation.R-HSA-2160916	1
780	FALSE	TRUE	FALSE	IRF3-mediated induction of type I IFN.R-HSA-3270619	1
781	FALSE	TRUE	FALSE	Inhibition of Host mRNA Processing and RNA Silencing.R-HSA-168315	1
782	FALSE	TRUE	FALSE	Inhibition of TSC complex formation by PKB.R-HSA-165181	1
783	FALSE	TRUE	FALSE	Integrin cell surface interactions.R-HSA-216083	1
784	FALSE	TRUE	FALSE	Interleukin-18 signaling.R-HSA-9012546	1
785	FALSE	TRUE	FALSE	Interleukin-36 pathway.R-HSA-9014826	1
786	FALSE	TRUE	FALSE	Iron uptake and transport.R-HSA-917937	1
787	FALSE	TRUE	FALSE	Keratan sulfate biosynthesis.R-HSA-2022854	1
788	FALSE	TRUE	FALSE	Acrosome Reaction and Sperm:Oocyte Membrane Binding.R-HSA-1300645	1
789	FALSE	TRUE	FALSE	AUF1 (hnRNP D0) binds and destabilizes mRNA.R-HSA-450408	1
790	FALSE	TRUE	FALSE	ATF6 (ATF6-alpha) activates chaperones.R-HSA-381033	1
791	TRUE	FALSE	FALSE	Integration of viral DNA into host genomic DNA.R-HSA-175567	1
792	TRUE	FALSE	FALSE	FBXL7 down-regulates AURKA during mitotic entry and in early mitosis.R-HSA-8854050	1
793	TRUE	FALSE	FALSE	Formation of ATP by chemiosmotic coupling.R-HSA-163210	1
794	TRUE	FALSE	FALSE	G alpha (q) signalling events.R-HSA-416476	1
795	TRUE	FALSE	FALSE	G1-S-Specific Transcription.R-HSA-69205	1
796	TRUE	FALSE	FALSE	Highly calcium permeable nicotinic acetylcholine receptors.R-HSA-629597	1
797	TRUE	FALSE	FALSE	Highly calcium permeable postsynaptic nicotinic acetylcholine receptors.R-HSA-629594	1
798	TRUE	FALSE	FALSE	Highly sodium permeable postsynaptic acetylcholine nicotinic receptors.R-HSA-629587	1
799	TRUE	FALSE	FALSE	InlA-mediated entry of Listeria monocytogenes into host cells.R-HSA-8876493	1
800	TRUE	FALSE	FALSE	Integration of provirus.R-HSA-162592	1
801	TRUE	FALSE	FALSE	Interleukin receptor SHC signaling.R-HSA-912526	1
802	TRUE	FALSE	FALSE	Na+-Cl- dependent neurotransmitter transporters.R-HSA-442660	1
803	TRUE	FALSE	FALSE	MASTL Facilitates Mitotic Progression.R-HSA-2465910	1
804	TRUE	FALSE	FALSE	MET activates STAT3.R-HSA-8875791	1
805	TRUE	FALSE	FALSE	MET receptor recycling.R-HSA-8875656	1
806	TRUE	FALSE	FALSE	Metabolism of folate and pterines.R-HSA-196757	1
807	TRUE	FALSE	FALSE	Miscellaneous substrates.R-HSA-211958	1
808	TRUE	FALSE	FALSE	Mitotic G1 phase and G1-S transition.R-HSA-453279	1
809	TRUE	FALSE	FALSE	Mitotic Metaphase-Anaphase Transition.R-HSA-68881	1
810	TRUE	FALSE	FALSE	Modulation by Mtb of host immune system.R-HSA-9637628	1
811	TRUE	FALSE	FALSE	Molybdenum cofactor biosynthesis.R-HSA-947581	1
812	TRUE	FALSE	FALSE	Ephrin signaling.R-HSA-3928664	1
813	TRUE	FALSE	FALSE	ERBB2 Regulates Cell Motility.R-HSA-6785631	1
814	TRUE	FALSE	FALSE	Downregulation of ERBB2:ERBB3 signaling.R-HSA-1358803	1
815	TRUE	FALSE	FALSE	Downregulation of ERBB2 signaling.R-HSA-8863795	1
816	TRUE	FALSE	FALSE	Acetylcholine binding and downstream events.R-HSA-181431	1
817	TRUE	FALSE	FALSE	Autointegration results in viral DNA circles.R-HSA-177539	1
818	TRUE	FALSE	FALSE	Beta-catenin phosphorylation cascade.R-HSA-196299	1
819	TRUE	FALSE	FALSE	Biosynthesis of A2E, implicated in retinal degradation.R-HSA-2466712	1
820	TRUE	FALSE	FALSE	Biosynthesis of the N-glycan precursor (dolichol lipid-linked oligosaccharide, LLO) and transfer to a nascent protein.R-HSA-446193	1
821	TRUE	FALSE	FALSE	Biotin transport and metabolism.R-HSA-196780	1
822	TRUE	FALSE	FALSE	CDK-mediated phosphorylation and removal of Cdc6.R-HSA-69017	1
823	TRUE	FALSE	FALSE	CTLA4 inhibitory signaling.R-HSA-389513	1
824	TRUE	FALSE	FALSE	Chk1-Chk2(Cds1) mediated inactivation of Cyclin B:Cdk1 complex.R-HSA-75035	1
825	TRUE	FALSE	FALSE	Class A-1 (Rhodopsin-like receptors).R-HSA-373076	1
826	TRUE	FALSE	FALSE	Class B-2 (Secretin family receptors).R-HSA-373080	1
827	TRUE	FALSE	FALSE	Costimulation by the CD28 family.R-HSA-388841	1
828	TRUE	FALSE	FALSE	Cyclin A-B1-B2 associated events during G2-M transition.R-HSA-69273	1
829	TRUE	FALSE	FALSE	DEx-H-box helicases activate type I IFN and inflammatory cytokines production .R-HSA-3134963	1
830	TRUE	FALSE	FALSE	Degradation of AXIN.R-HSA-4641257	1
831	TRUE	FALSE	FALSE	Degradation of beta-catenin by the destruction complex.R-HSA-195253	1
832	TRUE	FALSE	FALSE	Disassembly of the destruction complex and recruitment of AXIN to the membrane.R-HSA-4641262	1
833	TRUE	FALSE	FALSE	Diseases associated with visual transduction.R-HSA-2474795	1
834	TRUE	FALSE	FALSE	Diseases of the neuronal system.R-HSA-9675143	1
835	TRUE	FALSE	FALSE	NADE modulates death signalling.R-HSA-205025	1
836	TRUE	FALSE	FALSE	Negative regulation of TCF-dependent signaling by WNT ligand antagonists.R-HSA-3772470	1
837	FALSE	TRUE	FALSE	ATF6 (ATF6-alpha) activates chaperone genes.R-HSA-381183	1
838	TRUE	FALSE	FALSE	alpha-linolenic acid (ALA) metabolism.R-HSA-2046106	1
839	TRUE	FALSE	FALSE	Tryptophan catabolism.R-HSA-71240	1
840	TRUE	FALSE	FALSE	Ubiquitin Mediated Degradation of Phosphorylated Cdc25A.R-HSA-69601	1
841	TRUE	FALSE	FALSE	Vitamin B1 (thiamin) metabolism.R-HSA-196819	1
842	TRUE	FALSE	FALSE	Vitamin D (calciferol) metabolism.R-HSA-196791	1
843	TRUE	FALSE	FALSE	Vpu mediated degradation of CD4.R-HSA-180534	1
844	TRUE	FALSE	FALSE	Wax and plasmalogen biosynthesis.R-HSA-8848584	1
845	TRUE	FALSE	FALSE	Wax biosynthesis.R-HSA-9640463	1
846	TRUE	FALSE	FALSE	XAV939 inhibits tankyrase, stabilizing AXIN.R-HSA-5545619	1
847	TRUE	FALSE	FALSE	activated TAK1 mediates p38 MAPK activation.R-HSA-450302	1
848	TRUE	FALSE	FALSE	betaKlotho-mediated ligand binding.R-HSA-1307965	1
849	TRUE	FALSE	FALSE	Nucleobase biosynthesis.R-HSA-8956320	1
850	TRUE	FALSE	FALSE	mRNA decay by 5' to 3' exoribonuclease.R-HSA-430039	1
851	TRUE	FALSE	FALSE	p53-Independent DNA Damage Response.R-HSA-69610	1
852	TRUE	FALSE	FALSE	p53-Independent G1-S DNA damage checkpoint.R-HSA-69613	1
853	TRUE	FALSE	FALSE	tRNA processing in the nucleus.R-HSA-6784531	1
854	TRUE	FALSE	FALSE	tRNA processing.R-HSA-72306	1
855	TRUE	FALSE	FALSE	vRNP Assembly.R-HSA-192905	1
856	FALSE	TRUE	FALSE	A tetrasaccharide linker sequence is required for GAG synthesis.R-HSA-1971475	1
857	FALSE	TRUE	FALSE	ABC transporter disorders.R-HSA-5619084	1
858	FALSE	TRUE	FALSE	ARL13B-mediated ciliary trafficking of INPP5E.R-HSA-5624958	1
859	TRUE	FALSE	FALSE	Transport of organic anions.R-HSA-879518	1
860	TRUE	FALSE	FALSE	Toxicity of botulinum toxin type A (BoNT-A).R-HSA-5250968	1
861	TRUE	FALSE	FALSE	The NLRP1 inflammasome.R-HSA-844455	1
862	TRUE	FALSE	FALSE	Tachykinin receptors bind tachykinins.R-HSA-380095	1
863	TRUE	FALSE	FALSE	Phase I - Functionalization of compounds.R-HSA-211945	1
864	TRUE	FALSE	FALSE	Phosphorylation of Emi1.R-HSA-176417	1
865	TRUE	FALSE	FALSE	Postmitotic nuclear pore complex (NPC) reformation.R-HSA-9615933	1
866	TRUE	FALSE	FALSE	Postsynaptic nicotinic acetylcholine receptors.R-HSA-622327	1
867	TRUE	FALSE	FALSE	Presynaptic nicotinic acetylcholine receptors.R-HSA-622323	1
868	TRUE	FALSE	FALSE	Protein repair.R-HSA-5676934	1
869	TRUE	FALSE	FALSE	Purine ribonucleoside monophosphate biosynthesis.R-HSA-73817	1
870	TRUE	FALSE	FALSE	Reduction of cytosolic Ca++ levels.R-HSA-418359	1
871	TRUE	FALSE	FALSE	Regulation of PTEN localization.R-HSA-8948747	1
872	TRUE	FALSE	FALSE	Regulation of PTEN stability and activity.R-HSA-8948751	1
873	TRUE	FALSE	FALSE	Regulation of activated PAK-2p34 by proteasome mediated degradation.R-HSA-211733	1
874	TRUE	FALSE	FALSE	Regulation of gene expression in early pancreatic precursor cells.R-HSA-210747	1
875	TRUE	FALSE	FALSE	Release of Hh-Np from the secreting cell.R-HSA-5362798	1
876	TRUE	FALSE	FALSE	Retinoid cycle disease events.R-HSA-2453864	1
877	TRUE	FALSE	FALSE	Signaling by WNT.R-HSA-195721	1
878	TRUE	FALSE	FALSE	Signalling to p38 via RIT and RIN.R-HSA-187706	1
879	TRUE	FALSE	FALSE	Sodium-Calcium exchangers.R-HSA-425561	1
880	TRUE	FALSE	FALSE	Synthesis of bile acids and bile salts via 24-hydroxycholesterol.R-HSA-193775	1
881	TRUE	FALSE	FALSE	TNFR1-induced NFkappaB signaling pathway.R-HSA-5357956	1
882	FALSE	TRUE	FALSE	Nervous system development.R-HSA-9675108	1
883	FALSE	TRUE	FALSE	Neurophilin interactions with VEGF and VEGFR.R-HSA-194306	1
884	FALSE	FALSE	TRUE	Diseases of signal transduction by growth factor receptors and second messengers.R-HSA-5663202	1
885	FALSE	FALSE	TRUE	CD22 mediated BCR regulation.R-HSA-5690714	1
886	FALSE	FALSE	TRUE	Base Excision Repair.R-HSA-73884	1
887	FALSE	FALSE	TRUE	Base-Excision Repair, AP Site Formation.R-HSA-73929	1
888	FALSE	FALSE	TRUE	Biosynthesis of DHA-derived sulfido conjugates.R-HSA-9026395	1
889	FALSE	FALSE	TRUE	Biosynthesis of protectin and resolvin conjugates in tissue regeneration (PCTR and RCTR).R-HSA-9026766	1
890	FALSE	FALSE	TRUE	Blockage of phagosome acidification.R-HSA-9636467	1
891	FALSE	FALSE	TRUE	Breakdown of the nuclear lamina.R-HSA-352238	1
892	FALSE	FALSE	TRUE	Budding and maturation of HIV virion.R-HSA-162588	1
893	FALSE	FALSE	TRUE	C-type lectin receptors (CLRs).R-HSA-5621481	1
894	FALSE	FALSE	TRUE	CD209 (DC-SIGN) signaling.R-HSA-5621575	1
895	FALSE	FALSE	TRUE	CD28 co-stimulation.R-HSA-389356	1
896	FALSE	FALSE	TRUE	Autophagy.R-HSA-9612973	1
897	FALSE	FALSE	TRUE	CD28 dependent PI3K-Akt signaling.R-HSA-389357	1
898	FALSE	FALSE	TRUE	CLEC7A (Dectin-1) signaling.R-HSA-5607764	1
899	FALSE	FALSE	TRUE	CLEC7A-inflammasome pathway.R-HSA-5660668	1
900	FALSE	FALSE	TRUE	COPI-dependent Golgi-to-ER retrograde traffic.R-HSA-6811434	1
901	FALSE	FALSE	TRUE	COPI-independent Golgi-to-ER retrograde traffic.R-HSA-6811436	1
902	FALSE	FALSE	TRUE	COPI-mediated anterograde transport.R-HSA-6807878	1
903	FALSE	FALSE	TRUE	COPII-mediated vesicle transport.R-HSA-204005	1
904	FALSE	FALSE	TRUE	CREB1 phosphorylation through the activation of CaMKII-CaMKK-CaMKIV cascasde.R-HSA-442729	1
905	FALSE	FALSE	TRUE	CREB3 factors activate genes.R-HSA-8874211	1
906	FALSE	FALSE	TRUE	B-WICH complex positively regulates rRNA expression.R-HSA-5250924	1
907	FALSE	FALSE	TRUE	Association of TriC-CCT with target proteins during biosynthesis.R-HSA-390471	1
908	FALSE	TRUE	FALSE	Non-integrin membrane-ECM interactions.R-HSA-3000171	1
909	FALSE	FALSE	TRUE	Amino acids regulate mTORC1.R-HSA-9639288	1
910	FALSE	FALSE	TRUE	Activation of the TFAP2 (AP-2) family of transcription factors.R-HSA-8866907	1
911	FALSE	FALSE	TRUE	Activation of the pre-replicative complex.R-HSA-68962	1
912	FALSE	FALSE	TRUE	Acyl chain remodeling of CL.R-HSA-1482798	1
913	FALSE	FALSE	TRUE	Acyl chain remodelling of PC.R-HSA-1482788	1
914	FALSE	FALSE	TRUE	Acyl chain remodelling of PE.R-HSA-1482839	1
915	FALSE	FALSE	TRUE	Adaptive Immune System.R-HSA-1280218	1
916	FALSE	FALSE	TRUE	Adenylate cyclase inhibitory pathway.R-HSA-170670	1
917	FALSE	FALSE	TRUE	Adrenaline,noradrenaline inhibits insulin secretion.R-HSA-400042	1
918	FALSE	FALSE	TRUE	Aggrephagy.R-HSA-9646399	1
919	FALSE	FALSE	TRUE	Amyloid fiber formation.R-HSA-977225	1
920	FALSE	FALSE	TRUE	Assembly of the pre-replicative complex.R-HSA-68867	1
921	FALSE	FALSE	TRUE	Antigen Presentation: Folding, assembly and peptide loading of class I MHC.R-HSA-983170	1
922	FALSE	FALSE	TRUE	Antigen activates B Cell Receptor (BCR) leading to generation of second messengers.R-HSA-983695	1
923	FALSE	FALSE	TRUE	Antigen processing: Ubiquitination & Proteasome degradation.R-HSA-983168	1
924	FALSE	FALSE	TRUE	Antiviral mechanism by IFN-stimulated genes.R-HSA-1169410	1
925	FALSE	FALSE	TRUE	Apoptosis induced DNA fragmentation.R-HSA-140342	1
926	FALSE	FALSE	TRUE	Apoptosis.R-HSA-109581	1
927	FALSE	FALSE	TRUE	Apoptotic execution phase.R-HSA-75153	1
928	FALSE	FALSE	TRUE	Asparagine N-linked glycosylation.R-HSA-446203	1
929	FALSE	FALSE	TRUE	Assembly and cell surface presentation of NMDA receptors.R-HSA-9609736	1
930	FALSE	FALSE	TRUE	CaMK IV-mediated phosphorylation of CREB.R-HSA-111932	1
931	FALSE	FALSE	TRUE	Cargo recognition for clathrin-mediated endocytosis.R-HSA-8856825	1
932	FALSE	FALSE	TRUE	Carnitine metabolism.R-HSA-200425	1
933	FALSE	FALSE	TRUE	DNA Replication Pre-Initiation.R-HSA-69002	1
934	FALSE	FALSE	TRUE	Constitutive Signaling by Aberrant PI3K in Cancer.R-HSA-2219530	1
935	FALSE	FALSE	TRUE	Cristae formation.R-HSA-8949613	1
936	FALSE	FALSE	TRUE	DDX58-IFIH1-mediated induction of interferon-alpha-beta.R-HSA-168928	1
937	FALSE	FALSE	TRUE	DNA Damage Bypass.R-HSA-73893	1
938	FALSE	FALSE	TRUE	DNA Damage Recognition in GG-NER.R-HSA-5696394	1
939	FALSE	FALSE	TRUE	DNA Damage-Telomere Stress Induced Senescence.R-HSA-2559586	1
940	FALSE	FALSE	TRUE	DNA Double Strand Break Response.R-HSA-5693606	1
941	FALSE	FALSE	TRUE	DNA Double-Strand Break Repair.R-HSA-5693532	1
942	FALSE	FALSE	TRUE	DNA Repair.R-HSA-73894	1
943	FALSE	FALSE	TRUE	DNA Replication.R-HSA-69306	1
944	FALSE	FALSE	TRUE	Caspase activation via Death Receptors in the presence of ligand.R-HSA-140534	1
945	FALSE	FALSE	TRUE	DNA methylation.R-HSA-5334118	1
946	FALSE	FALSE	TRUE	DNA replication initiation.R-HSA-68952	1
947	FALSE	FALSE	TRUE	DSCAM interactions.R-HSA-376172	1
948	FALSE	FALSE	TRUE	Dectin-1 mediated noncanonical NF-kB signaling.R-HSA-5607761	1
949	FALSE	FALSE	TRUE	Deposition of new CENPA-containing nucleosomes at the centromere.R-HSA-606279	1
950	FALSE	FALSE	TRUE	Depurination.R-HSA-73927	1
951	FALSE	FALSE	TRUE	Depyrimidination.R-HSA-73928	1
952	FALSE	FALSE	TRUE	Deubiquitination.R-HSA-5688426	1
953	FALSE	FALSE	TRUE	Developmental Biology.R-HSA-1266738	1
954	FALSE	FALSE	TRUE	Constitutive Signaling by AKT1 E17K in Cancer.R-HSA-5674400	1
955	FALSE	FALSE	TRUE	Condensation of Prophase Chromosomes.R-HSA-2299718	1
956	FALSE	FALSE	TRUE	Complex I biogenesis.R-HSA-6799198	1
957	FALSE	FALSE	TRUE	Competing endogenous RNAs (ceRNAs) regulate PTEN translation.R-HSA-8948700	1
958	FALSE	FALSE	TRUE	Caspase activation via extrinsic apoptotic signalling pathway.R-HSA-5357769	1
959	FALSE	FALSE	TRUE	Cell Cycle Checkpoints.R-HSA-69620	1
960	FALSE	FALSE	TRUE	Cell Cycle.R-HSA-1640170	1
961	FALSE	FALSE	TRUE	Cell surface interactions at the vascular wall.R-HSA-202733	1
962	FALSE	FALSE	TRUE	Cell-extracellular matrix interactions.R-HSA-446353	1
963	FALSE	FALSE	TRUE	Cellular Senescence.R-HSA-2559583	1
964	FALSE	FALSE	TRUE	Chromatin modifying enzymes.R-HSA-3247509	1
965	FALSE	FALSE	TRUE	Chromatin organization.R-HSA-4839726	1
966	FALSE	FALSE	TRUE	Chromosome Maintenance.R-HSA-73886	1
967	FALSE	FALSE	TRUE	Citric acid cycle (TCA cycle).R-HSA-71403	1
968	FALSE	FALSE	TRUE	Class I MHC mediated antigen processing & presentation.R-HSA-983169	1
969	FALSE	FALSE	TRUE	Class I peroxisomal membrane protein import.R-HSA-9603798	1
970	FALSE	FALSE	TRUE	Classical antibody-mediated complement activation.R-HSA-173623	1
971	FALSE	FALSE	TRUE	Clathrin-mediated endocytosis.R-HSA-8856828	1
972	FALSE	FALSE	TRUE	Cleavage of the damaged purine.R-HSA-110331	1
973	FALSE	FALSE	TRUE	Cleavage of the damaged pyrimidine .R-HSA-110329	1
974	FALSE	FALSE	TRUE	Cobalamin (Cbl, vitamin B12) transport and metabolism.R-HSA-196741	1
975	FALSE	FALSE	TRUE	Coenzyme A biosynthesis.R-HSA-196783	1
976	FALSE	FALSE	TRUE	Collagen degradation.R-HSA-1442490	1
977	FALSE	FALSE	TRUE	Activation of the AP-1 family of transcription factors.R-HSA-450341	1
978	FALSE	FALSE	TRUE	Activation of caspases through apoptosome-mediated cleavage.R-HSA-111459	1
979	FALSE	FALSE	TRUE	Activation of RAC1 downstream of NMDARs.R-HSA-9619229	1
980	FALSE	TRUE	FALSE	Reversal of alkylation damage by DNA dioxygenases.R-HSA-73943	1
981	FALSE	TRUE	FALSE	Regulation of HSF1-mediated heat shock response.R-HSA-3371453	1
982	FALSE	TRUE	FALSE	Regulation of IFNA signaling.R-HSA-912694	1
983	FALSE	TRUE	FALSE	Regulation of Insulin-like Growth Factor (IGF) transport and uptake by Insulin-like Growth Factor Binding Proteins (IGFBPs).R-HSA-381426	1
984	FALSE	TRUE	FALSE	Regulation of TP53 Activity through Association with Co-factors.R-HSA-6804759	1
985	FALSE	TRUE	FALSE	Regulation of TP53 Expression.R-HSA-6804754	1
986	FALSE	TRUE	FALSE	Regulation of innate immune responses to cytosolic DNA.R-HSA-3134975	1
987	FALSE	TRUE	FALSE	Relaxin receptors.R-HSA-444821	1
988	FALSE	TRUE	FALSE	Repression of WNT target genes.R-HSA-4641265	1
989	FALSE	TRUE	FALSE	Retinoid metabolism and transport.R-HSA-975634	1
990	FALSE	TRUE	FALSE	Role of LAT2-NTAL-LAB on calcium mobilization.R-HSA-2730905	1
991	FALSE	TRUE	FALSE	Signaling by ERBB2.R-HSA-1227986	1
992	FALSE	TRUE	FALSE	SDK interactions.R-HSA-373756	1
993	FALSE	TRUE	FALSE	SHC1 events in ERBB4 signaling.R-HSA-1250347	1
994	FALSE	TRUE	FALSE	SLC-mediated transmembrane transport.R-HSA-425407	1
995	FALSE	TRUE	FALSE	SLIT2:ROBO1 increases RHOA activity.R-HSA-8985586	1
996	FALSE	TRUE	FALSE	SMAD2-SMAD3:SMAD4 heterotrimer regulates transcription.R-HSA-2173796	1
997	FALSE	TRUE	FALSE	STING mediated induction of host immune responses.R-HSA-1834941	1
998	FALSE	TRUE	FALSE	SUMOylation of DNA methylation proteins.R-HSA-4655427	1
999	FALSE	TRUE	FALSE	Scavenging by Class A Receptors.R-HSA-3000480	1
1000	FALSE	TRUE	FALSE	Selective autophagy.R-HSA-9663891	1
1001	FALSE	TRUE	FALSE	Regulation of FZD by ubiquitination.R-HSA-4641263	1
1002	FALSE	TRUE	FALSE	RUNX3 regulates YAP1-mediated transcription.R-HSA-8951671	1
1003	FALSE	TRUE	FALSE	RUNX1 regulates transcription of genes involved in interleukin signaling.R-HSA-8939247	1
1004	FALSE	TRUE	FALSE	RUNX1 regulates transcription of genes involved in WNT signaling.R-HSA-8939256	1
1005	FALSE	TRUE	FALSE	Noncanonical activation of NOTCH3.R-HSA-9017802	1
1006	FALSE	TRUE	FALSE	NrCAM interactions.R-HSA-447038	1
1007	FALSE	TRUE	FALSE	O-linked glycosylation.R-HSA-5173105	1
1008	FALSE	TRUE	FALSE	Other semaphorin interactions.R-HSA-416700	1
1009	FALSE	TRUE	FALSE	PI3K events in ERBB2 signaling.R-HSA-1963642	1
1010	FALSE	TRUE	FALSE	PI3K events in ERBB4 signaling.R-HSA-1250342	1
1011	FALSE	TRUE	FALSE	PLCG1 events in ERBB2 signaling.R-HSA-1251932	1
1012	FALSE	TRUE	FALSE	PTK6 Regulates Cell Cycle.R-HSA-8849470	1
1013	FALSE	TRUE	FALSE	PTK6 Regulates RTKs and Their Effectors AKT1 and DOK1.R-HSA-8849469	1
1014	FALSE	TRUE	FALSE	Pexophagy.R-HSA-9664873	1
1015	FALSE	TRUE	FALSE	Plasma lipoprotein assembly.R-HSA-8963898	1
1016	FALSE	TRUE	FALSE	Post-translational modification: synthesis of GPI-anchored proteins.R-HSA-163125	1
1017	FALSE	TRUE	FALSE	Pre-NOTCH Processing in Golgi.R-HSA-1912420	1
1018	FALSE	TRUE	FALSE	Pre-NOTCH Processing in the Endoplasmic Reticulum.R-HSA-1912399	1
1019	FALSE	TRUE	FALSE	Pregnenolone biosynthesis.R-HSA-196108	1
1020	FALSE	TRUE	FALSE	Proton-coupled neutral amino acid transporters.R-HSA-428559	1
1021	FALSE	TRUE	FALSE	RA biosynthesis pathway.R-HSA-5365859	1
1022	FALSE	TRUE	FALSE	RUNX1 and FOXP3 control the development of regulatory T lymphocytes (Tregs).R-HSA-8877330	1
1023	FALSE	TRUE	FALSE	RUNX1 regulates transcription of genes involved in BCR signaling.R-HSA-8939245	1
1024	FALSE	TRUE	FALSE	Signaling by BMP.R-HSA-201451	1
1025	FALSE	TRUE	FALSE	Signaling by ERBB4.R-HSA-1236394	1
1026	FALSE	FALSE	TRUE	Activation of Na-permeable kainate receptors.R-HSA-451307	1
1027	FALSE	FALSE	TRUE	APEX1-Independent Resolution of AP Sites via the Single Nucleotide Replacement Pathway.R-HSA-5649702	1
1028	FALSE	TRUE	FALSE	VLDL clearance.R-HSA-8964046	1
1029	FALSE	TRUE	FALSE	Visual phototransduction.R-HSA-2187338	1
1030	FALSE	TRUE	FALSE	YAP1- and WWTR1 (TAZ)-stimulated gene expression.R-HSA-2032785	1
1031	FALSE	TRUE	FALSE	cGMP effects.R-HSA-418457	1
1032	FALSE	FALSE	TRUE	ABC-family proteins mediated transport.R-HSA-382556	1
1033	FALSE	FALSE	TRUE	ADP signalling through P2Y purinoceptor 1.R-HSA-418592	1
1034	FALSE	FALSE	TRUE	AKT phosphorylates targets in the cytosol.R-HSA-198323	1
1035	FALSE	FALSE	TRUE	AKT phosphorylates targets in the nucleus.R-HSA-198693	1
1036	FALSE	FALSE	TRUE	AKT-mediated inactivation of FOXO1A.R-HSA-211163	1
1037	FALSE	FALSE	TRUE	Abortive elongation of HIV-1 transcript in the absence of Tat.R-HSA-167242	1
1038	FALSE	TRUE	FALSE	Signaling by FGFR2 IIIa TM.R-HSA-8851708	1
1039	FALSE	FALSE	TRUE	Acetylcholine Neurotransmitter Release Cycle.R-HSA-264642	1
1040	FALSE	FALSE	TRUE	Activated NTRK2 signals through CDK5.R-HSA-9032845	1
1041	FALSE	FALSE	TRUE	Activated NTRK2 signals through PLCG1.R-HSA-9026527	1
1042	FALSE	FALSE	TRUE	Activated PKN1 stimulates transcription of AR (androgen receptor) regulated genes KLK2 and KLK3.R-HSA-5625886	1
1043	FALSE	FALSE	TRUE	Activation of ATR in response to replication stress.R-HSA-176187	1
1044	FALSE	FALSE	TRUE	Activation of BAD and translocation to mitochondria .R-HSA-111447	1
1045	FALSE	FALSE	TRUE	Activation of BH3-only proteins.R-HSA-114452	1
1046	FALSE	FALSE	TRUE	Activation of IRF3-IRF7 mediated by TBK1-IKK epsilon.R-HSA-936964	1
1047	FALSE	FALSE	TRUE	Activation of NMDA receptors and postsynaptic events.R-HSA-442755	1
1048	FALSE	TRUE	FALSE	Ubiquitin-dependent degradation of Cyclin D.R-HSA-75815	1
1049	FALSE	TRUE	FALSE	Triglyceride biosynthesis.R-HSA-75109	1
1050	FALSE	TRUE	FALSE	Transport of vitamins, nucleosides, and related molecules.R-HSA-425397	1
1051	FALSE	TRUE	FALSE	Transport of nucleosides and free purine and pyrimidine bases across the plasma membrane.R-HSA-83936	1
1052	FALSE	TRUE	FALSE	Signaling by FGFR2 amplification mutants.R-HSA-2023837	1
1053	FALSE	TRUE	FALSE	Signaling by FGFR2 fusions.R-HSA-8853333	1
1054	FALSE	TRUE	FALSE	Signaling by FGFR3 fusions in cancer.R-HSA-8853334	1
1055	FALSE	TRUE	FALSE	Signaling by GPCR.R-HSA-372790	1
1056	FALSE	TRUE	FALSE	Signaling by NOTCH1 t(7
1057	FALSE	TRUE	FALSE	Striated Muscle Contraction.R-HSA-390522	1
1058	FALSE	TRUE	FALSE	Sulfur amino acid metabolism.R-HSA-1614635	1
1059	FALSE	TRUE	FALSE	Synthesis of Dolichyl-phosphate.R-HSA-446199	1
1060	FALSE	TRUE	FALSE	Synthesis of substrates in N-glycan biosythesis.R-HSA-446219	1
1061	TRUE	FALSE	FALSE	ADORA2B mediated anti-inflammatory cytokines production.R-HSA-9660821	1
1062	FALSE	TRUE	FALSE	TGF-beta receptor signaling activates SMADs.R-HSA-2173789	1
1063	FALSE	TRUE	FALSE	TGF-beta receptor signaling in EMT (epithelial to mesenchymal transition).R-HSA-2173791	1
1064	FALSE	TRUE	FALSE	TNF receptor superfamily (TNFSF) members mediating non-canonical NF-kB pathway.R-HSA-5676594	1
1065	FALSE	TRUE	FALSE	TP53 Regulates Transcription of Genes Involved in Cytochrome C Release.R-HSA-6803204	1
1066	FALSE	TRUE	FALSE	TP53 regulates transcription of several additional cell death genes whose specific roles in p53-dependent apoptosis remain uncertain.R-HSA-6803205	1
1067	FALSE	TRUE	FALSE	Tight junction interactions.R-HSA-420029	1
1068	FALSE	TRUE	FALSE	Transcriptional Regulation by VENTX.R-HSA-8853884	1
1069	FALSE	TRUE	FALSE	Transport of connexins along the secretory pathway.R-HSA-190827	1
1070	FALSE	TRUE	FALSE	Transport of connexons to the plasma membrane.R-HSA-190872	1
1071	FALSE	FALSE	TRUE	tRNA modification in the nucleus and cytosol.R-HSA-6782315	1

## Sheet: group 1 down
	Ataxia-telangiectasia	Cockayne syndrome	XPA	id	num
0	TRUE	TRUE	TRUE	Rev-mediated nuclear export of HIV RNA.R-HSA-165054	3		DNA damage response
1	TRUE	TRUE	TRUE	VxPx cargo-targeting to cilium.R-HSA-5620916	3		Transcription
2	TRUE	TRUE	TRUE	Nuclear import of Rev protein.R-HSA-180746	3
3	TRUE	TRUE	TRUE	Organic cation-anion-zwitterion transport.R-HSA-549132	3
4	TRUE	TRUE	TRUE	Oxygen-dependent proline hydroxylation of Hypoxia-inducible Factor Alpha.R-HSA-1234176	3
5	TRUE	TRUE	TRUE	Export of Viral Ribonucleoproteins from Nucleus.R-HSA-168274	3
6	TRUE	TRUE	TRUE	mRNA Splicing.R-HSA-72172	3
7	TRUE	TRUE	TRUE	mRNA Editing: A to I Conversion.R-HSA-75064	3
8	TRUE	TRUE	TRUE	Effects of PIP2 hydrolysis.R-HSA-114508	3
9	TRUE	TRUE	TRUE	EGR2 and SOX10-mediated initiation of Schwann cell myelination.R-HSA-9619665	3
10	TRUE	TRUE	TRUE	Transport of the SLBP independent Mature mRNA.R-HSA-159227	3
11	TRUE	TRUE	TRUE	Signaling by ROBO receptors.R-HSA-376176	3
12	TRUE	TRUE	TRUE	Transport of the SLBP Dependant Mature mRNA.R-HSA-159230	3
13	TRUE	TRUE	TRUE	Downregulation of SMAD2-3:SMAD4 transcriptional activity.R-HSA-2173795	3
14	TRUE	TRUE	TRUE	Transport of Ribonucleoproteins into the Host Nucleus.R-HSA-168271	3
15	TRUE	TRUE	TRUE	Transport of Mature mRNAs Derived from Intronless Transcripts.R-HSA-159234	3
16	TRUE	TRUE	TRUE	Transport of Mature mRNA Derived from an Intronless Transcript.R-HSA-159231	3
17	TRUE	TRUE	TRUE	Deadenylation-dependent mRNA decay.R-HSA-429914	3
18	TRUE	TRUE	TRUE	Deadenylation of mRNA.R-HSA-429947	3
19	TRUE	TRUE	TRUE	Suppression of phagosomal maturation.R-HSA-9637687	3
20	TRUE	TRUE	TRUE	Nuclear Pore Complex (NPC) Disassembly.R-HSA-3301854	3
21	TRUE	TRUE	TRUE	Nuclear Envelope Breakdown.R-HSA-2980766	3
22	TRUE	TRUE	TRUE	Formation of editosomes by ADAR proteins.R-HSA-77042	3
23	TRUE	TRUE	TRUE	Negative regulation of MET activity.R-HSA-6807004	3
24	TRUE	TRUE	TRUE	Listeria monocytogenes entry into host cells.R-HSA-8876384	3
25	TRUE	TRUE	TRUE	Intra-Golgi traffic.R-HSA-6811438	3
26	TRUE	TRUE	TRUE	MAPK6-MAPK4 signaling.R-HSA-5687128	3
27	TRUE	TRUE	TRUE	Interactions of Rev with host cellular proteins.R-HSA-177243	3
28	TRUE	TRUE	TRUE	Inhibition of nitric oxide production.R-HSA-9636249	3
29	TRUE	TRUE	TRUE	Methylation.R-HSA-156581	3
30	TRUE	TRUE	TRUE	Mitotic Anaphase.R-HSA-68882	3
31	TRUE	TRUE	TRUE	Mitotic Metaphase and Anaphase.R-HSA-2555396	3
32	TRUE	TRUE	TRUE	Mitotic Telophase-Cytokinesis.R-HSA-68884	3
33	TRUE	TRUE	TRUE	HuR (ELAVL1) binds and stabilizes mRNA.R-HSA-450520	3
34	TRUE	TRUE	TRUE	NEP-NS2 Interacts with the Cellular Export Machinery.R-HSA-168333	3
35	TRUE	TRUE	TRUE	HIV Transcription Initiation.R-HSA-167161	3
36	TRUE	TRUE	TRUE	HCMV Early Events.R-HSA-9609690	3
37	TRUE	TRUE	TRUE	NS1 Mediated Effects on Host Pathways.R-HSA-168276	3
38	TRUE	TRUE	TRUE	Negative regulation of FGFR2 signaling.R-HSA-5654727	3
39	TRUE	TRUE	TRUE	Gastrin-CREB signalling pathway via PKC and MAPK.R-HSA-881907	3
40	TRUE	TRUE	TRUE	Negative regulation of FGFR3 signaling.R-HSA-5654732	3
41	TRUE	TRUE	TRUE	RHO GTPases Activate Formins.R-HSA-5663220	3
42	TRUE	TRUE	TRUE	mRNA Splicing - Major Pathway.R-HSA-72163	3
43	TRUE	TRUE	TRUE	Cell Cycle, Mitotic.R-HSA-69278	3
44	TRUE	TRUE	TRUE	Signaling by FGFR.R-HSA-190236	3
45	TRUE	TRUE	TRUE	Cargo concentration in the ER.R-HSA-5694530	3
46	TRUE	TRUE	TRUE	Activation of RAC1.R-HSA-428540	3
47	TRUE	TRUE	TRUE	STAT5 Activation.R-HSA-9645135	3
48	TRUE	TRUE	TRUE	RNA Polymerase II Transcription.R-HSA-73857	3
49	TRUE	TRUE	TRUE	Resolution of Sister Chromatid Cohesion.R-HSA-2500257	3
50	TRUE	TRUE	TRUE	RNA Polymerase II Transcription Pre-Initiation And Promoter Opening.R-HSA-73779	3
51	TRUE	TRUE	TRUE	Cellular response to hypoxia.R-HSA-1234174	3
52	TRUE	TRUE	TRUE	RNA Polymerase II Transcription Initiation.R-HSA-75953	3
53	TRUE	TRUE	TRUE	RNA Polymerase II Transcription Initiation And Promoter Clearance.R-HSA-76042	3
54	TRUE	TRUE	TRUE	RNA Polymerase II Promoter Escape.R-HSA-73776	3
55	TRUE	TRUE	TRUE	RNA Polymerase II HIV Promoter Escape.R-HSA-167162	3
56	TRUE	TRUE	TRUE	Rap1 signalling.R-HSA-392517	3
57	TRUE	TRUE	TRUE	SUMOylation of transcription cofactors.R-HSA-3899300	3
58	TRUE	TRUE	TRUE	C6 deamination of adenosine.R-HSA-75102	3
59	TRUE	TRUE	TRUE	Regulation of gene expression by Hypoxia-inducible Factor.R-HSA-1234158	3
60	TRUE	TRUE	TRUE	Separation of Sister Chromatids.R-HSA-2467813	3
61	TRUE	TRUE	TRUE	Cohesin Loading onto Chromatin.R-HSA-2470946	3
62	TRUE	TRUE	TRUE	RNA Polymerase I Transcription Initiation.R-HSA-73762	3
63	TRUE	TRUE	TRUE	SHC-mediated cascade:FGFR1.R-HSA-5654688	3
64	FALSE	TRUE	TRUE	Cap-dependent Translation Initiation.R-HSA-72737	2
65	TRUE	FALSE	TRUE	Scavenging by Class B Receptors.R-HSA-3000471	2
66	FALSE	TRUE	TRUE	Calmodulin induced events.R-HSA-111933	2
67	TRUE	TRUE	FALSE	SUMOylation of ubiquitinylation proteins.R-HSA-3232142	2
68	FALSE	TRUE	TRUE	Amino acid transport across the plasma membrane.R-HSA-352230	2
69	TRUE	FALSE	TRUE	SUMOylation.R-HSA-2990846	2
70	FALSE	TRUE	TRUE	Amplification of signal from unattached kinetochores via a MAD2 inhibitory signal.R-HSA-141444	2
71	FALSE	TRUE	TRUE	Calcineurin activates NFAT.R-HSA-2025928	2
72	FALSE	TRUE	TRUE	Beta-catenin phosphorylation cascade.R-HSA-196299	2
73	FALSE	TRUE	TRUE	Amplification of signal from the kinetochores.R-HSA-141424	2
74	FALSE	TRUE	TRUE	CaM pathway.R-HSA-111997	2
75	TRUE	FALSE	TRUE	Scavenging by Class A Receptors.R-HSA-3000480	2
76	FALSE	TRUE	TRUE	Autodegradation of Cdh1 by Cdh1:APC-C.R-HSA-174084	2
77	FALSE	TRUE	TRUE	Cargo trafficking to the periciliary membrane.R-HSA-5620920	2
78	FALSE	TRUE	TRUE	CREB1 phosphorylation through the activation of Adenylate Cyclase.R-HSA-442720	2
79	FALSE	TRUE	TRUE	Ca-dependent events.R-HSA-111996	2
80	TRUE	FALSE	TRUE	Signaling by SCF-KIT.R-HSA-1433557	2
81	FALSE	TRUE	TRUE	Cdc20:Phospho-APC-C mediated degradation of Cyclin A.R-HSA-174184	2
82	FALSE	TRUE	TRUE	Degradation of AXIN.R-HSA-4641257	2
83	FALSE	TRUE	TRUE	Dual incision in TC-NER.R-HSA-6782135	2
84	TRUE	FALSE	TRUE	Role of ABL in ROBO-SLIT signaling.R-HSA-428890	2
85	TRUE	FALSE	TRUE	Role of second messengers in netrin-1 signaling.R-HSA-418890	2
86	FALSE	TRUE	TRUE	Downstream signaling of activated FGFR1.R-HSA-5654687	2
87	FALSE	TRUE	TRUE	Downstream signaling events of B Cell Receptor (BCR).R-HSA-1168372	2
88	FALSE	TRUE	TRUE	Downstream TCR signaling.R-HSA-202424	2
89	FALSE	TRUE	TRUE	Detoxification of Reactive Oxygen Species.R-HSA-3299685	2
90	FALSE	TRUE	TRUE	Degradation of beta-catenin by the destruction complex.R-HSA-195253	2
91	FALSE	TRUE	TRUE	DEx-H-box helicases activate type I IFN and inflammatory cytokines production .R-HSA-3134963	2
92	TRUE	TRUE	FALSE	SUMOylation of RNA binding proteins.R-HSA-4570464	2
93	TRUE	FALSE	TRUE	SLIT2:ROBO1 increases RHOA activity.R-HSA-8985586	2
94	FALSE	TRUE	TRUE	DAG and IP3 signaling.R-HSA-1489509	2
95	FALSE	TRUE	TRUE	Cooperation of Prefoldin and TriC-CCT in actin and tubulin folding.R-HSA-389958	2
96	FALSE	TRUE	TRUE	Cooperation of PDCL (PhLP1) and TRiC-CCT in G-protein beta folding.R-HSA-6814122	2
97	FALSE	TRUE	TRUE	Conversion from APC-C:Cdc20 to APC-C:Cdh1 in late anaphase.R-HSA-176407	2
98	FALSE	TRUE	TRUE	Circadian Clock.R-HSA-400253	2
99	FALSE	TRUE	TRUE	Activation, translocation and oligomerization of BAX.R-HSA-114294	2
100	FALSE	TRUE	TRUE	Chaperonin-mediated protein folding.R-HSA-390466	2
101	FALSE	TRUE	TRUE	Adenylate cyclase activating pathway.R-HSA-170660	2
102	FALSE	TRUE	TRUE	Activation of AMPK downstream of NMDARs.R-HSA-9619483	2
103	TRUE	FALSE	TRUE	Sema4D in semaphorin signaling.R-HSA-400685	2
104	TRUE	FALSE	TRUE	Sensing of DNA Double Strand Breaks.R-HSA-5693548	2
105	FALSE	TRUE	TRUE	E2F-enabled inhibition of pre-replication complex formation.R-HSA-113507	2
106	TRUE	FALSE	TRUE	mRNA Capping.R-HSA-72086	2
107	TRUE	FALSE	TRUE	mRNA 3'-end processing.R-HSA-72187	2
108	TRUE	FALSE	TRUE	Uptake and function of diphtheria toxin.R-HSA-5336415	2
109	FALSE	TRUE	TRUE	Uptake and actions of bacterial toxins.R-HSA-5339562	2
110	TRUE	FALSE	TRUE	Transport of connexons to the plasma membrane.R-HSA-190872	2
111	TRUE	FALSE	TRUE	Transport of connexins along the secretory pathway.R-HSA-190827	2
112	TRUE	FALSE	TRUE	Signaling by MST1.R-HSA-8852405	2
113	TRUE	FALSE	TRUE	Signaling by NOTCH1 HD+PEST Domain Mutants in Cancer.R-HSA-2894858	2
114	TRUE	TRUE	FALSE	Transcriptional regulation of pluripotent stem cells.R-HSA-452723	2
115	TRUE	FALSE	TRUE	Transcriptional regulation by RUNX3.R-HSA-8878159	2
116	TRUE	FALSE	TRUE	Transcriptional activity of SMAD2-SMAD3:SMAD4 heterotrimer.R-HSA-2173793	2
117	TRUE	FALSE	TRUE	Transcriptional Regulation by TP53.R-HSA-3700989	2
118	TRUE	TRUE	FALSE	Toxicity of botulinum toxin type B (BoNT-B).R-HSA-5250958	2
119	TRUE	TRUE	FALSE	Tie2 Signaling.R-HSA-210993	2
120	TRUE	FALSE	TRUE	TGF-beta receptor signaling in EMT (epithelial to mesenchymal transition).R-HSA-2173791	2
121	TRUE	FALSE	TRUE	Signaling by NOTCH1 PEST Domain Mutants in Cancer.R-HSA-2644602	2
122	TRUE	FALSE	TRUE	Signaling by NOTCH1.R-HSA-1980143	2
123	TRUE	FALSE	TRUE	Signaling by Type 1 Insulin-like Growth Factor 1 Receptor (IGF1R).R-HSA-2404192	2
124	TRUE	FALSE	TRUE	Signaling by Leptin.R-HSA-2586552	2
125	FALSE	TRUE	TRUE	APC-C-mediated degradation of cell cycle proteins.R-HSA-174143	2
126	FALSE	TRUE	TRUE	APC-C:Cdc20 mediated degradation of Cyclin B.R-HSA-174048	2
127	FALSE	TRUE	TRUE	Activated NTRK2 signals through FRS2 and FRS3.R-HSA-9028731	2
128	TRUE	FALSE	TRUE	Signaling by BMP.R-HSA-201451	2
129	FALSE	TRUE	TRUE	Activation, myristolyation of BID and translocation to mitochondria.R-HSA-75108	2
130	FALSE	TRUE	TRUE	Activation of the mRNA upon binding of the cap-binding complex and eIFs, and subsequent binding to 43S.R-HSA-72662	2
131	FALSE	TRUE	TRUE	Activation of APC-C and APC-C:Cdc20 mediated degradation of mitotic proteins.R-HSA-176814	2
132	TRUE	FALSE	TRUE	Signaling by TGFB family members.R-HSA-9006936	2
133	FALSE	TRUE	TRUE	Activation of AKT2.R-HSA-165158	2
134	FALSE	TRUE	TRUE	Activated NTRK2 signals through FYN.R-HSA-9032500	2
135	TRUE	FALSE	TRUE	Signaling by FGFR2 in disease.R-HSA-5655253	2
136	FALSE	TRUE	TRUE	Acetylcholine regulates insulin secretion.R-HSA-399997	2
137	FALSE	TRUE	TRUE	APC-C:Cdc20 mediated degradation of Securin.R-HSA-174154	2
138	FALSE	TRUE	TRUE	Abasic sugar-phosphate removal via the single-nucleotide replacement pathway.R-HSA-73930	2
139	FALSE	TRUE	TRUE	ARMS-mediated activation.R-HSA-170984	2
140	TRUE	FALSE	TRUE	Signaling by FGFR2.R-HSA-5654738	2
141	FALSE	TRUE	TRUE	APC:Cdc20 mediated degradation of cell cycle proteins prior to satisfation of the cell cycle checkpoint.R-HSA-179419	2
142	TRUE	FALSE	TRUE	Signaling by Hedgehog.R-HSA-5358351	2
143	FALSE	TRUE	TRUE	APC-Cdc20 mediated degradation of Nek2A.R-HSA-179409	2
144	FALSE	TRUE	TRUE	APC-C:Cdh1 mediated degradation of Cdc20 and other APC-C:Cdh1 targeted proteins in late mitosis-early G1.R-HSA-174178	2
145	FALSE	TRUE	TRUE	APC-C:Cdc20 mediated degradation of mitotic proteins.R-HSA-176409	2
146	FALSE	TRUE	TRUE	E2F mediated regulation of DNA replication.R-HSA-113510	2
147	FALSE	TRUE	TRUE	LRR FLII-interacting protein 1 (LRRFIP1) activates type I IFN production.R-HSA-3134973	2
148	FALSE	TRUE	TRUE	EML4 and NUDC in mitotic spindle formation.R-HSA-9648025	2
149	FALSE	TRUE	TRUE	RUNX1 interacts with co-factors whose precise effect on RUNX1 targets is not known.R-HSA-8939243	2
150	FALSE	TRUE	TRUE	SLBP Dependent Processing of Replication-Dependent Histone Pre-mRNAs.R-HSA-77588	2
151	FALSE	TRUE	TRUE	SCF-beta-TrCP mediated degradation of Emi1.R-HSA-174113	2
152	FALSE	TRUE	TRUE	Ribosomal scanning and start codon recognition.R-HSA-72702	2
153	FALSE	TRUE	TRUE	Resolution of D-loop Structures through Synthesis-Dependent Strand Annealing (SDSA).R-HSA-5693554	2
154	FALSE	TRUE	TRUE	Resolution of D-loop Structures through Holliday Junction Intermediates.R-HSA-5693568	2
155	FALSE	TRUE	TRUE	Resolution of D-Loop Structures.R-HSA-5693537	2
156	FALSE	TRUE	TRUE	Regulation of mitotic cell cycle.R-HSA-453276	2
157	FALSE	TRUE	TRUE	Regulation of TP53 Degradation.R-HSA-6804757	2
158	FALSE	TRUE	TRUE	Regulation of RUNX1 Expression and Activity.R-HSA-8934593	2
159	FALSE	TRUE	TRUE	Regulation of PTEN stability and activity.R-HSA-8948751	2
160	FALSE	TRUE	TRUE	Regulation of PTEN localization.R-HSA-8948747	2
161	FALSE	TRUE	TRUE	Regulation of APC-C activators between G1-S and early anaphase.R-HSA-176408	2
162	FALSE	TRUE	TRUE	RUNX1 regulates estrogen receptor mediated transcription.R-HSA-8931987	2
163	FALSE	TRUE	TRUE	RORA activates gene expression.R-HSA-1368082	2
164	FALSE	TRUE	TRUE	SOS-mediated signalling.R-HSA-112412	2
165	FALSE	TRUE	TRUE	ROBO receptors bind AKAP5.R-HSA-9010642	2
166	FALSE	TRUE	TRUE	RNA Polymerase III Transcription.R-HSA-74158	2
167	FALSE	TRUE	TRUE	RNA Polymerase III Transcription Termination.R-HSA-73980	2
168	FALSE	TRUE	TRUE	RNA Polymerase III Transcription Initiation.R-HSA-76046	2
169	FALSE	TRUE	TRUE	RNA Polymerase III Transcription Initiation From Type 3 Promoter.R-HSA-76071	2
170	FALSE	TRUE	TRUE	RNA Polymerase III Transcription Initiation From Type 2 Promoter.R-HSA-76066	2
171	FALSE	TRUE	TRUE	RNA Polymerase III Transcription Initiation From Type 1 Promoter.R-HSA-76061	2
172	FALSE	TRUE	TRUE	RNA Polymerase III Chain Elongation.R-HSA-73780	2
173	FALSE	TRUE	TRUE	RNA Polymerase III Abortive And Retractive Initiation.R-HSA-749476	2
174	FALSE	TRUE	TRUE	RNA Polymerase II Transcription Elongation.R-HSA-75955	2
175	FALSE	TRUE	TRUE	Purine ribonucleoside monophosphate biosynthesis.R-HSA-73817	2
176	FALSE	TRUE	TRUE	Protein repair.R-HSA-5676934	2
177	FALSE	TRUE	TRUE	Processing of Capped Intronless Pre-mRNA.R-HSA-75067	2
178	FALSE	TRUE	TRUE	SLBP independent Processing of Histone Pre-mRNAs.R-HSA-111367	2
179	FALSE	TRUE	TRUE	SUMOylation of DNA replication proteins.R-HSA-4615885	2
180	FALSE	TRUE	TRUE	Establishment of Sister Chromatid Cohesion.R-HSA-2468052	2
181	FALSE	TRUE	TRUE	rRNA processing in the nucleus and cytosol.R-HSA-8868773	2
182	FALSE	TRUE	TRUE	Transport of inorganic cations-anions and amino acids-oligopeptides.R-HSA-425393	2
183	FALSE	TRUE	TRUE	Transport of Mature mRNA derived from an Intron-Containing Transcript.R-HSA-159236	2
184	FALSE	TRUE	TRUE	Transport of Mature Transcript to Cytoplasm.R-HSA-72202	2
185	FALSE	TRUE	TRUE	Translocation of SLC2A4 (GLUT4) to the plasma membrane.R-HSA-1445148	2
186	FALSE	TRUE	TRUE	Vpr-mediated nuclear import of PICs.R-HSA-180910	2
187	FALSE	TRUE	TRUE	Translesion Synthesis by POLH.R-HSA-110320	2
188	FALSE	TRUE	TRUE	Translation initiation complex formation.R-HSA-72649	2
189	FALSE	TRUE	TRUE	Transcriptional Regulation by E2F6.R-HSA-8953750	2
190	FALSE	TRUE	TRUE	Transcription-Coupled Nucleotide Excision Repair (TC-NER).R-HSA-6781827	2
191	FALSE	TRUE	TRUE	Transcription of the HIV genome.R-HSA-167172	2
192	FALSE	TRUE	TRUE	Transcription of E2F targets under negative control by DREAM complex.R-HSA-1362277	2
193	FALSE	TRUE	TRUE	mRNA decay by 5' to 3' exoribonuclease.R-HSA-430039	2
194	FALSE	TRUE	TRUE	p38MAPK events.R-HSA-171007	2
195	FALSE	TRUE	TRUE	rRNA processing.R-HSA-72312	2
196	FALSE	TRUE	TRUE	Signaling by FGFR1.R-HSA-5654736	2
197	FALSE	TRUE	TRUE	snRNP Assembly.R-HSA-191859	2
198	FALSE	TRUE	TRUE	tRNA processing in the nucleus.R-HSA-6784531	2
199	FALSE	TRUE	TRUE	TP53 Regulates Transcription of Genes Involved in G2 Cell Cycle Arrest.R-HSA-6804114	2
200	FALSE	TRUE	TRUE	TP53 Regulates Transcription of DNA Repair Genes.R-HSA-6796648	2
201	FALSE	TRUE	TRUE	TET1,2,3 and TDG demethylate DNA.R-HSA-5221030	2
202	FALSE	TRUE	TRUE	tRNA processing.R-HSA-72306	2
203	FALSE	TRUE	TRUE	vRNP Assembly.R-HSA-192905	2
204	FALSE	TRUE	TRUE	Assembly of the ORC complex at the origin of replication.R-HSA-68616	2
205	FALSE	TRUE	TRUE	Synthesis of IP2, IP, and Ins in the cytosol.R-HSA-1855183	2
206	FALSE	TRUE	TRUE	Spry regulation of FGF signaling.R-HSA-1295596	2
207	FALSE	TRUE	TRUE	Small interfering RNA (siRNA) biogenesis.R-HSA-426486	2
208	FALSE	TRUE	TRUE	Signaling by activated point mutants of FGFR1.R-HSA-1839122	2
209	FALSE	TRUE	TRUE	Signaling by Receptor Tyrosine Kinases.R-HSA-9006934	2
210	FALSE	TRUE	TRUE	Processing of Capped Intron-Containing Pre-mRNA.R-HSA-72203	2
211	FALSE	TRUE	TRUE	Presynaptic phase of homologous DNA pairing and strand exchange.R-HSA-5693616	2
212	FALSE	TRUE	TRUE	Post-transcriptional silencing by small RNAs.R-HSA-426496	2
213	FALSE	TRUE	TRUE	Free fatty acids regulate insulin secretion.R-HSA-400451	2
214	FALSE	TRUE	TRUE	Initiation of Nuclear Envelope (NE) Reformation.R-HSA-2995383	2
215	FALSE	TRUE	TRUE	Inhibition of the proteolytic activity of APC-C required for the onset of anaphase by mitotic spindle checkpoint components.R-HSA-141405	2
216	FALSE	TRUE	TRUE	Infectious disease.R-HSA-5663205	2
217	FALSE	TRUE	TRUE	Inactivation of APC-C via direct inhibition of the APC-C complex.R-HSA-141430	2
218	FALSE	TRUE	TRUE	IRS-related events triggered by IGF1R.R-HSA-2428928	2
219	FALSE	TRUE	TRUE	IRS-mediated signalling.R-HSA-112399	2
220	FALSE	TRUE	TRUE	Host Interactions of HIV factors.R-HSA-162909	2
221	FALSE	TRUE	TRUE	Homologous DNA Pairing and Strand Exchange.R-HSA-5693579	2
222	FALSE	TRUE	TRUE	HIV Life Cycle.R-HSA-162587	2
223	FALSE	TRUE	TRUE	HIV Infection.R-HSA-162906	2
224	FALSE	TRUE	TRUE	HDR through Homologous Recombination (HRR).R-HSA-5685942	2
225	FALSE	TRUE	TRUE	Gap-filling DNA repair synthesis and ligation in TC-NER.R-HSA-6782210	2
226	FALSE	TRUE	TRUE	G1-S-Specific Transcription.R-HSA-69205	2
227	FALSE	TRUE	TRUE	Formation of the ternary complex, and subsequently, the 43S complex.R-HSA-72695	2
228	FALSE	TRUE	TRUE	Phosphorylation of the APC-C.R-HSA-176412	2
229	FALSE	TRUE	TRUE	Formation of TC-NER Pre-Incision Complex.R-HSA-6781823	2
230	FALSE	TRUE	TRUE	Folding of actin by CCT-TriC.R-HSA-390450	2
231	FALSE	TRUE	TRUE	FRS-mediated FGFR3 signaling.R-HSA-5654706	2
232	FALSE	TRUE	TRUE	FRS-mediated FGFR2 signaling.R-HSA-5654700	2
233	FALSE	TRUE	TRUE	FRS-mediated FGFR1 signaling.R-HSA-5654693	2
234	FALSE	TRUE	TRUE	FGFRL1 modulation of FGFR1 signaling.R-HSA-5658623	2
235	TRUE	FALSE	TRUE	Retrograde transport at the Trans-Golgi-Network.R-HSA-6811440	2
236	FALSE	TRUE	TRUE	FGFR1b ligand binding and activation.R-HSA-190370	2
237	FALSE	TRUE	TRUE	FGFR1 ligand binding and activation.R-HSA-190242	2
238	FALSE	TRUE	TRUE	FCERI mediated NF-kB activation.R-HSA-2871837	2
239	FALSE	TRUE	TRUE	FBXL7 down-regulates AURKA during mitotic entry and in early mitosis.R-HSA-8854050	2
240	FALSE	TRUE	TRUE	Eukaryotic Translation Initiation.R-HSA-72613	2
241	FALSE	TRUE	TRUE	Estrogen biosynthesis.R-HSA-193144	2
242	FALSE	TRUE	TRUE	Inositol phosphate metabolism.R-HSA-1483249	2
243	FALSE	TRUE	TRUE	Insulin processing.R-HSA-264876	2
244	FALSE	TRUE	TRUE	Interactions of Vpr with host cellular proteins.R-HSA-176033	2
245	FALSE	TRUE	TRUE	Intestinal absorption.R-HSA-8963676	2
246	FALSE	TRUE	TRUE	Phospholipase C-mediated cascade: FGFR1.R-HSA-5654219	2
247	FALSE	TRUE	TRUE	PKA-mediated phosphorylation of CREB.R-HSA-111931	2
248	FALSE	TRUE	TRUE	PKA activation.R-HSA-163615	2
249	FALSE	TRUE	TRUE	PKA activation in glucagon signalling.R-HSA-164378	2
250	FALSE	TRUE	TRUE	PI3K Cascade.R-HSA-109704	2
251	FALSE	TRUE	TRUE	PI-3K cascade:FGFR1.R-HSA-5654689	2
252	FALSE	TRUE	TRUE	Organic cation transport.R-HSA-549127	2
253	FALSE	TRUE	TRUE	Nucleobase biosynthesis.R-HSA-8956320	2
254	FALSE	TRUE	TRUE	Nuclear Envelope (NE) Reassembly.R-HSA-2995410	2
255	FALSE	TRUE	TRUE	Negative regulation of FGFR4 signaling.R-HSA-5654733	2
256	FALSE	TRUE	TRUE	Negative regulation of FGFR1 signaling.R-HSA-5654726	2
257	FALSE	TRUE	TRUE	Na+-Cl- dependent neurotransmitter transporters.R-HSA-442660	2
258	FALSE	TRUE	TRUE	NR1D1 (REV-ERBA) represses gene expression.R-HSA-1368071	2
259	FALSE	TRUE	TRUE	Mitotic Spindle Checkpoint.R-HSA-69618	2
260	FALSE	TRUE	TRUE	Mitotic Prometaphase.R-HSA-68877	2
261	FALSE	TRUE	TRUE	Mitotic Metaphase-Anaphase Transition.R-HSA-68881	2
262	FALSE	TRUE	TRUE	Metabolism of non-coding RNA.R-HSA-194441	2
263	FALSE	TRUE	TRUE	Metabolism of RNA.R-HSA-8953854	2
264	FALSE	TRUE	TRUE	Major pathway of rRNA processing in the nucleolus and cytosol.R-HSA-6791226	2
265	FALSE	TRUE	TRUE	MET receptor recycling.R-HSA-8875656	2
266	FALSE	TRUE	TRUE	MET activates RAP1 and RAC1.R-HSA-8875555	2
267	FALSE	TRUE	TRUE	MET Receptor Activation.R-HSA-6806942	2
268	FALSE	TRUE	TRUE	MASTL Facilitates Mitotic Progression.R-HSA-2465910	2
269	FALSE	TRUE	TRUE	Late Phase of HIV Life Cycle.R-HSA-162599	2
270	TRUE	FALSE	TRUE	ARL13B-mediated ciliary trafficking of INPP5E.R-HSA-5624958	2
271	FALSE	TRUE	TRUE	KSRP (KHSRP) binds and destabilizes mRNA.R-HSA-450604	2
272	FALSE	TRUE	TRUE	Intestinal hexose absorption.R-HSA-8981373	2
273	FALSE	TRUE	TRUE	FGFR1c ligand binding and activation.R-HSA-190373	2
274	TRUE	FALSE	TRUE	Tristetraprolin (TTP, ZFP36) binds and destabilizes mRNA.R-HSA-450513	2
275	TRUE	FALSE	TRUE	HDL assembly.R-HSA-8963896	2
276	TRUE	FALSE	TRUE	Chaperone Mediated Autophagy.R-HSA-9613829	2
277	TRUE	TRUE	FALSE	PIWI-interacting RNA (piRNA) biogenesis.R-HSA-5601884	2
278	TRUE	FALSE	TRUE	PLCG1 events in ERBB2 signaling.R-HSA-1251932	2
279	TRUE	TRUE	FALSE	POU5F1 (OCT4), SOX2, NANOG activate genes related to proliferation.R-HSA-2892247	2
280	TRUE	TRUE	FALSE	M Phase.R-HSA-68886	2
281	TRUE	TRUE	FALSE	POU5F1 (OCT4), SOX2, NANOG repress genes related to differentiation.R-HSA-2892245	2
282	TRUE	TRUE	FALSE	PTK6 Down-Regulation.R-HSA-8849472	2
283	TRUE	FALSE	TRUE	PTK6 Expression.R-HSA-8849473	2
284	TRUE	FALSE	TRUE	PTK6 Regulates Cell Cycle.R-HSA-8849470	2
285	TRUE	TRUE	FALSE	PTK6 Regulates Proteins Involved in RNA Processing.R-HSA-8849468	2
286	TRUE	FALSE	TRUE	Late endosomal microautophagy.R-HSA-9615710	2
287	TRUE	FALSE	TRUE	Constitutive Signaling by NOTCH1 PEST Domain Mutants.R-HSA-2644606	2
288	TRUE	FALSE	TRUE	Constitutive Signaling by NOTCH1 HD+PEST Domain Mutants.R-HSA-2894862	2
289	TRUE	FALSE	TRUE	Laminin interactions.R-HSA-3000157	2
290	TRUE	FALSE	TRUE	PTK6 promotes HIF1A stabilization.R-HSA-8857538	2
291	TRUE	TRUE	FALSE	Peptide hormone metabolism.R-HSA-2980736	2
292	TRUE	FALSE	TRUE	Phospholipase C-mediated cascade
293	TRUE	TRUE	FALSE	Phospholipase C-mediated cascade
294	TRUE	TRUE	FALSE	Formation of apoptosome.R-HSA-111458	2
295	TRUE	FALSE	TRUE	Plasma lipoprotein remodeling.R-HSA-8963899	2
296	TRUE	FALSE	TRUE	Estrogen-dependent nuclear events downstream of ESR-membrane signaling.R-HSA-9634638	2
297	TRUE	FALSE	TRUE	Pre-NOTCH Processing in Golgi.R-HSA-1912420	2
298	TRUE	FALSE	TRUE	Pre-NOTCH Processing in the Endoplasmic Reticulum.R-HSA-1912399	2
299	TRUE	FALSE	TRUE	Interleukin-37 signaling.R-HSA-9008059	2
300	TRUE	TRUE	FALSE	Protein-protein interactions at synapses.R-HSA-6794362	2
301	TRUE	FALSE	TRUE	Integrin cell surface interactions.R-HSA-216083	2
302	TRUE	FALSE	TRUE	Insulin receptor signalling cascade.R-HSA-74751	2
303	TRUE	FALSE	TRUE	Proton-coupled neutral amino acid transporters.R-HSA-428559	2
304	TRUE	FALSE	TRUE	PI-3K cascade:FGFR2.R-HSA-5654695	2
305	TRUE	FALSE	TRUE	PERK regulates gene expression.R-HSA-381042	2
306	TRUE	FALSE	TRUE	Oligomerization of connexins into connexons.R-HSA-190704	2
307	TRUE	TRUE	FALSE	Disinhibition of SNARE formation.R-HSA-114516	2
308	TRUE	FALSE	TRUE	NOTCH1 Intracellular Domain Regulates Transcription.R-HSA-2122947	2
309	TRUE	TRUE	FALSE	NOTCH2 intracellular domain regulates transcription.R-HSA-2197563	2
310	TRUE	FALSE	TRUE	Molecules associated with elastic fibres.R-HSA-2129379	2
311	TRUE	FALSE	TRUE	Microtubule-dependent trafficking of connexons from Golgi to the plasma membrane.R-HSA-190840	2
312	TRUE	TRUE	FALSE	Entry of Influenza Virion into Host Cell via Endocytosis.R-HSA-168275	2
313	TRUE	FALSE	TRUE	Elastic fibre formation.R-HSA-1566948	2
314	TRUE	FALSE	TRUE	Metabolism of vitamins and cofactors.R-HSA-196854	2
315	TRUE	FALSE	TRUE	EPHA-mediated growth cone collapse.R-HSA-3928663	2
316	TRUE	TRUE	FALSE	EGFR downregulation.R-HSA-182971	2
317	TRUE	FALSE	TRUE	EGFR Transactivation by Gastrin.R-HSA-2179392	2
318	TRUE	FALSE	TRUE	ECM proteoglycans.R-HSA-3000178	2
319	TRUE	FALSE	TRUE	Downstream signaling of activated FGFR2.R-HSA-5654696	2
320	TRUE	FALSE	TRUE	Digestion.R-HSA-8935690	2
321	TRUE	FALSE	TRUE	Fibronectin matrix formation.R-HSA-1566977	2
322	TRUE	FALSE	TRUE	Digestion and absorption.R-HSA-8963743	2
323	TRUE	TRUE	FALSE	Neurexins and neuroligins.R-HSA-6794361	2
324	TRUE	FALSE	TRUE	Dermatan sulfate biosynthesis.R-HSA-2022923	2
325	TRUE	FALSE	TRUE	Depolymerisation of the Nuclear Lamina.R-HSA-4419969	2
326	TRUE	FALSE	TRUE	Fc epsilon receptor (FCERI) signaling.R-HSA-2454202	2
327	TRUE	FALSE	TRUE	Non-integrin membrane-ECM interactions.R-HSA-3000171	2
328	TRUE	FALSE	TRUE	Noncanonical activation of NOTCH3.R-HSA-9017802	2
329	TRUE	TRUE	FALSE	Macroautophagy.R-HSA-1632852	2
330	TRUE	FALSE	TRUE	MET interacts with TNS proteins.R-HSA-8875513	2
331	TRUE	FALSE	TRUE	Notch-HLH transcription pathway.R-HSA-350054	2
332	TRUE	TRUE	FALSE	Cytochrome c-mediated apoptotic response.R-HSA-111461	2
333	TRUE	FALSE	TRUE	Cross-presentation of particulate exogenous antigens (phagosomes).R-HSA-1236973	2
334	TRUE	FALSE	TRUE	Chondroitin sulfate biosynthesis.R-HSA-2022870	2
335	TRUE	FALSE	TRUE	NOD1-2 Signaling Pathway.R-HSA-168638	2
336	TRUE	TRUE	FALSE	Gene expression (Transcription).R-HSA-74160	2
337	TRUE	TRUE	FALSE	HCN channels.R-HSA-1296061	2
338	TRUE	TRUE	FALSE	RNA Polymerase I Promoter Clearance.R-HSA-73854	2
339	TRUE	FALSE	TRUE	Butyrate Response Factor 1 (BRF1) binds and destabilizes mRNA.R-HSA-450385	2
340	TRUE	TRUE	FALSE	Regulation of the apoptosome activity.R-HSA-9627069	2
341	TRUE	TRUE	FALSE	Activated NTRK2 signals through PLCG1.R-HSA-9026527	2
342	TRUE	FALSE	TRUE	Binding and Uptake of Ligands by Scavenger Receptors.R-HSA-2173782	2
343	TRUE	TRUE	FALSE	RNA Polymerase I Transcription Termination.R-HSA-73863	2
344	TRUE	TRUE	FALSE	B-WICH complex positively regulates rRNA expression.R-HSA-5250924	2
345	TRUE	FALSE	TRUE	Generation of second messenger molecules.R-HSA-202433	2
346	TRUE	TRUE	FALSE	Glyoxylate metabolism and glycine degradation.R-HSA-389661	2
347	TRUE	TRUE	FALSE	Regulation of signaling by NODAL.R-HSA-1433617	2
348	TRUE	FALSE	TRUE	Inactivation of CDC42 and RAC1.R-HSA-428543	2
349	TRUE	FALSE	TRUE	IRF3 mediated activation of type 1 IFN.R-HSA-1606341	2
350	TRUE	TRUE	FALSE	IRAK2 mediated activation of TAK1 complex.R-HSA-937042	2
351	TRUE	TRUE	FALSE	IRAK2 mediated activation of TAK1 complex upon TLR7-8 or 9 stimulation.R-HSA-975163	2
352	TRUE	FALSE	TRUE	CLEC7A (Dectin-1) induces NFAT activation.R-HSA-5607763	2
353	TRUE	FALSE	TRUE	RUNX3 regulates YAP1-mediated transcription.R-HSA-8951671	2
354	TRUE	FALSE	TRUE	Regulation of mRNA stability by proteins that bind AU-rich elements.R-HSA-450531	2
355	TRUE	FALSE	TRUE	Regulation of lipid metabolism by PPARalpha.R-HSA-400206	2
356	TRUE	FALSE	TRUE	Regulation of gap junction activity.R-HSA-191650	2
357	TRUE	FALSE	TRUE	Growth hormone receptor signaling.R-HSA-982772	2
358	TRUE	FALSE	TRUE	Alpha-protein kinase 1 signaling pathway.R-HSA-9645460	2
359	TRUE	FALSE	TRUE	HCMV Late Events.R-HSA-9610379	2
360	TRUE	FALSE	TRUE	Hh mutants abrogate ligand secretion.R-HSA-5387390	2
361	TRUE	FALSE	TRUE	Hh mutants that don't undergo autocatalytic processing are degraded by ERAD.R-HSA-5362768	2
362	TRUE	TRUE	FALSE	Reelin signalling pathway.R-HSA-8866376	2
363	TRUE	FALSE	TRUE	Regulation of FOXO transcriptional activity by acetylation.R-HSA-9617629	2
364	TRUE	FALSE	TRUE	Regulation of KIT signaling.R-HSA-1433559	2
365	TRUE	FALSE	TRUE	Hypusine synthesis from eIF5A-lysine.R-HSA-204626	2
366	TRUE	TRUE	FALSE	CD22 mediated BCR regulation.R-HSA-5690714	2
367	TRUE	TRUE	FALSE	Regulation of TP53 Activity through Acetylation.R-HSA-6804758	2
368	TRUE	FALSE	TRUE	RHO GTPases regulate CFTR trafficking.R-HSA-5627083	2
369	TRUE	FALSE	TRUE	Response of EIF2AK1 (HRI) to heme deficiency.R-HSA-9648895	2
370	TRUE	TRUE	FALSE	RAF activation.R-HSA-5673000	2
371	TRUE	FALSE	TRUE	HDL remodeling.R-HSA-8964058	2
372	TRUE	FALSE	TRUE	CS-DS degradation.R-HSA-2024101	2
373	TRUE	FALSE	TRUE	Gap junction trafficking and regulation.R-HSA-157858	2
374	TRUE	FALSE	TRUE	Influenza Infection.R-HSA-168255	2
375	TRUE	FALSE	TRUE	ATF6 (ATF6-alpha) activates chaperone genes.R-HSA-381183	2
376	TRUE	FALSE	TRUE	ATF4 activates genes in response to endoplasmic reticulum stress.R-HSA-380994	2
377	TRUE	FALSE	TRUE	Response of Mtb to phagocytosis.R-HSA-9637690	2
378	TRUE	FALSE	TRUE	Response of EIF2AK4 (GCN2) to amino acid deficiency.R-HSA-9633012	2
379	TRUE	TRUE	FALSE	Inhibition of PKR.R-HSA-169131	2
380	TRUE	TRUE	FALSE	InlB-mediated entry of Listeria monocytogenes into host cell.R-HSA-8875360	2
381	TRUE	FALSE	TRUE	HDR through MMEJ (alt-NHEJ).R-HSA-5685939	2
382	TRUE	TRUE	FALSE	Gene Silencing by RNA.R-HSA-211000	2
383	FALSE	FALSE	TRUE	TCF dependent signaling in response to WNT.R-HSA-201681	1
384	FALSE	FALSE	TRUE	DNA Damage Reversal.R-HSA-73942	1
385	FALSE	FALSE	TRUE	Costimulation by the CD28 family.R-HSA-388841	1
386	FALSE	FALSE	TRUE	Deactivation of the beta-catenin transactivating complex.R-HSA-3769402	1
387	FALSE	FALSE	TRUE	TNF receptor superfamily (TNFSF) members mediating non-canonical NF-kB pathway.R-HSA-5676594	1
388	FALSE	FALSE	TRUE	FGFR2c ligand binding and activation.R-HSA-190375	1
389	FALSE	FALSE	TRUE	Death Receptor Signalling.R-HSA-73887	1
390	FALSE	FALSE	TRUE	Cyclin A-B1-B2 associated events during G2-M transition.R-HSA-69273	1
391	FALSE	FALSE	TRUE	TICAM1, RIP1-mediated IKK complex recruitment.R-HSA-168927	1
392	FALSE	FALSE	TRUE	Cyclin A:Cdk2-associated events at S phase entry.R-HSA-69656	1
393	FALSE	FALSE	TRUE	Cyclin D associated events in G1.R-HSA-69231	1
394	FALSE	FALSE	TRUE	TICAM1,TRAF6-dependent induction of TAK1 complex.R-HSA-9014325	1
395	FALSE	FALSE	TRUE	DCC mediated attractive signaling.R-HSA-418885	1
396	FALSE	FALSE	TRUE	TGF-beta receptor signaling activates SMADs.R-HSA-2173789	1
397	FALSE	FALSE	TRUE	Cyclin E associated events during G1-S transition .R-HSA-69202	1
398	FALSE	FALSE	TRUE	TFAP2 (AP-2) family regulates transcription of growth factors and their receptors.R-HSA-8866910	1
399	FALSE	FALSE	TRUE	Cytochrome P450 - arranged by substrate type.R-HSA-211897	1
400	FALSE	FALSE	TRUE	TCR signaling.R-HSA-202403	1
401	FALSE	FALSE	TRUE	FGFR2 alternative splicing.R-HSA-6803529	1
402	FALSE	FALSE	TRUE	Cytosolic sensors of pathogen-associated DNA .R-HSA-1834949	1
403	FALSE	FALSE	TRUE	Synthesis of very long-chain fatty acyl-CoAs.R-HSA-75876	1
404	FALSE	FALSE	TRUE	ERBB2 Regulates Cell Motility.R-HSA-6785631	1
405	FALSE	FALSE	TRUE	Digestion of dietary lipid.R-HSA-192456	1
406	FALSE	FALSE	TRUE	Defective CFTR causes cystic fibrosis.R-HSA-5678895	1
407	FALSE	FALSE	TRUE	Erythropoietin activates RAS.R-HSA-9027284	1
408	FALSE	FALSE	TRUE	Ephrin signaling.R-HSA-3928664	1
409	FALSE	FALSE	TRUE	Downregulation of ERBB2:ERBB3 signaling.R-HSA-1358803	1
410	FALSE	FALSE	TRUE	Sphingolipid de novo biosynthesis.R-HSA-1660661	1
411	FALSE	FALSE	TRUE	Downregulation of ERBB4 signaling.R-HSA-1253288	1
412	FALSE	FALSE	TRUE	Downregulation of TGF-beta receptor signaling.R-HSA-2173788	1
413	FALSE	FALSE	TRUE	Downstream signaling of activated FGFR3.R-HSA-5654708	1
414	FALSE	FALSE	TRUE	Drug-mediated inhibition of ERBB2 signaling.R-HSA-9652282	1
415	FALSE	FALSE	TRUE	EPH-Ephrin signaling.R-HSA-2682334	1
416	FALSE	FALSE	TRUE	EPH-ephrin mediated repulsion of cells.R-HSA-3928665	1
417	FALSE	FALSE	TRUE	EPHB-mediated forward signaling.R-HSA-3928662	1
418	FALSE	FALSE	TRUE	Striated Muscle Contraction.R-HSA-390522	1
419	FALSE	FALSE	TRUE	ER Quality Control Compartment (ERQC).R-HSA-901032	1
420	FALSE	FALSE	TRUE	Stimulation of the cell death response by PAK-2p34.R-HSA-211736	1
421	FALSE	FALSE	TRUE	Sphingolipid metabolism.R-HSA-428157	1
422	FALSE	FALSE	TRUE	Stabilization of p53.R-HSA-69541	1
423	FALSE	FALSE	TRUE	Downregulation of ERBB2 signaling.R-HSA-8863795	1
424	FALSE	FALSE	TRUE	Disorders of transmembrane transporters.R-HSA-5619115	1
425	FALSE	FALSE	TRUE	Degradation of DVL.R-HSA-4641258	1
426	FALSE	FALSE	TRUE	Sulfur amino acid metabolism.R-HSA-1614635	1
427	FALSE	FALSE	TRUE	FGFR1 mutant receptor activation.R-HSA-1839124	1
428	FALSE	FALSE	TRUE	FCGR3A-mediated IL10 synthesis.R-HSA-9664323	1
429	FALSE	FALSE	TRUE	Degradation of GLI1 by the proteasome.R-HSA-5610780	1
430	FALSE	FALSE	TRUE	Synthesis of substrates in N-glycan biosythesis.R-HSA-446219	1
431	FALSE	FALSE	TRUE	Degradation of GLI2 by the proteasome.R-HSA-5610783	1
432	FALSE	FALSE	TRUE	Endogenous sterols.R-HSA-211976	1
433	FALSE	FALSE	TRUE	Dimerization of procaspase-8.R-HSA-69416	1
434	FALSE	FALSE	TRUE	Eukaryotic Translation Termination.R-HSA-72764	1
435	FALSE	FALSE	TRUE	Synthesis of bile acids and bile salts via 27-hydroxycholesterol.R-HSA-193807	1
436	FALSE	FALSE	TRUE	Disassembly of the destruction complex and recruitment of AXIN to the membrane.R-HSA-4641262	1
437	FALSE	FALSE	TRUE	Synthesis And Processing Of GAG, GAGPOL Polyproteins.R-HSA-174495	1
438	FALSE	FALSE	TRUE	Eukaryotic Translation Elongation.R-HSA-156842	1
439	FALSE	FALSE	TRUE	Erythropoietin activates STAT5.R-HSA-9027283	1
440	FALSE	FALSE	TRUE	Disease.R-HSA-1643685	1
441	FALSE	FALSE	TRUE	Synaptic adhesion-like molecules.R-HSA-8849932	1
442	FALSE	FALSE	TRUE	Dissolution of Fibrin Clot.R-HSA-75205	1
443	FALSE	FALSE	TRUE	Regulation of TP53 Activity.R-HSA-5633007	1
444	FALSE	FALSE	TRUE	Constitutive Signaling by Overexpressed ERBB2.R-HSA-9634285	1
445	FALSE	FALSE	TRUE	ATF6 (ATF6-alpha) activates chaperones.R-HSA-381033	1
446	FALSE	FALSE	TRUE	VEGFA-VEGFR2 Pathway.R-HSA-4420097	1
447	FALSE	FALSE	TRUE	Uptake and function of anthrax toxins.R-HSA-5210891	1
448	FALSE	TRUE	FALSE	rRNA modification in the nucleus and cytosol.R-HSA-6790901	1
449	FALSE	FALSE	TRUE	A tetrasaccharide linker sequence is required for GAG synthesis.R-HSA-1971475	1
450	FALSE	FALSE	TRUE	ABC transporter disorders.R-HSA-5619084	1
451	FALSE	FALSE	TRUE	Ubiquitin-dependent degradation of Cyclin D.R-HSA-75815	1
452	FALSE	FALSE	TRUE	Transport of bile salts and organic acids, metal ions and amine compounds.R-HSA-425366	1
453	FALSE	FALSE	TRUE	ADORA2B mediated anti-inflammatory cytokines production.R-HSA-9660821	1
454	FALSE	FALSE	TRUE	ALKBH3 mediated reversal of alkylation damage.R-HSA-112126	1
455	FALSE	FALSE	TRUE	AUF1 (hnRNP D0) binds and destabilizes mRNA.R-HSA-450408	1
456	FALSE	FALSE	TRUE	VEGFR2 mediated cell proliferation.R-HSA-5218921	1
457	FALSE	FALSE	TRUE	AURKA Activation by TPX2.R-HSA-8854518	1
458	FALSE	FALSE	TRUE	Activated NTRK2 signals through RAS.R-HSA-9026519	1
459	FALSE	FALSE	TRUE	Activated NTRK3 signals through RAS.R-HSA-9034864	1
460	FALSE	FALSE	TRUE	Activation and oligomerization of BAK protein.R-HSA-111452	1
461	FALSE	FALSE	TRUE	Activation of Ca-permeable Kainate Receptor.R-HSA-451308	1
462	FALSE	FALSE	TRUE	Activation of NF-kappaB in B cells.R-HSA-1169091	1
463	FALSE	FALSE	TRUE	Translation.R-HSA-72766	1
464	FALSE	FALSE	TRUE	Activation of NIMA Kinases NEK9, NEK6, NEK7.R-HSA-2980767	1
465	FALSE	FALSE	TRUE	Activation of PPARGC1A (PGC-1alpha) by phosphorylation.R-HSA-2151209	1
466	FALSE	TRUE	FALSE	AKT-mediated inactivation of FOXO1A.R-HSA-211163	1
467	FALSE	FALSE	TRUE	VEGFR2 mediated vascular permeability.R-HSA-5218920	1
468	FALSE	FALSE	TRUE	Anchoring fibril formation.R-HSA-2214320	1
469	FALSE	FALSE	TRUE	ZBP1(DAI) mediated induction of type I IFNs.R-HSA-1606322	1
470	FALSE	TRUE	FALSE	VLDLR internalisation and degradation.R-HSA-8866427	1
471	FALSE	TRUE	FALSE	Vitamin B1 (thiamin) metabolism.R-HSA-196819	1
472	FALSE	TRUE	FALSE	Vitamin C (ascorbate) metabolism.R-HSA-196836	1
473	FALSE	FALSE	TRUE	mRNA Splicing - Minor Pathway.R-HSA-72165	1
474	FALSE	FALSE	TRUE	eNOS activation.R-HSA-203615	1
475	FALSE	TRUE	FALSE	XAV939 inhibits tankyrase, stabilizing AXIN.R-HSA-5545619	1
476	FALSE	TRUE	FALSE	activated TAK1 mediates p38 MAPK activation.R-HSA-450302	1
477	FALSE	TRUE	FALSE	alpha-linolenic (omega3) and linoleic (omega6) acid metabolism.R-HSA-2046104	1
478	FALSE	FALSE	TRUE	cGMP effects.R-HSA-418457	1
479	FALSE	FALSE	TRUE	YAP1- and WWTR1 (TAZ)-stimulated gene expression.R-HSA-2032785	1
480	FALSE	FALSE	TRUE	Vesicle-mediated transport.R-HSA-5653656	1
481	FALSE	FALSE	TRUE	Wax biosynthesis.R-HSA-9640463	1
482	FALSE	FALSE	TRUE	Wax and plasmalogen biosynthesis.R-HSA-8848584	1
483	FALSE	TRUE	FALSE	alpha-linolenic acid (ALA) metabolism.R-HSA-2046106	1
484	FALSE	TRUE	FALSE	betaKlotho-mediated ligand binding.R-HSA-1307965	1
485	FALSE	FALSE	TRUE	Vpu mediated degradation of CD4.R-HSA-180534	1
486	FALSE	TRUE	FALSE	mTORC1-mediated signalling.R-HSA-166208	1
487	FALSE	FALSE	TRUE	Viral mRNA Translation.R-HSA-192823	1
488	FALSE	TRUE	FALSE	rRNA processing in the mitochondrion.R-HSA-8868766	1
489	FALSE	TRUE	FALSE	tRNA processing in the mitochondrion.R-HSA-6785470	1
490	FALSE	FALSE	TRUE	Transcriptional regulation of white adipocyte differentiation.R-HSA-381340	1
491	FALSE	FALSE	TRUE	Anchoring of the basal body to the plasma membrane.R-HSA-5620912	1
492	FALSE	FALSE	TRUE	Constitutive Signaling by Ligand-Responsive EGFR Cancer Variants.R-HSA-1236382	1
493	FALSE	FALSE	TRUE	Cellular response to heat stress.R-HSA-3371556	1
494	FALSE	FALSE	TRUE	CDC6 association with the ORC:origin complex.R-HSA-68689	1
495	FALSE	FALSE	TRUE	CDT1 association with the CDC6:ORC:origin complex.R-HSA-68827	1
496	FALSE	FALSE	TRUE	FGFR3 ligand binding and activation.R-HSA-190239	1
497	FALSE	FALSE	TRUE	TP53 Regulates Transcription of Death Receptors and Ligands.R-HSA-6803211	1
498	FALSE	FALSE	TRUE	TP53 Regulates Transcription of Cell Cycle Genes.R-HSA-6791312	1
499	FALSE	FALSE	TRUE	TP53 Regulates Metabolic Genes.R-HSA-5628897	1
500	FALSE	FALSE	TRUE	CTLA4 inhibitory signaling.R-HSA-389513	1
501	FALSE	FALSE	TRUE	Ca2+ pathway.R-HSA-4086398	1
502	FALSE	FALSE	TRUE	TNFR2 non-canonical NF-kB pathway.R-HSA-5668541	1
503	FALSE	FALSE	TRUE	Cellular responses to external stimuli.R-HSA-8953897	1
504	FALSE	FALSE	TRUE	TP53 regulates transcription of several additional cell death genes whose specific roles in p53-dependent apoptosis remain uncertain.R-HSA-6803205	1
505	FALSE	FALSE	TRUE	Cellular responses to stress.R-HSA-2262752	1
506	FALSE	FALSE	TRUE	Centrosome maturation.R-HSA-380287	1
507	FALSE	FALSE	TRUE	Chondroitin sulfate-dermatan sulfate metabolism.R-HSA-1793185	1
508	FALSE	FALSE	TRUE	TNFR1-induced NFkappaB signaling pathway.R-HSA-5357956	1
509	FALSE	FALSE	TRUE	Chylomicron remodeling.R-HSA-8963901	1
510	FALSE	FALSE	TRUE	Cilium Assembly.R-HSA-5617833	1
511	FALSE	FALSE	TRUE	TNF signaling.R-HSA-75893	1
512	FALSE	FALSE	TRUE	Condensation of Prometaphase Chromosomes.R-HSA-2514853	1
513	FALSE	FALSE	TRUE	Constitutive Signaling by EGFRvIII.R-HSA-5637810	1
514	FALSE	FALSE	TRUE	CD28 dependent Vav1 pathway.R-HSA-389359	1
515	FALSE	FALSE	TRUE	TRAIL signaling.R-HSA-75158	1
516	FALSE	FALSE	TRUE	Transcriptional activation of mitochondrial biogenesis.R-HSA-2151201	1
517	FALSE	FALSE	TRUE	Attenuation phase.R-HSA-3371568	1
518	FALSE	FALSE	TRUE	Transcriptional Regulation by VENTX.R-HSA-8853884	1
519	FALSE	FALSE	TRUE	Transcription of E2F targets under negative control by p107 (RBL1) and p130 (RBL2) in complex with HDAC1.R-HSA-1362300	1
520	FALSE	FALSE	TRUE	Antagonism of Activin by Follistatin.R-HSA-2473224	1
521	FALSE	FALSE	TRUE	Transcription from mitochondrial promoters.R-HSA-75944	1
522	FALSE	FALSE	TRUE	Tight junction interactions.R-HSA-420029	1
523	FALSE	FALSE	TRUE	Anti-inflammatory response favouring Leishmania parasite infection.R-HSA-9662851	1
524	FALSE	FALSE	TRUE	Apoptotic cleavage of cellular proteins.R-HSA-111465	1
525	FALSE	FALSE	TRUE	Attachment of GPI anchor to uPAR.R-HSA-162791	1
526	FALSE	FALSE	TRUE	The retinoid cycle in cones (daylight vision).R-HSA-2187335	1
527	FALSE	FALSE	TRUE	Axon guidance.R-HSA-422475	1
528	FALSE	FALSE	TRUE	CASP8 activity is inhibited.R-HSA-5218900	1
529	FALSE	FALSE	TRUE	BBSome-mediated cargo-targeting to cilium.R-HSA-5620922	1
530	FALSE	FALSE	TRUE	Tetrahydrobiopterin (BH4) synthesis, recycling, salvage and regulation.R-HSA-1474151	1
531	FALSE	FALSE	TRUE	BMAL1:CLOCK,NPAS2 activates circadian gene expression.R-HSA-1368108	1
532	FALSE	FALSE	TRUE	Basigin interactions.R-HSA-210991	1
533	FALSE	FALSE	TRUE	Bile acid and bile salt metabolism.R-HSA-194068	1
534	FALSE	FALSE	TRUE	Binding of TCF-LEF:CTNNB1 to target gene promoters.R-HSA-4411364	1
535	FALSE	FALSE	TRUE	Blood group systems biosynthesis.R-HSA-9033658	1
536	FALSE	FALSE	TRUE	Branched-chain amino acid catabolism.R-HSA-70895	1
537	FALSE	FALSE	TRUE	TYSND1 cleaves peroxisomal proteins.R-HSA-9033500	1
538	FALSE	FALSE	TRUE	TP53 regulates transcription of additional cell cycle genes whose exact role in the p53 pathway remain uncertain.R-HSA-6804115	1
539	FALSE	FALSE	TRUE	Signaling by VEGF.R-HSA-194138	1
540	FALSE	FALSE	TRUE	FGFR3 mutant receptor activation.R-HSA-2033514	1
541	FALSE	FALSE	TRUE	SRP-dependent cotranslational protein targeting to membrane.R-HSA-1799339	1
542	FALSE	FALSE	TRUE	Nuclear Receptor transcription pathway.R-HSA-383280	1
543	FALSE	FALSE	TRUE	Nucleotide-binding domain, leucine rich repeat containing receptor (NLR) signaling pathways.R-HSA-168643	1
544	FALSE	FALSE	TRUE	Organelle biogenesis and maintenance.R-HSA-1852241	1
545	FALSE	FALSE	TRUE	PCNA-Dependent Long Patch Base Excision Repair.R-HSA-5651801	1
546	FALSE	FALSE	TRUE	SMAD2-SMAD3:SMAD4 heterotrimer regulates transcription.R-HSA-2173796	1
547	FALSE	FALSE	TRUE	SLC-mediated transmembrane transport.R-HSA-425407	1
548	FALSE	FALSE	TRUE	SHC1 events in ERBB2 signaling.R-HSA-1250196	1
549	FALSE	FALSE	TRUE	SHC-related events triggered by IGF1R.R-HSA-2428933	1
550	FALSE	FALSE	TRUE	SHC-mediated cascade:FGFR3.R-HSA-5654704	1
551	FALSE	FALSE	TRUE	SCF(Skp2)-mediated degradation of p27-p21.R-HSA-187577	1
552	FALSE	FALSE	TRUE	Role of LAT2-NTAL-LAB on calcium mobilization.R-HSA-2730905	1
553	FALSE	FALSE	TRUE	PD-1 signaling.R-HSA-389948	1
554	FALSE	FALSE	TRUE	PI-3K cascade:FGFR3.R-HSA-5654710	1
555	FALSE	FALSE	TRUE	PLC beta mediated events.R-HSA-112043	1
556	FALSE	FALSE	TRUE	POLB-Dependent Long Patch Base Excision Repair.R-HSA-110362	1
557	FALSE	FALSE	TRUE	PPARA activates gene expression.R-HSA-1989781	1
558	FALSE	FALSE	TRUE	Peptide chain elongation.R-HSA-156902	1
559	FALSE	FALSE	TRUE	Pexophagy.R-HSA-9664873	1
560	FALSE	FALSE	TRUE	Phase I - Functionalization of compounds.R-HSA-211945	1
561	FALSE	FALSE	TRUE	Phospholipase C-mediated cascade
562	FALSE	FALSE	TRUE	Phosphorylation of Emi1.R-HSA-176417	1
563	FALSE	FALSE	TRUE	Nonsense-Mediated Decay (NMD).R-HSA-927802	1
564	FALSE	FALSE	TRUE	Nonsense Mediated Decay (NMD) independent of the Exon Junction Complex (EJC).R-HSA-975956	1
565	FALSE	FALSE	TRUE	Signalling to RAS.R-HSA-167044	1
566	FALSE	FALSE	TRUE	Nonsense Mediated Decay (NMD) enhanced by the Exon Junction Complex (EJC).R-HSA-975957	1
567	FALSE	FALSE	TRUE	Mitotic G2-G2-M phases.R-HSA-453274	1
568	FALSE	FALSE	TRUE	Selective autophagy.R-HSA-9663891	1
569	FALSE	FALSE	TRUE	Modulation by Mtb of host immune system.R-HSA-9637628	1
570	FALSE	FALSE	TRUE	Myogenesis.R-HSA-525793	1
571	FALSE	FALSE	TRUE	N-glycan trimming in the ER and Calnexin-Calreticulin cycle.R-HSA-532668	1
572	FALSE	FALSE	TRUE	NCAM signaling for neurite out-growth.R-HSA-375165	1
573	FALSE	FALSE	TRUE	NCAM1 interactions.R-HSA-419037	1
574	FALSE	FALSE	TRUE	NOSTRIN mediated eNOS trafficking.R-HSA-203641	1
575	FALSE	FALSE	TRUE	NRIF signals cell death from the nucleus.R-HSA-205043	1
576	FALSE	FALSE	TRUE	Negative regulation of NMDA receptor-mediated neuronal transmission.R-HSA-9617324	1
577	FALSE	FALSE	TRUE	Scavenging by Class F Receptors.R-HSA-3000484	1
578	FALSE	FALSE	TRUE	Negative regulation of NOTCH4 signaling.R-HSA-9604323	1
579	FALSE	FALSE	TRUE	SUMOylation of chromatin organization proteins.R-HSA-4551638	1
580	FALSE	FALSE	TRUE	Negative regulation of TCF-dependent signaling by WNT ligand antagonists.R-HSA-3772470	1
581	FALSE	FALSE	TRUE	SUMOylation of DNA damage response and repair proteins.R-HSA-3108214	1
582	FALSE	FALSE	TRUE	Nervous system development.R-HSA-9675108	1
583	FALSE	FALSE	TRUE	SUMO is proteolytically processed.R-HSA-3065679	1
584	FALSE	FALSE	TRUE	Netrin-1 signaling.R-HSA-373752	1
585	FALSE	FALSE	TRUE	SUMO E3 ligases SUMOylate target proteins.R-HSA-3108232	1
586	FALSE	FALSE	TRUE	STING mediated induction of host immune responses.R-HSA-1834941	1
587	FALSE	FALSE	TRUE	Neurophilin interactions with VEGF and VEGFR.R-HSA-194306	1
588	FALSE	FALSE	TRUE	Phosphorylation of proteins involved in G1-S transition by active Cyclin E:Cdk2 complexes.R-HSA-69200	1
589	FALSE	FALSE	TRUE	Plasma lipoprotein assembly.R-HSA-8963898	1
590	FALSE	FALSE	TRUE	Plasmalogen biosynthesis.R-HSA-75896	1
591	FALSE	FALSE	TRUE	Platelet sensitization by LDL.R-HSA-432142	1
592	FALSE	FALSE	TRUE	Regulation of ornithine decarboxylase (ODC).R-HSA-350562	1
593	FALSE	FALSE	TRUE	Receptor-type tyrosine-protein phosphatases.R-HSA-388844	1
594	FALSE	FALSE	TRUE	Regulation of necroptotic cell death.R-HSA-5675482	1
595	FALSE	FALSE	TRUE	Recognition of DNA damage by PCNA-containing replication complex.R-HSA-110314	1
596	FALSE	FALSE	TRUE	Regulation of innate immune responses to cytosolic DNA.R-HSA-3134975	1
597	FALSE	FALSE	TRUE	Recruitment of NuMA to mitotic centrosomes.R-HSA-380320	1
598	FALSE	FALSE	TRUE	Recruitment of mitotic centrosome proteins and complexes.R-HSA-380270	1
599	FALSE	FALSE	TRUE	Regulation of expression of SLITs and ROBOs.R-HSA-9010553	1
600	FALSE	FALSE	TRUE	Recycling of bile acids and salts.R-HSA-159418	1
601	FALSE	FALSE	TRUE	Regulation by c-FLIP.R-HSA-3371378	1
602	FALSE	FALSE	TRUE	Regulation of Apoptosis.R-HSA-169911	1
603	FALSE	FALSE	TRUE	Regulation of FZD by ubiquitination.R-HSA-4641263	1
604	FALSE	FALSE	TRUE	Regulation of HSF1-mediated heat shock response.R-HSA-3371453	1
605	FALSE	FALSE	TRUE	Regulation of commissural axon pathfinding by SLIT and ROBO.R-HSA-428542	1
606	FALSE	FALSE	TRUE	Regulation of Insulin-like Growth Factor (IGF) transport and uptake by Insulin-like Growth Factor Binding Proteins (IGFBPs).R-HSA-381426	1
607	FALSE	FALSE	TRUE	Regulation of PAK-2p34 activity by PS-GAP-RHG10.R-HSA-211728	1
608	FALSE	FALSE	TRUE	Regulation of PLK1 Activity at G2-M Transition.R-HSA-2565942	1
609	FALSE	FALSE	TRUE	Regulation of activated PAK-2p34 by proteasome mediated degradation.R-HSA-211733	1
610	FALSE	FALSE	TRUE	Regulation of PTEN gene transcription.R-HSA-8943724	1
611	FALSE	FALSE	TRUE	Regulation of RAS by GAPs.R-HSA-5658442	1
612	FALSE	FALSE	TRUE	Regulation of TNFR1 signaling.R-HSA-5357905	1
613	FALSE	FALSE	TRUE	Regulation of signaling by CBL.R-HSA-912631	1
614	FALSE	FALSE	TRUE	RUNX3 regulates p14-ARF.R-HSA-8951936	1
615	FALSE	FALSE	TRUE	RUNX3 regulates WNT signaling.R-HSA-8951430	1
616	FALSE	FALSE	TRUE	RNA Polymerase II Transcription Termination.R-HSA-73856	1
617	FALSE	FALSE	TRUE	Post-translational modification: synthesis of GPI-anchored proteins.R-HSA-163125	1
618	FALSE	FALSE	TRUE	Prevention of phagosomal-lysosomal fusion.R-HSA-9636383	1
619	FALSE	FALSE	TRUE	Processing of Intronless Pre-mRNAs.R-HSA-77595	1
620	FALSE	FALSE	TRUE	RAB geranylgeranylation.R-HSA-8873719	1
621	FALSE	FALSE	TRUE	RET signaling.R-HSA-8853659	1
622	FALSE	FALSE	TRUE	RHO GTPases activate KTN1.R-HSA-5625970	1
623	FALSE	FALSE	TRUE	RNA Pol II CTD phosphorylation and interaction with CE during HIV infection.R-HSA-167160	1
624	FALSE	FALSE	TRUE	RNA Pol II CTD phosphorylation and interaction with CE.R-HSA-77075	1
625	FALSE	FALSE	TRUE	RNA Polymerase II Pre-transcription Events.R-HSA-674695	1
626	FALSE	FALSE	TRUE	Rhesus blood group biosynthesis.R-HSA-9037628	1
627	FALSE	FALSE	TRUE	Repression of WNT target genes.R-HSA-4641265	1
628	FALSE	FALSE	TRUE	Reversal of alkylation damage by DNA dioxygenases.R-HSA-73943	1
629	FALSE	FALSE	TRUE	Resolution of AP sites via the multiple-nucleotide patch replacement pathway.R-HSA-110373	1
630	FALSE	FALSE	TRUE	RNA polymerase II transcribes snRNA genes.R-HSA-6807505	1
631	FALSE	FALSE	TRUE	RUNX1 and FOXP3 control the development of regulatory T lymphocytes (Tregs).R-HSA-8877330	1
632	FALSE	FALSE	TRUE	RUNX1 regulates expression of components of tight junctions.R-HSA-8935964	1
633	FALSE	FALSE	TRUE	RUNX1 regulates transcription of genes involved in BCR signaling.R-HSA-8939245	1
634	FALSE	FALSE	TRUE	RUNX1 regulates transcription of genes involved in WNT signaling.R-HSA-8939256	1
635	FALSE	FALSE	TRUE	RUNX1 regulates transcription of genes involved in differentiation of keratinocytes.R-HSA-8939242	1
636	FALSE	FALSE	TRUE	RUNX1 regulates transcription of genes involved in interleukin signaling.R-HSA-8939247	1
637	FALSE	FALSE	TRUE	Selenoamino acid metabolism.R-HSA-2408522	1
638	FALSE	FALSE	TRUE	Mitotic G1 phase and G1-S transition.R-HSA-453279	1
639	FALSE	FALSE	TRUE	Selenocysteine synthesis.R-HSA-2408557	1
640	FALSE	FALSE	TRUE	Interleukin-7 signaling.R-HSA-1266695	1
641	FALSE	FALSE	TRUE	HSF1-dependent transactivation.R-HSA-3371571	1
642	FALSE	FALSE	TRUE	HSP90 chaperone cycle for steroid hormone receptors (SHR).R-HSA-3371497	1
643	FALSE	FALSE	TRUE	Signaling by PTK6.R-HSA-8848021	1
644	FALSE	FALSE	TRUE	Hedgehog 'off' state.R-HSA-5610787	1
645	FALSE	FALSE	TRUE	Signaling by Non-Receptor Tyrosine Kinases.R-HSA-9006927	1
646	FALSE	FALSE	TRUE	Signaling by MET.R-HSA-6806834	1
647	FALSE	FALSE	TRUE	Signaling by Ligand-Responsive EGFR Variants in Cancer.R-HSA-5637815	1
648	FALSE	FALSE	TRUE	Signaling by Insulin receptor.R-HSA-74752	1
649	FALSE	FALSE	TRUE	Homology Directed Repair.R-HSA-5693538	1
650	FALSE	FALSE	TRUE	Signaling by Hippo.R-HSA-2028269	1
651	FALSE	FALSE	TRUE	Hyaluronan metabolism.R-HSA-2142845	1
652	FALSE	FALSE	TRUE	Signaling by FGFR3.R-HSA-5654741	1
653	FALSE	FALSE	TRUE	Signaling by FGFR3 point mutants in cancer.R-HSA-8853338	1
654	FALSE	FALSE	TRUE	Hyaluronan uptake and degradation.R-HSA-2160916	1
655	FALSE	FALSE	TRUE	Signaling by FGFR3 in disease.R-HSA-5655332	1
656	FALSE	FALSE	TRUE	Signaling by FGFR3 fusions in cancer.R-HSA-8853334	1
657	FALSE	FALSE	TRUE	IGF1R signaling cascade.R-HSA-2428924	1
658	FALSE	FALSE	TRUE	IRF3-mediated induction of type I IFN.R-HSA-3270619	1
659	FALSE	FALSE	TRUE	Signaling by FGFR2 IIIa TM.R-HSA-8851708	1
660	FALSE	FALSE	TRUE	Signaling by FGFR1 in disease.R-HSA-5655302	1
661	FALSE	FALSE	TRUE	Influenza Viral RNA Transcription and Replication.R-HSA-168273	1
662	FALSE	FALSE	TRUE	Signaling by TGF-beta Receptor Complex.R-HSA-170834	1
663	FALSE	FALSE	TRUE	HSF1 activation.R-HSA-3371511	1
664	FALSE	FALSE	TRUE	HDR through Single Strand Annealing (SSA).R-HSA-5685938	1
665	FALSE	FALSE	TRUE	G1 Phase.R-HSA-69236	1
666	FALSE	FALSE	TRUE	FGFR3c ligand binding and activation.R-HSA-190372	1
667	FALSE	FALSE	TRUE	Signaling by plasma membrane FGFR1 fusions.R-HSA-8853336	1
668	FALSE	FALSE	TRUE	Factors involved in megakaryocyte development and platelet production.R-HSA-983231	1
669	FALSE	FALSE	TRUE	Fanconi Anemia Pathway.R-HSA-6783310	1
670	FALSE	FALSE	TRUE	Fatty acyl-CoA biosynthesis.R-HSA-75105	1
671	FALSE	FALSE	TRUE	Signaling by cytosolic FGFR1 fusion mutants.R-HSA-1839117	1
672	FALSE	FALSE	TRUE	Formation of a pool of free 40S subunits.R-HSA-72689	1
673	FALSE	FALSE	TRUE	G-protein mediated events.R-HSA-112040	1
674	FALSE	FALSE	TRUE	G0 and Early G1.R-HSA-1538133	1
675	FALSE	FALSE	TRUE	G2 Phase.R-HSA-68911	1
676	FALSE	FALSE	TRUE	HDR through Homologous Recombination (HRR) or Single Strand Annealing (SSA).R-HSA-5693567	1
677	FALSE	FALSE	TRUE	G2-M DNA replication checkpoint.R-HSA-69478	1
678	FALSE	FALSE	TRUE	G2-M Transition.R-HSA-69275	1
679	FALSE	FALSE	TRUE	Signaling by activated point mutants of FGFR3.R-HSA-1839130	1
680	FALSE	FALSE	TRUE	GAB1 signalosome.R-HSA-180292	1
681	FALSE	FALSE	TRUE	GRB2 events in ERBB2 signaling.R-HSA-1963640	1
682	FALSE	FALSE	TRUE	Signaling by WNT.R-HSA-195721	1
683	FALSE	FALSE	TRUE	GTP hydrolysis and joining of the 60S ribosomal subunit.R-HSA-72706	1
684	FALSE	FALSE	TRUE	Golgi Associated Vesicle Biogenesis.R-HSA-432722	1
685	FALSE	FALSE	TRUE	Regulation of TP53 Expression and Degradation.R-HSA-6806003	1
686	FALSE	FALSE	TRUE	Interaction between PHLDA1 and AURKA.R-HSA-8854521	1
687	FALSE	FALSE	TRUE	Intra-Golgi and retrograde Golgi-to-ER traffic.R-HSA-6811442	1
688	FALSE	FALSE	TRUE	Mitochondrial transcription initiation.R-HSA-163282	1
689	FALSE	FALSE	TRUE	Signaling by FGFR1 amplification mutants.R-HSA-1839120	1
690	FALSE	FALSE	TRUE	MET activates PI3K-AKT signaling.R-HSA-8851907	1
691	FALSE	FALSE	TRUE	MET activates PTK2 signaling.R-HSA-8874081	1
692	FALSE	FALSE	TRUE	MET activates PTPN11.R-HSA-8865999	1
693	FALSE	FALSE	TRUE	MET activates RAS signaling.R-HSA-8851805	1
694	FALSE	FALSE	TRUE	MET activates STAT3.R-HSA-8875791	1
695	FALSE	FALSE	TRUE	MET promotes cell motility.R-HSA-8875878	1
696	FALSE	FALSE	TRUE	Membrane Trafficking.R-HSA-199991	1
697	FALSE	FALSE	TRUE	Signal attenuation.R-HSA-74749	1
698	FALSE	FALSE	TRUE	Membrane binding and targetting of GAG proteins.R-HSA-174490	1
699	FALSE	FALSE	TRUE	Metabolism of amino acids and derivatives.R-HSA-71291	1
700	FALSE	FALSE	TRUE	Sialic acid metabolism.R-HSA-4085001	1
701	FALSE	FALSE	TRUE	Metabolism of cofactors.R-HSA-8978934	1
702	FALSE	FALSE	TRUE	Metabolism of nitric oxide: NOS3 activation and regulation.R-HSA-202131	1
703	FALSE	FALSE	TRUE	Metabolism of polyamines.R-HSA-351202	1
704	FALSE	FALSE	TRUE	Metabolism of proteins.R-HSA-392499	1
705	FALSE	FALSE	TRUE	Metabolism of steroids.R-HSA-8957322	1
706	FALSE	FALSE	TRUE	Miscellaneous substrates.R-HSA-211958	1
707	FALSE	FALSE	TRUE	Semaphorin interactions.R-HSA-373755	1
708	FALSE	FALSE	TRUE	Sema4D mediated inhibition of cell attachment and migration.R-HSA-416550	1
709	FALSE	FALSE	TRUE	Sema3A PAK dependent Axon repulsion.R-HSA-399954	1
710	FALSE	FALSE	TRUE	Mitochondrial biogenesis.R-HSA-1592230	1
711	FALSE	FALSE	TRUE	Lysosphingolipid and LPA receptors.R-HSA-419408	1
712	FALSE	FALSE	TRUE	Lysine catabolism.R-HSA-71064	1
713	FALSE	FALSE	TRUE	Loss of proteins required for interphase microtubule organization from the centrosome.R-HSA-380284	1
714	FALSE	FALSE	TRUE	Signaling by ERBB2 in Cancer.R-HSA-1227990	1
715	FALSE	FALSE	TRUE	Intracellular metabolism of fatty acids regulates insulin secretion.R-HSA-434313	1
716	FALSE	FALSE	TRUE	Intraflagellar transport.R-HSA-5620924	1
717	FALSE	FALSE	TRUE	Ionotropic activity of kainate receptors.R-HSA-451306	1
718	FALSE	FALSE	TRUE	Iron uptake and transport.R-HSA-917937	1
719	FALSE	FALSE	TRUE	JNK (c-Jun kinases) phosphorylation and activation mediated by activated human TAK1.R-HSA-450321	1
720	FALSE	FALSE	TRUE	Signaling by FGFR in disease.R-HSA-1226099	1
721	FALSE	FALSE	TRUE	Signaling by Erythropoietin.R-HSA-9006335	1
722	FALSE	FALSE	TRUE	Josephin domain DUBs.R-HSA-5689877	1
723	FALSE	FALSE	TRUE	Signaling by ERBB2.R-HSA-1227986	1
724	FALSE	FALSE	TRUE	Kinesins.R-HSA-983189	1
725	FALSE	FALSE	TRUE	Signaling by EGFR in Cancer.R-HSA-1643713	1
726	FALSE	FALSE	TRUE	L13a-mediated translational silencing of Ceruloplasmin expression.R-HSA-156827	1
727	FALSE	FALSE	TRUE	LGI-ADAM interactions.R-HSA-5682910	1
728	FALSE	FALSE	TRUE	Signaling by ERBB2 TMD-JMD mutants.R-HSA-9665686	1
729	FALSE	FALSE	TRUE	Leishmania parasite growth and survival.R-HSA-9664433	1
730	FALSE	FALSE	TRUE	Lipophagy.R-HSA-9613354	1
731	FALSE	FALSE	TRUE	Signaling by ERBB2 KD Mutants.R-HSA-9664565	1
732	FALSE	FALSE	TRUE	Loss of Nlp from mitotic centrosomes.R-HSA-380259	1
733	FALSE	FALSE	TRUE	Signaling by ERBB2 ECD mutants.R-HSA-9665348	1
734	FALSE	FALSE	TRUE	Signaling by EGFRvIII in Cancer.R-HSA-5637812	1
735	FALSE	TRUE	FALSE	Urea cycle.R-HSA-70635	1
736	TRUE	FALSE	FALSE	AMPK inhibits chREBP transcriptional activation activity.R-HSA-163680	1
737	FALSE	TRUE	FALSE	Unwinding of DNA.R-HSA-176974	1
738	TRUE	FALSE	FALSE	Recruitment and ATM-mediated phosphorylation of repair and signaling proteins at DNA double strand breaks.R-HSA-5693565	1
739	TRUE	FALSE	FALSE	Reproduction.R-HSA-1474165	1
740	TRUE	FALSE	FALSE	Response to elevated platelet cytosolic Ca2+.R-HSA-76005	1
741	TRUE	FALSE	FALSE	Retinoid metabolism and transport.R-HSA-975634	1
742	TRUE	FALSE	FALSE	Role of phospholipids in phagocytosis.R-HSA-2029485	1
743	TRUE	FALSE	FALSE	SHC-mediated cascade:FGFR2.R-HSA-5654699	1
744	TRUE	FALSE	FALSE	SIRT1 negatively regulates rRNA expression.R-HSA-427359	1
745	TRUE	FALSE	FALSE	STAT6-mediated induction of chemokines.R-HSA-3249367	1
746	TRUE	FALSE	FALSE	SUMOylation of DNA methylation proteins.R-HSA-4655427	1
747	TRUE	FALSE	FALSE	SUMOylation of intracellular receptors.R-HSA-4090294	1
748	TRUE	FALSE	FALSE	Scavenging by Class H Receptors.R-HSA-3000497	1
749	TRUE	FALSE	FALSE	Scavenging of heme from plasma.R-HSA-2168880	1
750	TRUE	FALSE	FALSE	Sema4D induced cell migration and growth-cone collapse.R-HSA-416572	1
751	TRUE	FALSE	FALSE	Signal regulatory protein family interactions.R-HSA-391160	1
752	TRUE	FALSE	FALSE	Signaling by EGFR.R-HSA-177929	1
753	TRUE	FALSE	FALSE	Signaling by FGFR2 amplification mutants.R-HSA-2023837	1
754	TRUE	FALSE	FALSE	Signaling by FGFR2 fusions.R-HSA-8853333	1
755	TRUE	FALSE	FALSE	Signaling by FGFR4 in disease.R-HSA-5655291	1
756	TRUE	FALSE	FALSE	Signaling by Interleukins.R-HSA-449147	1
757	TRUE	FALSE	FALSE	Signaling by NODAL.R-HSA-1181150	1
758	TRUE	FALSE	FALSE	Regulation of pyruvate dehydrogenase (PDH) complex.R-HSA-204174	1
759	TRUE	FALSE	FALSE	RUNX3 regulates NOTCH signaling.R-HSA-8941856	1
760	TRUE	FALSE	FALSE	Signaling by NOTCH1 in Cancer.R-HSA-2644603	1
761	TRUE	FALSE	FALSE	RUNX3 regulates CDKN1A transcription.R-HSA-8941855	1
762	TRUE	FALSE	FALSE	O-glycosylation of TSR domain-containing proteins.R-HSA-5173214	1
763	TRUE	FALSE	FALSE	O-linked glycosylation of mucins.R-HSA-913709	1
764	TRUE	FALSE	FALSE	O-linked glycosylation.R-HSA-5173105	1
765	TRUE	FALSE	FALSE	Other interleukin signaling.R-HSA-449836	1
766	TRUE	FALSE	FALSE	P2Y receptors.R-HSA-417957	1
767	TRUE	FALSE	FALSE	PTK6 Regulates RTKs and Their Effectors AKT1 and DOK1.R-HSA-8849469	1
768	TRUE	FALSE	FALSE	Plasma lipoprotein assembly, remodeling, and clearance.R-HSA-174824	1
769	TRUE	FALSE	FALSE	Plasma lipoprotein clearance.R-HSA-8964043	1
770	TRUE	FALSE	FALSE	Platelet degranulation .R-HSA-114608	1
771	TRUE	FALSE	FALSE	Positive epigenetic regulation of rRNA expression.R-HSA-5250913	1
772	TRUE	FALSE	FALSE	Post-translational protein phosphorylation.R-HSA-8957275	1
773	TRUE	FALSE	FALSE	Pre-NOTCH Expression and Processing.R-HSA-1912422	1
774	TRUE	FALSE	FALSE	Pre-NOTCH Transcription and Translation.R-HSA-1912408	1
775	TRUE	FALSE	FALSE	RHO GTPases Activate ROCKs.R-HSA-5627117	1
776	TRUE	FALSE	FALSE	RHO GTPases activate CIT.R-HSA-5625900	1
777	TRUE	FALSE	FALSE	RHO GTPases activate PAKs.R-HSA-5627123	1
778	TRUE	FALSE	FALSE	RNA Polymerase I Promoter Escape.R-HSA-73772	1
779	TRUE	FALSE	FALSE	RNA Polymerase I Transcription.R-HSA-73864	1
780	TRUE	FALSE	FALSE	RUNX1 regulates genes involved in megakaryocyte differentiation and platelet function.R-HSA-8936459	1
781	TRUE	FALSE	FALSE	Signaling by NOTCH.R-HSA-157118	1
782	TRUE	FALSE	FALSE	Signaling by NOTCH1 t(7
783	FALSE	TRUE	FALSE	Uncoating of the HIV Virion.R-HSA-162585	1
784	TRUE	FALSE	FALSE	TRIF-mediated programmed cell death.R-HSA-2562578	1
785	TRUE	FALSE	FALSE	Terminal pathway of complement.R-HSA-166665	1
786	TRUE	FALSE	FALSE	Termination of O-glycan biosynthesis.R-HSA-977068	1
787	TRUE	FALSE	FALSE	The AIM2 inflammasome.R-HSA-844615	1
788	TRUE	FALSE	FALSE	The IPAF inflammasome.R-HSA-844623	1
789	TRUE	FALSE	FALSE	Toll Like Receptor 3 (TLR3) Cascade.R-HSA-168164	1
790	TRUE	FALSE	FALSE	Transport of small molecules.R-HSA-382551	1
791	TRUE	FALSE	FALSE	VLDL assembly.R-HSA-8866423	1
792	TRUE	FALSE	FALSE	VLDL clearance.R-HSA-8964046	1
793	TRUE	FALSE	FALSE	Virus Assembly and Release.R-HSA-168268	1
794	TRUE	FALSE	FALSE	Visual phototransduction.R-HSA-2187338	1
795	TRUE	FALSE	FALSE	WNT mediated activation of DVL.R-HSA-201688	1
796	TRUE	FALSE	FALSE	tRNA modification in the mitochondrion.R-HSA-6787450	1
797	FALSE	TRUE	FALSE	2-LTR circle formation.R-HSA-164843	1
798	FALSE	TRUE	FALSE	APOBEC3G mediated resistance to HIV-1 infection.R-HSA-180689	1
799	FALSE	TRUE	FALSE	Acetylcholine Neurotransmitter Release Cycle.R-HSA-264642	1
800	FALSE	TRUE	FALSE	Activated NTRK2 signals through CDK5.R-HSA-9032845	1
801	FALSE	TRUE	FALSE	Activated NTRK2 signals through PI3K.R-HSA-9028335	1
802	FALSE	TRUE	FALSE	Activation of AMPA receptors.R-HSA-399710	1
803	FALSE	TRUE	FALSE	Activation of BAD and translocation to mitochondria .R-HSA-111447	1
804	TRUE	FALSE	FALSE	Telomere Extension By Telomerase.R-HSA-171319	1
805	TRUE	FALSE	FALSE	TRIF(TICAM1)-mediated TLR4 signaling .R-HSA-937061	1
806	TRUE	FALSE	FALSE	Signaling by NOTCH4.R-HSA-9013694	1
807	TRUE	FALSE	FALSE	TRAF6 mediated induction of NFkB and MAP kinases upon TLR7-8 or 9 activation.R-HSA-975138	1
808	TRUE	FALSE	FALSE	Signaling by Nuclear Receptors.R-HSA-9006931	1
809	TRUE	FALSE	FALSE	Signaling by Overexpressed Wild-Type EGFR in Cancer.R-HSA-5638302	1
810	TRUE	FALSE	FALSE	Signaling by PDGF.R-HSA-186797	1
811	TRUE	FALSE	FALSE	Signaling by Retinoic Acid.R-HSA-5362517	1
812	TRUE	FALSE	FALSE	Signaling by the B Cell Receptor (BCR).R-HSA-983705	1
813	TRUE	FALSE	FALSE	Sodium-coupled sulphate, di- and tri-carboxylate transporters.R-HSA-433137	1
814	TRUE	FALSE	FALSE	Stimuli-sensing channels.R-HSA-2672351	1
815	TRUE	FALSE	FALSE	Surfactant metabolism.R-HSA-5683826	1
816	TRUE	FALSE	FALSE	Synthesis of Dolichyl-phosphate.R-HSA-446199	1
817	TRUE	FALSE	FALSE	Synthesis of Leukotrienes (LT) and Eoxins (EX).R-HSA-2142691	1
818	TRUE	FALSE	FALSE	Synthesis of PA.R-HSA-1483166	1
819	TRUE	FALSE	FALSE	Synthesis of diphthamide-EEF2.R-HSA-5358493	1
820	TRUE	FALSE	FALSE	Synthesis, secretion, and inactivation of Glucose-dependent Insulinotropic Polypeptide (GIP).R-HSA-400511	1
821	TRUE	FALSE	FALSE	TAK1 activates NFkB by phosphorylation and activation of IKKs complex.R-HSA-445989	1
822	TRUE	FALSE	FALSE	TFAP2 (AP-2) family regulates transcription of cell cycle factors.R-HSA-8866911	1
823	TRUE	FALSE	FALSE	TFAP2 (AP-2) family regulates transcription of other transcription factors.R-HSA-8866906	1
824	TRUE	FALSE	FALSE	TICAM1-dependent activation of IRF3-IRF7.R-HSA-9013973	1
825	TRUE	FALSE	FALSE	TP53 Regulates Transcription of Caspase Activators and Caspases.R-HSA-6803207	1
826	TRUE	FALSE	FALSE	TRAF6 mediated IRF7 activation.R-HSA-933541	1
827	TRUE	FALSE	FALSE	Nonhomologous End-Joining (NHEJ).R-HSA-5693571	1
828	TRUE	FALSE	FALSE	NoRC negatively regulates rRNA expression.R-HSA-427413	1
829	TRUE	FALSE	FALSE	Negative epigenetic regulation of rRNA expression.R-HSA-5250941	1
830	TRUE	FALSE	FALSE	Collagen degradation.R-HSA-1442490	1
831	TRUE	FALSE	FALSE	Constitutive Signaling by NOTCH1 t(7
832	TRUE	FALSE	FALSE	Creation of C4 and C2 activators.R-HSA-166786	1
833	TRUE	FALSE	FALSE	DNA Damage-Telomere Stress Induced Senescence.R-HSA-2559586	1
834	TRUE	FALSE	FALSE	DNA Double Strand Break Response.R-HSA-5693606	1
835	TRUE	FALSE	FALSE	DNA Double-Strand Break Repair.R-HSA-5693532	1
836	TRUE	FALSE	FALSE	Dectin-2 family.R-HSA-5621480	1
837	TRUE	FALSE	FALSE	Degradation of the extracellular matrix.R-HSA-1474228	1
838	TRUE	FALSE	FALSE	Developmental Biology.R-HSA-1266738	1
839	TRUE	FALSE	FALSE	EGFR interacts with phospholipase C-gamma.R-HSA-212718	1
840	TRUE	FALSE	FALSE	ERKs are inactivated.R-HSA-202670	1
841	TRUE	FALSE	FALSE	Epigenetic regulation of gene expression.R-HSA-212165	1
842	TRUE	FALSE	FALSE	Estrogen-dependent gene expression.R-HSA-9018519	1
843	TRUE	FALSE	FALSE	Extracellular matrix organization.R-HSA-1474244	1
844	TRUE	FALSE	FALSE	Extrinsic Pathway of Fibrin Clot Formation.R-HSA-140834	1
845	TRUE	FALSE	FALSE	FCERI mediated Ca+2 mobilization.R-HSA-2871809	1
846	TRUE	FALSE	FALSE	FCGR activation.R-HSA-2029481	1
847	TRUE	FALSE	FALSE	FGFR2 ligand binding and activation.R-HSA-190241	1
848	TRUE	FALSE	FALSE	FGFR2 mutant receptor activation.R-HSA-1839126	1
849	TRUE	FALSE	FALSE	FGFR2b ligand binding and activation.R-HSA-190377	1
850	TRUE	FALSE	FALSE	Collagen formation.R-HSA-1474290	1
851	TRUE	FALSE	FALSE	Collagen chain trimerization.R-HSA-8948216	1
852	TRUE	FALSE	FALSE	Nectin-Necl trans heterodimerization.R-HSA-420597	1
853	TRUE	FALSE	FALSE	Collagen biosynthesis and modifying enzymes.R-HSA-1650814	1
854	TRUE	FALSE	FALSE	Acetylation.R-HSA-156582	1
855	TRUE	FALSE	FALSE	Activated point mutants of FGFR2.R-HSA-2033519	1
856	TRUE	FALSE	FALSE	Activation of IRF3-IRF7 mediated by TBK1-IKK epsilon.R-HSA-936964	1
857	TRUE	FALSE	FALSE	Activation of Matrix Metalloproteinases.R-HSA-1592389	1
858	TRUE	FALSE	FALSE	Activation of the AP-1 family of transcription factors.R-HSA-450341	1
859	TRUE	FALSE	FALSE	Antigen activates B Cell Receptor (BCR) leading to generation of second messengers.R-HSA-983695	1
860	TRUE	FALSE	FALSE	Apoptosis induced DNA fragmentation.R-HSA-140342	1
861	TRUE	FALSE	FALSE	Assembly of Viral Components at the Budding Site.R-HSA-168316	1
862	TRUE	FALSE	FALSE	Autophagy.R-HSA-9612973	1
863	TRUE	FALSE	FALSE	Butyrophilin (BTN) family interactions.R-HSA-8851680	1
864	TRUE	FALSE	FALSE	CD163 mediating an anti-inflammatory response.R-HSA-9662834	1
865	TRUE	FALSE	FALSE	Cam-PDE 1 activation.R-HSA-111957	1
866	TRUE	FALSE	FALSE	Caspase activation via Death Receptors in the presence of ligand.R-HSA-140534	1
867	TRUE	FALSE	FALSE	Cell surface interactions at the vascular wall.R-HSA-202733	1
868	TRUE	FALSE	FALSE	Cellular hexose transport.R-HSA-189200	1
869	TRUE	FALSE	FALSE	ChREBP activates metabolic gene expression.R-HSA-163765	1
870	TRUE	FALSE	FALSE	Chylomicron clearance.R-HSA-8964026	1
871	TRUE	FALSE	FALSE	Classical antibody-mediated complement activation.R-HSA-173623	1
872	TRUE	FALSE	FALSE	Clathrin-mediated endocytosis.R-HSA-8856828	1
873	TRUE	FALSE	FALSE	FOXO-mediated transcription of cell cycle genes.R-HSA-9617828	1
874	TRUE	FALSE	FALSE	Fcgamma receptor (FCGR) dependent phagocytosis.R-HSA-2029480	1
875	TRUE	FALSE	FALSE	Ficolins bind to repetitive carbohydrate structures on the target cell surface.R-HSA-2855086	1
876	TRUE	FALSE	FALSE	Formation of annular gap junctions.R-HSA-196025	1
877	TRUE	FALSE	FALSE	LDL remodeling.R-HSA-8964041	1
878	TRUE	FALSE	FALSE	Lectin pathway of complement activation.R-HSA-166662	1
879	TRUE	FALSE	FALSE	MAP kinase activation.R-HSA-450294	1
880	TRUE	FALSE	FALSE	MAP3K8 (TPL2)-dependent MAPK1-3 activation.R-HSA-5684264	1
881	TRUE	FALSE	FALSE	Meiosis.R-HSA-1500620	1
882	TRUE	FALSE	FALSE	Meiotic recombination.R-HSA-912446	1
883	TRUE	FALSE	FALSE	Meiotic synapsis.R-HSA-1221632	1
884	TRUE	FALSE	FALSE	Metabolism of Angiotensinogen to Angiotensins.R-HSA-2022377	1
885	TRUE	FALSE	FALSE	Metabolism of fat-soluble vitamins.R-HSA-6806667	1
886	TRUE	FALSE	FALSE	Methionine salvage pathway.R-HSA-1237112	1
887	TRUE	FALSE	FALSE	Mitotic Prophase.R-HSA-68875	1
888	TRUE	FALSE	FALSE	MyD88-independent TLR4 cascade .R-HSA-166166	1
889	TRUE	FALSE	FALSE	NADPH regeneration.R-HSA-389542	1
890	TRUE	FALSE	FALSE	NGF-stimulated transcription.R-HSA-9031628	1
891	TRUE	FALSE	FALSE	NOTCH4 Intracellular Domain Regulates Transcription.R-HSA-9013695	1
892	TRUE	FALSE	FALSE	NR1H2 & NR1H3 regulate gene expression linked to lipogenesis.R-HSA-9029558	1
893	TRUE	FALSE	FALSE	NR1H2 & NR1H3 regulate gene expression to limit cholesterol uptake .R-HSA-9031525	1
894	TRUE	FALSE	FALSE	NR1H2 and NR1H3-mediated signaling.R-HSA-9024446	1
895	TRUE	FALSE	FALSE	NR1H3 & NR1H2 regulate gene expression linked to cholesterol transport and efflux.R-HSA-9029569	1
896	TRUE	FALSE	FALSE	Ion channel transport.R-HSA-983712	1
897	TRUE	FALSE	FALSE	Invadopodia formation.R-HSA-8941237	1
898	TRUE	FALSE	FALSE	Interleukin-6 signaling.R-HSA-1059683	1
899	TRUE	FALSE	FALSE	Hedgehog ligand biogenesis.R-HSA-5358346	1
900	TRUE	FALSE	FALSE	G alpha (i) signalling events.R-HSA-418594	1
901	TRUE	FALSE	FALSE	G2-M DNA damage checkpoint.R-HSA-69473	1
902	TRUE	FALSE	FALSE	GPCR downstream signalling.R-HSA-388396	1
903	TRUE	FALSE	FALSE	Gamma carboxylation, hypusine formation and arylsulfatase activation.R-HSA-163841	1
904	TRUE	FALSE	FALSE	Gap junction assembly.R-HSA-190861	1
905	TRUE	FALSE	FALSE	Gap junction degradation.R-HSA-190873	1
906	TRUE	FALSE	FALSE	Gap junction trafficking.R-HSA-190828	1
907	TRUE	FALSE	FALSE	HDL clearance.R-HSA-8964011	1
908	TRUE	FALSE	FALSE	IKK complex recruitment mediated by RIP1.R-HSA-937041	1
909	TRUE	FALSE	FALSE	Interleukin-4 and Interleukin-13 signaling.R-HSA-6785807	1
910	TRUE	FALSE	FALSE	Inhibition of Signaling by Overexpressed EGFR.R-HSA-5638303	1
911	TRUE	FALSE	FALSE	Inhibition of TSC complex formation by PKB.R-HSA-165181	1
912	TRUE	FALSE	FALSE	Innate Immune System.R-HSA-168249	1
913	TRUE	FALSE	FALSE	Interleukin-1 processing.R-HSA-448706	1
914	TRUE	FALSE	FALSE	Interleukin-17 signaling.R-HSA-448424	1
915	TRUE	FALSE	FALSE	Interleukin-18 signaling.R-HSA-9012546	1
916	TRUE	FALSE	FALSE	Interleukin-20 family signaling.R-HSA-8854691	1
917	TRUE	FALSE	FALSE	Interleukin-23 signaling.R-HSA-9020933	1
918	FALSE	TRUE	FALSE	Activation of BH3-only proteins.R-HSA-114452	1
919	FALSE	TRUE	FALSE	Activation of BMF and translocation to mitochondria.R-HSA-139910	1
920	FALSE	TRUE	FALSE	Activation of NMDA receptors and postsynaptic events.R-HSA-442755	1
921	FALSE	TRUE	FALSE	Polymerase switching.R-HSA-69091	1
922	FALSE	TRUE	FALSE	Postmitotic nuclear pore complex (NPC) reformation.R-HSA-9615933	1
923	FALSE	TRUE	FALSE	Prefoldin mediated transfer of substrate to CCT-TriC.R-HSA-389957	1
924	FALSE	TRUE	FALSE	Processing and activation of SUMO.R-HSA-3215018	1
925	FALSE	TRUE	FALSE	Processive synthesis on the lagging strand.R-HSA-69183	1
926	FALSE	TRUE	FALSE	Prolactin receptor signaling.R-HSA-1170546	1
927	FALSE	TRUE	FALSE	Prolonged ERK activation events.R-HSA-169893	1
928	FALSE	TRUE	FALSE	Protein folding.R-HSA-391251	1
929	FALSE	TRUE	FALSE	RAB GEFs exchange GTP for GDP on RABs.R-HSA-8876198	1
930	FALSE	TRUE	FALSE	RMTs methylate histone arginines.R-HSA-3214858	1
931	FALSE	TRUE	FALSE	Rab regulation of trafficking.R-HSA-9007101	1
932	FALSE	TRUE	FALSE	Ras activation upon Ca2+ influx through NMDA receptor.R-HSA-442982	1
933	FALSE	TRUE	FALSE	Recycling of eIF2:GDP.R-HSA-72731	1
934	FALSE	TRUE	FALSE	Regulation of PTEN mRNA translation.R-HSA-8943723	1
935	FALSE	TRUE	FALSE	Regulation of RUNX2 expression and activity.R-HSA-8939902	1
936	FALSE	TRUE	FALSE	Regulation of TP53 Activity through Methylation.R-HSA-6804760	1
937	FALSE	TRUE	FALSE	Regulation of beta-cell development.R-HSA-186712	1
938	FALSE	TRUE	FALSE	Regulation of gene expression in endocrine-committed (NEUROG3+) progenitor cells.R-HSA-210746	1
939	FALSE	TRUE	FALSE	Regulation of gene expression in late stage (branching morphogenesis) pancreatic bud precursor cells.R-HSA-210744	1
940	FALSE	TRUE	FALSE	Regulation of localization of FOXO transcription factors.R-HSA-9614399	1
941	FALSE	TRUE	FALSE	Post NMDA receptor activation events.R-HSA-438064	1
942	FALSE	TRUE	FALSE	Polymerase switching on the C-strand of the telomere.R-HSA-174411	1
943	FALSE	TRUE	FALSE	Mitochondrial translation termination.R-HSA-5419276	1
944	FALSE	TRUE	FALSE	Plus-strand DNA synthesis.R-HSA-164525	1
945	FALSE	TRUE	FALSE	NIK-->noncanonical NF-kB signaling.R-HSA-5676590	1
946	FALSE	TRUE	FALSE	NTRK2 activates RAC1.R-HSA-9032759	1
947	FALSE	TRUE	FALSE	Neddylation.R-HSA-8951664	1
948	FALSE	TRUE	FALSE	Nef and signal transduction.R-HSA-164944	1
949	FALSE	TRUE	FALSE	Nef mediated downregulation of MHC class I complex cell surface expression.R-HSA-164940	1
950	FALSE	TRUE	FALSE	Neurotoxicity of clostridium toxins.R-HSA-168799	1
951	FALSE	TRUE	FALSE	Neurotransmitter receptors and postsynaptic signal transmission.R-HSA-112314	1
952	FALSE	TRUE	FALSE	Norepinephrine Neurotransmitter Release Cycle.R-HSA-181430	1
953	FALSE	TRUE	FALSE	Nucleotide Excision Repair.R-HSA-5696398	1
954	FALSE	TRUE	FALSE	Orexin and neuropeptides FF and QRFP bind to their respective receptors.R-HSA-389397	1
955	FALSE	TRUE	FALSE	Organic anion transport.R-HSA-561048	1
956	FALSE	TRUE	FALSE	PAOs oxidise polyamines to amines.R-HSA-141334	1
957	FALSE	TRUE	FALSE	PDE3B signalling.R-HSA-165160	1
958	FALSE	TRUE	FALSE	PI-3K cascade:FGFR4.R-HSA-5654720	1
959	FALSE	TRUE	FALSE	PI5P Regulates TP53 Acetylation.R-HSA-6811555	1
960	FALSE	TRUE	FALSE	PKB-mediated events.R-HSA-109703	1
961	FALSE	TRUE	FALSE	PTK6 Regulates RHO GTPases, RAS GTPase and MAP kinases.R-HSA-8849471	1
962	FALSE	TRUE	FALSE	Peptide hormone biosynthesis.R-HSA-209952	1
963	FALSE	TRUE	FALSE	Phase II - Conjugation of compounds.R-HSA-156580	1
964	FALSE	TRUE	FALSE	Release of apoptotic factors from the mitochondria.R-HSA-111457	1
965	FALSE	TRUE	FALSE	Removal of the Flap Intermediate.R-HSA-69166	1
966	FALSE	TRUE	FALSE	Resolution of AP sites via the single-nucleotide replacement pathway.R-HSA-110381	1
967	FALSE	TRUE	FALSE	Retinoid cycle disease events.R-HSA-2453864	1
968	FALSE	TRUE	FALSE	Synthesis of bile acids and bile salts via 24-hydroxycholesterol.R-HSA-193775	1
969	FALSE	TRUE	FALSE	TBC-RABGAPs.R-HSA-8854214	1
970	FALSE	TRUE	FALSE	Tachykinin receptors bind tachykinins.R-HSA-380095	1
971	FALSE	TRUE	FALSE	Telomere C-strand (Lagging Strand) Synthesis.R-HSA-174417	1
972	FALSE	TRUE	FALSE	Telomere C-strand synthesis initiation.R-HSA-174430	1
973	FALSE	TRUE	FALSE	The role of Nef in HIV-1 replication and disease pathogenesis.R-HSA-164952	1
974	FALSE	TRUE	FALSE	Toxicity of botulinum toxin type A (BoNT-A).R-HSA-5250968	1
975	FALSE	TRUE	FALSE	Toxicity of botulinum toxin type C (BoNT-C).R-HSA-5250971	1
976	FALSE	TRUE	FALSE	Toxicity of botulinum toxin type E (BoNT-E).R-HSA-5250992	1
977	FALSE	TRUE	FALSE	Toxicity of botulinum toxin type G (BoNT-G).R-HSA-5250989	1
978	FALSE	TRUE	FALSE	Toxicity of tetanus toxin (TeNT).R-HSA-5250982	1
979	FALSE	TRUE	FALSE	Trafficking of AMPA receptors.R-HSA-399719	1
980	FALSE	TRUE	FALSE	Trafficking of GluR2-containing AMPA receptors.R-HSA-416993	1
981	FALSE	TRUE	FALSE	Translesion synthesis by POLI.R-HSA-5656121	1
982	FALSE	TRUE	FALSE	Translesion synthesis by POLK.R-HSA-5655862	1
983	FALSE	TRUE	FALSE	Translesion synthesis by REV1.R-HSA-110312	1
984	FALSE	TRUE	FALSE	Translesion synthesis by Y family DNA polymerases bypasses lesions on DNA template.R-HSA-110313	1
985	FALSE	TRUE	FALSE	Tryptophan catabolism.R-HSA-71240	1
986	FALSE	TRUE	FALSE	Ub-specific processing proteases.R-HSA-5689880	1
987	FALSE	TRUE	FALSE	Synthesis of active ubiquitin: roles of E1 and E2 enzymes.R-HSA-8866652	1
988	FALSE	TRUE	FALSE	Synthesis of PIPs at the ER membrane.R-HSA-1483248	1
989	FALSE	TRUE	FALSE	Synthesis of DNA.R-HSA-69239	1
990	FALSE	TRUE	FALSE	Signaling by NOTCH2.R-HSA-1980145	1
991	FALSE	TRUE	FALSE	Retrograde neurotrophin signalling.R-HSA-177504	1
992	FALSE	TRUE	FALSE	Reverse Transcription of HIV RNA.R-HSA-162589	1
993	FALSE	TRUE	FALSE	SHC-mediated cascade:FGFR4.R-HSA-5654719	1
994	FALSE	TRUE	FALSE	SUMO is conjugated to E1 (UBA2:SAE1).R-HSA-3065676	1
995	FALSE	TRUE	FALSE	SUMO is transferred from E1 to E2 (UBE2I, UBC9).R-HSA-3065678	1
996	FALSE	TRUE	FALSE	SUMOylation of SUMOylation proteins.R-HSA-4085377	1
997	FALSE	TRUE	FALSE	Serotonin Neurotransmitter Release Cycle.R-HSA-181429	1
998	FALSE	TRUE	FALSE	Signaling by FGFR4.R-HSA-5654743	1
999	FALSE	TRUE	FALSE	Signaling by NTRK2 (TRKB).R-HSA-9006115	1
1000	FALSE	TRUE	FALSE	Synthesis of (16-20)-hydroxyeicosatetraenoic acids (HETE).R-HSA-2142816	1
1001	FALSE	TRUE	FALSE	Signaling by NTRKs.R-HSA-166520	1
1002	FALSE	TRUE	FALSE	Signaling by PDGFR in disease.R-HSA-9671555	1
1003	FALSE	TRUE	FALSE	Signaling by PDGFRA extracellular domain mutants.R-HSA-9673770	1
1004	FALSE	TRUE	FALSE	Signaling by PDGFRA transmembrane, juxtamembrane and kinase domain mutants.R-HSA-9673767	1
1005	FALSE	TRUE	FALSE	Signaling by WNT in cancer.R-HSA-4791275	1
1006	FALSE	TRUE	FALSE	Signalling to ERKs.R-HSA-187687	1
1007	FALSE	TRUE	FALSE	Signalling to p38 via RIT and RIN.R-HSA-187706	1
1008	FALSE	TRUE	FALSE	Switching of origins to a post-replicative state.R-HSA-69052	1
1009	FALSE	TRUE	FALSE	Mitochondrial translation.R-HSA-5368287	1
1010	FALSE	TRUE	FALSE	Mitochondrial translation initiation.R-HSA-5368286	1
1011	FALSE	TRUE	FALSE	Activation of Na-permeable kainate receptors.R-HSA-451307	1
1012	FALSE	TRUE	FALSE	CREB1 phosphorylation through NMDA receptor-mediated activation of RAS signaling.R-HSA-442742	1
1013	FALSE	TRUE	FALSE	CaMK IV-mediated phosphorylation of CREB.R-HSA-111932	1
1014	FALSE	TRUE	FALSE	Carnitine synthesis.R-HSA-71262	1
1015	FALSE	TRUE	FALSE	Chk1-Chk2(Cds1) mediated inactivation of Cyclin B:Cdk1 complex.R-HSA-75035	1
1016	FALSE	TRUE	FALSE	Cholesterol biosynthesis via lathosterol.R-HSA-6807062	1
1017	FALSE	TRUE	FALSE	Class I MHC mediated antigen processing & presentation.R-HSA-983169	1
1018	FALSE	TRUE	FALSE	Class I peroxisomal membrane protein import.R-HSA-9603798	1
1019	FALSE	TRUE	FALSE	Competing endogenous RNAs (ceRNAs) regulate PTEN translation.R-HSA-8948700	1
1020	FALSE	TRUE	FALSE	Cytosolic sulfonation of small molecules.R-HSA-156584	1
1021	FALSE	TRUE	FALSE	DNA Replication Pre-Initiation.R-HSA-69002	1
1022	FALSE	TRUE	FALSE	DNA Replication.R-HSA-69306	1
1023	FALSE	TRUE	FALSE	DNA replication initiation.R-HSA-68952	1
1024	FALSE	TRUE	FALSE	DNA strand elongation.R-HSA-69190	1
1025	FALSE	TRUE	FALSE	Dectin-1 mediated noncanonical NF-kB signaling.R-HSA-5607761	1
1026	FALSE	TRUE	FALSE	Diseases associated with visual transduction.R-HSA-2474795	1
1027	FALSE	TRUE	FALSE	Diseases of the neuronal system.R-HSA-9675143	1
1028	FALSE	TRUE	FALSE	Displacement of DNA glycosylase by APEX1.R-HSA-110357	1
1029	FALSE	TRUE	FALSE	Dopamine Neurotransmitter Release Cycle.R-HSA-212676	1
1030	FALSE	TRUE	FALSE	Downstream signaling of activated FGFR4.R-HSA-5654716	1
1031	FALSE	TRUE	FALSE	Dual Incision in GG-NER.R-HSA-5696400	1
1032	FALSE	TRUE	FALSE	CREB1 phosphorylation through the activation of CaMKII-CaMKK-CaMKIV cascasde.R-HSA-442729	1
1033	FALSE	TRUE	FALSE	COPI-independent Golgi-to-ER retrograde traffic.R-HSA-6811436	1
1034	FALSE	TRUE	FALSE	Mitochondrial translation elongation.R-HSA-5389840	1
1035	FALSE	TRUE	FALSE	CD28 dependent PI3K-Akt signaling.R-HSA-389357	1
1036	FALSE	TRUE	FALSE	Activation of RAS in B cells.R-HSA-1169092	1
1037	FALSE	TRUE	FALSE	Activation of kainate receptors upon glutamate binding.R-HSA-451326	1
1038	FALSE	TRUE	FALSE	Activation of the pre-replicative complex.R-HSA-68962	1
1039	FALSE	TRUE	FALSE	Adaptive Immune System.R-HSA-1280218	1
1040	FALSE	TRUE	FALSE	Aggrephagy.R-HSA-9646399	1
1041	FALSE	TRUE	FALSE	Amine Oxidase reactions.R-HSA-140179	1
1042	FALSE	TRUE	FALSE	Amyloid fiber formation.R-HSA-977225	1
1043	FALSE	TRUE	FALSE	Androgen biosynthesis.R-HSA-193048	1
1044	FALSE	TRUE	FALSE	Antigen processing: Ubiquitination & Proteasome degradation.R-HSA-983168	1
1045	FALSE	TRUE	FALSE	Apoptotic factor-mediated response.R-HSA-111471	1
1046	FALSE	TRUE	FALSE	Assembly and cell surface presentation of NMDA receptors.R-HSA-9609736	1
1047	FALSE	TRUE	FALSE	Association of TriC-CCT with target proteins during biosynthesis.R-HSA-390471	1
1048	FALSE	TRUE	FALSE	Autointegration results in viral DNA circles.R-HSA-177539	1
1049	FALSE	TRUE	FALSE	BDNF activates NTRK2 (TRKB) signaling.R-HSA-9024909	1
1050	FALSE	TRUE	FALSE	Beta-oxidation of pristanoyl-CoA.R-HSA-389887	1
1051	FALSE	TRUE	FALSE	Biosynthesis of A2E, implicated in retinal degradation.R-HSA-2466712	1
1052	FALSE	TRUE	FALSE	Breakdown of the nuclear lamina.R-HSA-352238	1
1053	FALSE	TRUE	FALSE	Budding and maturation of HIV virion.R-HSA-162588	1
1054	FALSE	TRUE	FALSE	C-type lectin receptors (CLRs).R-HSA-5621481	1
1055	FALSE	TRUE	FALSE	Erythropoietin activates Phosphoinositide-3-kinase (PI3K).R-HSA-9027276	1
1056	FALSE	TRUE	FALSE	Estrogen-stimulated signaling through PRKCZ.R-HSA-9634635	1
1057	FALSE	TRUE	FALSE	Extension of Telomeres.R-HSA-180786	1
1058	FALSE	TRUE	FALSE	FGFR4 ligand binding and activation.R-HSA-190322	1
1059	FALSE	TRUE	FALSE	Interaction between L1 and Ankyrins.R-HSA-445095	1
1060	FALSE	TRUE	FALSE	Interactions of Tat with host cellular proteins.R-HSA-176034	1
1061	FALSE	TRUE	FALSE	Interconversion of nucleotide di- and triphosphates.R-HSA-499943	1
1062	FALSE	TRUE	FALSE	Interconversion of polyamines.R-HSA-351200	1
1063	FALSE	TRUE	FALSE	Intrinsic Pathway for Apoptosis.R-HSA-109606	1
1064	FALSE	TRUE	FALSE	Lagging Strand Synthesis.R-HSA-69186	1
1065	FALSE	TRUE	FALSE	Leading Strand Synthesis.R-HSA-69109	1
1066	FALSE	TRUE	FALSE	Linoleic acid (LA) metabolism.R-HSA-2046105	1
1067	FALSE	TRUE	FALSE	Lysosome Vesicle Biogenesis.R-HSA-432720	1
1068	FALSE	TRUE	FALSE	MHC class II antigen presentation.R-HSA-2132295	1
1069	FALSE	TRUE	FALSE	MTOR signalling.R-HSA-165159	1
1070	FALSE	TRUE	FALSE	Metabolism of folate and pterines.R-HSA-196757	1
1071	FALSE	TRUE	FALSE	Metabolism of nucleotides.R-HSA-15869	1
1072	FALSE	TRUE	FALSE	Metabolism of steroid hormones.R-HSA-196071	1
1073	FALSE	TRUE	FALSE	MicroRNA (miRNA) biogenesis.R-HSA-203927	1
1074	FALSE	TRUE	FALSE	Minus-strand DNA synthesis.R-HSA-164516	1
1075	FALSE	TRUE	FALSE	Mismatch Repair.R-HSA-5358508	1
1076	FALSE	TRUE	FALSE	Mismatch repair (MMR) directed by MSH2:MSH3 (MutSbeta).R-HSA-5358606	1
1077	FALSE	TRUE	FALSE	Mismatch repair (MMR) directed by MSH2:MSH6 (MutSalpha).R-HSA-5358565	1
1078	FALSE	TRUE	FALSE	Integration of viral DNA into host genomic DNA.R-HSA-175567	1
1079	FALSE	TRUE	FALSE	Integration of provirus.R-HSA-162592	1
1080	FALSE	TRUE	FALSE	Inhibition of replication initiation of damaged DNA by RB1-E2F1.R-HSA-113501	1
1081	FALSE	TRUE	FALSE	Free fatty acid receptors.R-HSA-444209	1
1082	FALSE	TRUE	FALSE	FOXO-mediated transcription of cell death genes.R-HSA-9614657	1
1083	FALSE	TRUE	FALSE	FOXO-mediated transcription of oxidative stress, metabolic and neuronal genes.R-HSA-9615017	1
1084	FALSE	TRUE	FALSE	FRS-mediated FGFR4 signaling.R-HSA-5654712	1
1085	FALSE	TRUE	FALSE	Fatty Acids bound to GPR40 (FFAR1) regulate insulin secretion.R-HSA-434316	1
1086	FALSE	TRUE	FALSE	Fatty acids.R-HSA-211935	1
1087	FALSE	TRUE	FALSE	Formation of Incision Complex in GG-NER.R-HSA-5696395	1
1088	FALSE	TRUE	FALSE	Formation of RNA Pol II elongation complex .R-HSA-112382	1
1089	FALSE	TRUE	FALSE	Formation of tubulin folding intermediates by CCT-TriC.R-HSA-389960	1
1090	FALSE	TRUE	FALSE	GRB2 events in EGFR signaling.R-HSA-179812	1
1091	FALSE	TRUE	FALSE	IRS activation.R-HSA-74713	1
1092	FALSE	TRUE	FALSE	Global Genome Nucleotide Excision Repair (GG-NER).R-HSA-5696399	1
1093	FALSE	TRUE	FALSE	Glutamate Neurotransmitter Release Cycle.R-HSA-210500	1
1094	FALSE	TRUE	FALSE	Glutamate binding, activation of AMPA receptors and synaptic plasticity.R-HSA-399721	1
1095	FALSE	TRUE	FALSE	Glycine degradation.R-HSA-6783984	1
1096	FALSE	TRUE	FALSE	Glycoprotein hormones.R-HSA-209822	1
1097	FALSE	TRUE	FALSE	Histidine catabolism.R-HSA-70921	1
1098	FALSE	TRUE	FALSE	IRAK1 recruits IKK complex upon TLR7-8 or 9 stimulation.R-HSA-975144	1
1099	FALSE	TRUE	FALSE	IRAK1 recruits IKK complex.R-HSA-937039	1
1100	FALSE	FALSE	TRUE	trans-Golgi Network Vesicle Budding.R-HSA-199992	1
