# Supplementary material for: Defining the progeria phenome
Source: Aging (Albany NY). 2024 Feb 9;16(3):2026–46. doi: 10.18632/aging.205537 (PMC10911340; doi:10.18632/aging.205537)
Supplement: Supplementary Table 3 [file aging-16-205537-s004.xls]

## Sheet: group 3 up
Supplementary Table 3. Gene expression pathway analysis of Bloom syndrome and Nijmegen breakage syndrome.
	Nijmegen breakage syndrome	Bloom syndrome	id	num
0	TRUE	TRUE	AKT phosphorylates targets in the cytosol.R-HSA-198323	2
1	TRUE	TRUE	RNA Polymerase II Promoter Escape.R-HSA-73776	2		Transcription
2	TRUE	TRUE	Norepinephrine Neurotransmitter Release Cycle.R-HSA-181430	2		Inflammation
3	TRUE	TRUE	OAS antiviral response.R-HSA-8983711	2		DNA damage response
4	TRUE	TRUE	Organelle biogenesis and maintenance.R-HSA-1852241	2		Growth signalling
5	TRUE	TRUE	Other interleukin signaling.R-HSA-449836	2
6	TRUE	TRUE	PD-1 signaling.R-HSA-389948	2
7	TRUE	TRUE	PI3K events in ERBB2 signaling.R-HSA-1963642	2
8	TRUE	TRUE	PINK1-PRKN Mediated Mitophagy.R-HSA-5205685	2
9	TRUE	TRUE	PIP3 activates AKT signaling.R-HSA-1257604	2
10	TRUE	TRUE	PKA activation in glucagon signalling.R-HSA-164378	2
11	TRUE	TRUE	PKA activation.R-HSA-163615	2
12	TRUE	TRUE	PKA-mediated phosphorylation of CREB.R-HSA-111931	2
13	TRUE	TRUE	PTEN Regulation.R-HSA-6807070	2
14	TRUE	TRUE	PTK6 Regulates RHO GTPases, RAS GTPase and MAP kinases.R-HSA-8849471	2
15	TRUE	TRUE	Peroxisomal protein import.R-HSA-9033241	2
16	TRUE	TRUE	Post-transcriptional silencing by small RNAs.R-HSA-426496	2
17	TRUE	TRUE	Protein localization.R-HSA-9609507	2
18	TRUE	TRUE	RAB GEFs exchange GTP for GDP on RABs.R-HSA-8876198	2
19	TRUE	TRUE	RNA Pol II CTD phosphorylation and interaction with CE during HIV infection.R-HSA-167160	2
20	TRUE	TRUE	RNA Pol II CTD phosphorylation and interaction with CE.R-HSA-77075	2
21	TRUE	TRUE	Neurodegenerative Diseases.R-HSA-8863678	2
22	TRUE	TRUE	Netrin-1 signaling.R-HSA-373752	2
23	TRUE	TRUE	Negative regulators of DDX58-IFIH1 signaling.R-HSA-936440	2
24	TRUE	TRUE	MET Receptor Activation.R-HSA-6806942	2
25	TRUE	TRUE	Interleukin-35 Signalling.R-HSA-8984722	2
26	TRUE	TRUE	Interleukin-4 and Interleukin-13 signaling.R-HSA-6785807	2
27	TRUE	TRUE	Intracellular signaling by second messengers.R-HSA-9006925	2
28	TRUE	TRUE	Intraflagellar transport.R-HSA-5620924	2
29	TRUE	TRUE	Listeria monocytogenes entry into host cells.R-HSA-8876384	2
30	TRUE	TRUE	Localization of the PINCH-ILK-PARVIN complex to focal adhesions.R-HSA-446343	2
31	TRUE	TRUE	MAPK targets- Nuclear events mediated by MAP kinases.R-HSA-450282	2
32	TRUE	TRUE	MAPK6-MAPK4 signaling.R-HSA-5687128	2
33	TRUE	TRUE	MET promotes cell motility.R-HSA-8875878	2
34	TRUE	TRUE	Negative regulation of MET activity.R-HSA-6807004	2
35	TRUE	TRUE	Metabolism of Angiotensinogen to Angiotensins.R-HSA-2022377	2
36	TRUE	TRUE	Metallothioneins bind metals.R-HSA-5661231	2
37	TRUE	TRUE	Methionine salvage pathway.R-HSA-1237112	2
38	TRUE	TRUE	Methylation.R-HSA-156581	2
39	TRUE	TRUE	Mitophagy.R-HSA-5205647	2
40	TRUE	TRUE	Mitotic Telophase-Cytokinesis.R-HSA-68884	2
41	TRUE	TRUE	Myogenesis.R-HSA-525793	2
42	TRUE	TRUE	NOTCH2 Activation and Transmission of Signal to the Nucleus.R-HSA-2979096	2
43	TRUE	TRUE	RNA Polymerase II HIV Promoter Escape.R-HSA-167162	2
44	TRUE	TRUE	RNA Polymerase II Transcription Initiation And Promoter Clearance.R-HSA-76042	2
45	TRUE	TRUE	Interferon gamma signaling.R-HSA-877300	2
46	TRUE	TRUE	RNA Polymerase II Transcription Initiation.R-HSA-75953	2
47	TRUE	TRUE	Signaling by PDGFRA transmembrane, juxtamembrane and kinase domain mutants.R-HSA-9673767	2
48	TRUE	TRUE	Signaling by SCF-KIT.R-HSA-1433557	2
49	TRUE	TRUE	Signaling by TGFB family members.R-HSA-9006936	2
50	TRUE	TRUE	Signaling by VEGF.R-HSA-194138	2
51	TRUE	TRUE	Signaling by WNT in cancer.R-HSA-4791275	2
52	TRUE	TRUE	Sphingolipid de novo biosynthesis.R-HSA-1660661	2
53	TRUE	TRUE	Sphingolipid metabolism.R-HSA-428157	2
54	TRUE	TRUE	Synthesis of PIPs at the plasma membrane.R-HSA-1660499	2
55	TRUE	TRUE	TP53 regulates transcription of several additional cell death genes whose specific roles in p53-dependent apoptosis remain uncertain.R-HSA-6803205	2
56	TRUE	TRUE	The NLRP3 inflammasome.R-HSA-844456	2
57	TRUE	TRUE	Transcriptional regulation by RUNX2.R-HSA-8878166	2
58	TRUE	TRUE	Translesion synthesis by Y family DNA polymerases bypasses lesions on DNA template.R-HSA-110313	2
59	TRUE	TRUE	VEGF binds to VEGFR leading to receptor dimerization.R-HSA-195399	2
60	TRUE	TRUE	VEGF ligand-receptor interactions.R-HSA-194313	2
61	TRUE	TRUE	VEGFA-VEGFR2 Pathway.R-HSA-4420097	2
62	TRUE	TRUE	WNT ligand secretion is abrogated by the PORCN inhibitor LGK974.R-HSA-5340573	2
63	TRUE	TRUE	cGMP effects.R-HSA-418457	2
64	TRUE	TRUE	mRNA Capping.R-HSA-72086	2
65	TRUE	TRUE	mRNA decay by 5' to 3' exoribonuclease.R-HSA-430039	2
66	TRUE	TRUE	Signaling by PDGFRA extracellular domain mutants.R-HSA-9673770	2
67	TRUE	TRUE	Signaling by PDGFR in disease.R-HSA-9671555	2
68	TRUE	TRUE	Signaling by Hippo.R-HSA-2028269	2
69	TRUE	TRUE	Receptor Mediated Mitophagy.R-HSA-8934903	2
70	TRUE	TRUE	RNA Polymerase II Transcription Pre-Initiation And Promoter Opening.R-HSA-73779	2
71	TRUE	TRUE	RNA polymerase II transcribes snRNA genes.R-HSA-6807505	2
72	TRUE	TRUE	RUNX1 and FOXP3 control the development of regulatory T lymphocytes (Tregs).R-HSA-8877330	2
73	TRUE	TRUE	RUNX2 regulates genes involved in differentiation of myeloid cells.R-HSA-8941333	2
74	TRUE	TRUE	RUNX3 regulates BCL2L11 (BIM) transcription.R-HSA-8952158	2
75	TRUE	TRUE	RUNX3 regulates WNT signaling.R-HSA-8951430	2
76	TRUE	TRUE	Rab regulation of trafficking.R-HSA-9007101	2
77	TRUE	TRUE	Rap1 signalling.R-HSA-392517	2
78	TRUE	TRUE	Reelin signalling pathway.R-HSA-8866376	2
79	TRUE	TRUE	SMAD2-SMAD3:SMAD4 heterotrimer regulates transcription.R-HSA-2173796	2
80	TRUE	TRUE	Regulation of HSF1-mediated heat shock response.R-HSA-3371453	2
81	TRUE	TRUE	Regulation of PTEN mRNA translation.R-HSA-8943723	2
82	TRUE	TRUE	Regulation of PTEN stability and activity.R-HSA-8948751	2
83	TRUE	TRUE	Regulation of RUNX1 Expression and Activity.R-HSA-8934593	2
84	TRUE	TRUE	Regulation of TP53 Expression.R-HSA-6804754	2
85	TRUE	TRUE	Regulation of mRNA stability by proteins that bind AU-rich elements.R-HSA-450531	2
86	TRUE	TRUE	SEMA3A-Plexin repulsion signaling by inhibiting Integrin adhesion.R-HSA-399955	2
87	TRUE	TRUE	SHC-related events triggered by IGF1R.R-HSA-2428933	2
88	TRUE	TRUE	Interleukin-10 signaling.R-HSA-6783783	2
89	TRUE	TRUE	TP53 Regulates Transcription of Genes Involved in Cytochrome C Release.R-HSA-6803204	2
90	TRUE	TRUE	Interferon alpha-beta signaling.R-HSA-909733	2
91	TRUE	TRUE	DNA Damage Bypass.R-HSA-73893	2
92	TRUE	TRUE	FGFR1c and Klotho ligand binding and activation.R-HSA-190374	2
93	TRUE	TRUE	Extra-nuclear estrogen signaling.R-HSA-9009391	2
94	TRUE	TRUE	Acetylcholine Neurotransmitter Release Cycle.R-HSA-264642	2
95	TRUE	TRUE	Estrogen-dependent nuclear events downstream of ESR-membrane signaling.R-HSA-9634638	2
96	TRUE	TRUE	Endosomal-Vacuolar pathway.R-HSA-1236977	2
97	TRUE	TRUE	Activation of NOXA and translocation to mitochondria.R-HSA-111448	2
98	TRUE	TRUE	Activation of RAC1.R-HSA-428540	2
99	TRUE	TRUE	EPHB-mediated forward signaling.R-HSA-3928662	2
100	TRUE	TRUE	EGFR downregulation.R-HSA-182971	2
101	TRUE	TRUE	Activation of the AP-1 family of transcription factors.R-HSA-450341	2
102	TRUE	TRUE	Antigen Presentation: Folding, assembly and peptide loading of class I MHC.R-HSA-983170	2
103	TRUE	TRUE	Deregulated CDK5 triggers multiple neurodegenerative pathways in Alzheimer's disease models.R-HSA-8862803	2
104	TRUE	TRUE	Degradation of GLI1 by the proteasome.R-HSA-5610780	2
105	TRUE	TRUE	Cytokine Signaling in Immune system.R-HSA-1280215	2
106	TRUE	TRUE	Formyl peptide receptors bind formyl peptides and many other ligands.R-HSA-444473	2
107	TRUE	TRUE	Competing endogenous RNAs (ceRNAs) regulate PTEN translation.R-HSA-8948700	2
108	TRUE	TRUE	Cohesin Loading onto Chromatin.R-HSA-2470946	2
109	TRUE	TRUE	Cilium Assembly.R-HSA-5617833	2
110	TRUE	TRUE	Cell-Cell communication.R-HSA-1500931	2
111	TRUE	TRUE	Assembly and cell surface presentation of NMDA receptors.R-HSA-9609736	2
112	TRUE	TRUE	Cargo trafficking to the periciliary membrane.R-HSA-5620920	2
113	TRUE	TRUE	BH3-only proteins associate with and inactivate anti-apoptotic BCL-2 members.R-HSA-111453	2
114	TRUE	TRUE	COPI-dependent Golgi-to-ER retrograde traffic.R-HSA-6811434	2
115	TRUE	TRUE	BMAL1:CLOCK,NPAS2 activates circadian gene expression.R-HSA-1368108	2
116	TRUE	TRUE	Biological oxidations.R-HSA-211859	2
117	TRUE	TRUE	Butyrate Response Factor 1 (BRF1) binds and destabilizes mRNA.R-HSA-450385	2
118	TRUE	TRUE	CD28 dependent Vav1 pathway.R-HSA-389359	2
119	TRUE	TRUE	CD209 (DC-SIGN) signaling.R-HSA-5621575	2
120	TRUE	TRUE	FOXO-mediated transcription of cell death genes.R-HSA-9614657	2
121	TRUE	TRUE	Establishment of Sister Chromatid Cohesion.R-HSA-2468052	2
122	TRUE	TRUE	InlB-mediated entry of Listeria monocytogenes into host cell.R-HSA-8875360	2
123	TRUE	TRUE	Glutamate Neurotransmitter Release Cycle.R-HSA-210500	2
124	TRUE	TRUE	HS-GAG biosynthesis.R-HSA-2022928	2
125	TRUE	TRUE	Inhibition of PKR.R-HSA-169131	2
126	TRUE	TRUE	Interferon Signaling.R-HSA-913531	2
127	TRUE	TRUE	Initial triggering of complement.R-HSA-166663	2
128	TRUE	TRUE	Insertion of tail-anchored proteins into the endoplasmic reticulum membrane.R-HSA-9609523	2
129	TRUE	TRUE	HIV Transcription Initiation.R-HSA-167161	2
130	FALSE	TRUE	PTK6 Regulates Cell Cycle.R-HSA-8849470	1
131	FALSE	TRUE	PTK6 Regulates Proteins Involved in RNA Processing.R-HSA-8849468	1
132	FALSE	TRUE	PTK6 promotes HIF1A stabilization.R-HSA-8857538	1
133	FALSE	TRUE	Regulation of RUNX2 expression and activity.R-HSA-8939902	1
134	FALSE	TRUE	Regulation of RAS by GAPs.R-HSA-5658442	1
135	FALSE	TRUE	RUNX1 regulates transcription of genes involved in differentiation of myeloid cells.R-HSA-8939246	1
136	FALSE	TRUE	Regulation of PAK-2p34 activity by PS-GAP-RHG10.R-HSA-211728	1
137	FALSE	TRUE	Regulation of TLR by endogenous ligand.R-HSA-5686938	1
138	FALSE	TRUE	Regulation of MECP2 expression and activity.R-HSA-9022692	1
139	FALSE	TRUE	Pausing and recovery of HIV elongation.R-HSA-167290	1
140	FALSE	TRUE	Regulation of KIT signaling.R-HSA-1433559	1
141	FALSE	TRUE	Regulation of FOXO transcriptional activity by acetylation.R-HSA-9617629	1
142	FALSE	TRUE	Pausing and recovery of Tat-mediated HIV elongation.R-HSA-167238	1
143	FALSE	TRUE	Phosphorylation of proteins involved in G1-S transition by active Cyclin E:Cdk2 complexes.R-HSA-69200	1
144	FALSE	TRUE	Plasma lipoprotein assembly, remodeling, and clearance.R-HSA-174824	1
145	FALSE	TRUE	Plasma lipoprotein clearance.R-HSA-8964043	1
146	FALSE	TRUE	Parasite infection.R-HSA-9664407	1
147	FALSE	TRUE	PTK6 Expression.R-HSA-8849473	1
148	FALSE	TRUE	Post-translational protein phosphorylation.R-HSA-8957275	1
149	FALSE	TRUE	PTK6 Down-Regulation.R-HSA-8849472	1
150	FALSE	TRUE	Oxygen-dependent proline hydroxylation of Hypoxia-inducible Factor Alpha.R-HSA-1234176	1
151	FALSE	TRUE	Regulation of actin dynamics for phagocytic cup formation.R-HSA-2029482	1
152	FALSE	TRUE	Regulation of TP53 Expression and Degradation.R-HSA-6806003	1
153	FALSE	TRUE	PCP-CE pathway.R-HSA-4086400	1
154	FALSE	TRUE	Regulation of TP53 Degradation.R-HSA-6804757	1
155	FALSE	TRUE	PI3K events in ERBB4 signaling.R-HSA-1250342	1
156	FALSE	TRUE	Regulation of TP53 Activity.R-HSA-5633007	1
157	FALSE	TRUE	Regulation of TP53 Activity through Methylation.R-HSA-6804760	1
158	FALSE	TRUE	PI3K-AKT Signaling in Cancer.R-HSA-2219528	1
159	FALSE	TRUE	Regulation of TP53 Activity through Acetylation.R-HSA-6804758	1
160	FALSE	TRUE	PI3K-AKT activation.R-HSA-198203	1
161	FALSE	TRUE	Regulation of TNFR1 signaling.R-HSA-5357905	1
162	FALSE	TRUE	PI5P Regulates TP53 Acetylation.R-HSA-6811555	1
163	FALSE	TRUE	PLC beta mediated events.R-HSA-112043	1
164	FALSE	TRUE	PLCG1 events in ERBB2 signaling.R-HSA-1251932	1
165	FALSE	TRUE	PPARA activates gene expression.R-HSA-1989781	1
166	FALSE	TRUE	PTK6 Activates STAT3.R-HSA-8849474	1
167	FALSE	TRUE	Post-translational protein modification.R-HSA-597592	1
168	FALSE	TRUE	Pre-NOTCH Transcription and Translation.R-HSA-1912408	1
169	FALSE	TRUE	Pre-NOTCH Expression and Processing.R-HSA-1912422	1
170	FALSE	TRUE	Pre-NOTCH Processing in Golgi.R-HSA-1912420	1
171	FALSE	TRUE	RUNX2 regulates bone development.R-HSA-8941326	1
172	FALSE	TRUE	RET signaling.R-HSA-8853659	1
173	FALSE	TRUE	RHO GTPase Effectors.R-HSA-195258	1
174	FALSE	TRUE	RHO GTPases Activate Formins.R-HSA-5663220	1
175	FALSE	TRUE	RHO GTPases Activate WASPs and WAVEs.R-HSA-5663213	1
176	FALSE	TRUE	RHO GTPases activate IQGAPs.R-HSA-5626467	1
177	FALSE	TRUE	RMTs methylate histone arginines.R-HSA-3214858	1
178	FALSE	TRUE	RNA Polymerase II Pre-transcription Events.R-HSA-674695	1
179	FALSE	TRUE	RNA Polymerase II Transcription Elongation.R-HSA-75955	1
180	FALSE	TRUE	RNA Polymerase II Transcription.R-HSA-73857	1
181	FALSE	TRUE	ROBO receptors bind AKAP5.R-HSA-9010642	1
182	FALSE	TRUE	RORA activates gene expression.R-HSA-1368082	1
183	FALSE	TRUE	RUNX1 interacts with co-factors whose precise effect on RUNX1 targets is not known.R-HSA-8939243	1
184	FALSE	TRUE	RUNX1 regulates transcription of genes involved in interleukin signaling.R-HSA-8939247	1
185	FALSE	TRUE	RUNX1 regulates estrogen receptor mediated transcription.R-HSA-8931987	1
186	FALSE	TRUE	RUNX1 regulates expression of components of tight junctions.R-HSA-8935964	1
187	FALSE	TRUE	RUNX1 regulates transcription of genes involved in BCR signaling.R-HSA-8939245	1
188	FALSE	TRUE	RAF-MAP kinase cascade.R-HSA-5673001	1
189	FALSE	TRUE	RAF activation.R-HSA-5673000	1
190	FALSE	TRUE	RUNX3 regulates CDKN1A transcription.R-HSA-8941855	1
191	FALSE	TRUE	Protein folding.R-HSA-391251	1
192	FALSE	TRUE	RUNX1 regulates transcription of genes involved in WNT signaling.R-HSA-8939256	1
193	FALSE	TRUE	Processing and activation of SUMO.R-HSA-3215018	1
194	FALSE	TRUE	Processing of Capped Intronless Pre-mRNA.R-HSA-75067	1
195	FALSE	TRUE	Processing of Intronless Pre-mRNAs.R-HSA-77595	1
196	FALSE	TRUE	Processing of SMDT1.R-HSA-8949664	1
197	FALSE	TRUE	Programmed Cell Death.R-HSA-5357801	1
198	FALSE	TRUE	Regulation of Complement cascade.R-HSA-977606	1
199	FALSE	TRUE	Recycling of eIF2:GDP.R-HSA-72731	1
200	FALSE	TRUE	Purinergic signaling in leishmaniasis infection.R-HSA-9660826	1
201	FALSE	TRUE	Protein repair.R-HSA-5676934	1
202	FALSE	TRUE	RUNX3 regulates p14-ARF.R-HSA-8951936	1
203	FALSE	TRUE	RUNX3 regulates RUNX1-mediated transcription.R-HSA-8951911	1
204	FALSE	TRUE	Protein-protein interactions at synapses.R-HSA-6794362	1
205	FALSE	TRUE	RUNX3 regulates NOTCH signaling.R-HSA-8941856	1
206	FALSE	TRUE	Other semaphorin interactions.R-HSA-416700	1
207	FALSE	TRUE	Proton-coupled neutral amino acid transporters.R-HSA-428559	1
208	FALSE	TRUE	Ovarian tumor domain proteases.R-HSA-5689896	1
209	FALSE	TRUE	Negative regulation of NMDA receptor-mediated neuronal transmission.R-HSA-9617324	1
210	FALSE	TRUE	Oncogenic MAPK signaling.R-HSA-6802957	1
211	FALSE	TRUE	MAPK family signaling cascades.R-HSA-5683057	1
212	FALSE	TRUE	LRR FLII-interacting protein 1 (LRRFIP1) activates type I IFN production.R-HSA-3134973	1
213	FALSE	TRUE	Laminin interactions.R-HSA-3000157	1
214	FALSE	TRUE	Late Phase of HIV Life Cycle.R-HSA-162599	1
215	FALSE	TRUE	Leishmania infection.R-HSA-9658195	1
216	FALSE	TRUE	Leishmania phagocytosis.R-HSA-9664417	1
217	FALSE	TRUE	Long-term potentiation.R-HSA-9620244	1
218	FALSE	TRUE	Lysosome Vesicle Biogenesis.R-HSA-432720	1
219	FALSE	TRUE	Lysosphingolipid and LPA receptors.R-HSA-419408	1
220	FALSE	TRUE	M Phase.R-HSA-68886	1
221	FALSE	TRUE	MAPK1 (ERK2) activation.R-HSA-112411	1
222	FALSE	TRUE	Oncogene Induced Senescence.R-HSA-2559585	1
223	FALSE	TRUE	MAPK1-MAPK3 signaling.R-HSA-5684996	1
224	FALSE	TRUE	MASTL Facilitates Mitotic Progression.R-HSA-2465910	1
225	FALSE	TRUE	MECP2 regulates neuronal receptors and channels.R-HSA-9022699	1
226	FALSE	TRUE	MET activates PI3K-AKT signaling.R-HSA-8851907	1
227	FALSE	TRUE	MET activates PTPN11.R-HSA-8865999	1
228	FALSE	TRUE	MET activates RAP1 and RAC1.R-HSA-8875555	1
229	FALSE	TRUE	MET activates RAS signaling.R-HSA-8851805	1
230	FALSE	TRUE	MET activates STAT3.R-HSA-8875791	1
231	FALSE	TRUE	MET interacts with TNS proteins.R-HSA-8875513	1
232	FALSE	TRUE	LGI-ADAM interactions.R-HSA-5682910	1
233	FALSE	TRUE	Killing mechanisms.R-HSA-9664420	1
234	FALSE	TRUE	Ion transport by P-type ATPases.R-HSA-936837	1
235	FALSE	TRUE	Ion channel transport.R-HSA-983712	1
236	FALSE	TRUE	Integration of viral DNA into host genomic DNA.R-HSA-175567	1
237	FALSE	TRUE	Integrin cell surface interactions.R-HSA-216083	1
238	FALSE	TRUE	Interaction between PHLDA1 and AURKA.R-HSA-8854521	1
239	FALSE	TRUE	Interactions of Rev with host cellular proteins.R-HSA-177243	1
240	FALSE	TRUE	Interactions of Tat with host cellular proteins.R-HSA-176034	1
241	FALSE	TRUE	Interactions of Vpr with host cellular proteins.R-HSA-176033	1
242	FALSE	TRUE	Interleukin-12 family signaling.R-HSA-447115	1
243	FALSE	TRUE	Interleukin-12 signaling.R-HSA-9020591	1
244	FALSE	TRUE	Interleukin-20 family signaling.R-HSA-8854691	1
245	FALSE	TRUE	Interleukin-21 signaling.R-HSA-9020958	1
246	FALSE	TRUE	Interleukin-27 signaling.R-HSA-9020956	1
247	FALSE	TRUE	Interleukin-37 signaling.R-HSA-9008059	1
248	FALSE	TRUE	Interleukin-6 family signaling.R-HSA-6783589	1
249	FALSE	TRUE	Interleukin-6 signaling.R-HSA-1059683	1
250	FALSE	TRUE	Intestinal absorption.R-HSA-8963676	1
251	FALSE	TRUE	Intestinal hexose absorption.R-HSA-8981373	1
252	FALSE	TRUE	Intra-Golgi and retrograde Golgi-to-ER traffic.R-HSA-6811442	1
253	FALSE	TRUE	Intrinsic Pathway for Apoptosis.R-HSA-109606	1
254	FALSE	TRUE	Invadopodia formation.R-HSA-8941237	1
255	FALSE	TRUE	MET receptor recycling.R-HSA-8875656	1
256	FALSE	TRUE	MHC class II antigen presentation.R-HSA-2132295	1
257	FALSE	TRUE	MTOR signalling.R-HSA-165159	1
258	FALSE	TRUE	NF-kB activation through FADD-RIP-1 pathway mediated by caspase-8 and -10.R-HSA-933543	1
259	FALSE	TRUE	NIK-->noncanonical NF-kB signaling.R-HSA-5676590	1
260	FALSE	TRUE	NOSTRIN mediated eNOS trafficking.R-HSA-203641	1
261	FALSE	TRUE	NOTCH3 Intracellular Domain Regulates Transcription.R-HSA-9013508	1
262	FALSE	TRUE	NS1 Mediated Effects on Host Pathways.R-HSA-168276	1
263	FALSE	TRUE	Neddylation.R-HSA-8951664	1
264	FALSE	TRUE	Nef mediated downregulation of MHC class I complex cell surface expression.R-HSA-164940	1
265	FALSE	TRUE	Nef-mediates down modulation of cell surface receptors by recruiting them to clathrin adapters.R-HSA-164938	1
266	FALSE	TRUE	Negative feedback regulation of MAPK pathway.R-HSA-5674499	1
267	FALSE	TRUE	Negative regulation of MAPK pathway.R-HSA-5675221	1
268	FALSE	TRUE	Regulation of cytoskeletal remodeling and cell spreading by IPP complex components.R-HSA-446388	1
269	FALSE	TRUE	Nervous system development.R-HSA-9675108	1
270	FALSE	TRUE	Neurexins and neuroligins.R-HSA-6794361	1
271	FALSE	TRUE	Neurophilin interactions with VEGF and VEGFR.R-HSA-194306	1
272	FALSE	TRUE	Neutrophil degranulation.R-HSA-6798695	1
273	FALSE	TRUE	Non-integrin membrane-ECM interactions.R-HSA-3000171	1
274	FALSE	TRUE	Notch-HLH transcription pathway.R-HSA-350054	1
275	FALSE	TRUE	Nuclear Pore Complex (NPC) Disassembly.R-HSA-3301854	1
276	FALSE	TRUE	Nuclear import of Rev protein.R-HSA-180746	1
277	FALSE	TRUE	Nucleotide-binding domain, leucine rich repeat containing receptor (NLR) signaling pathways.R-HSA-168643	1
278	FALSE	TRUE	NGF-independant TRKA activation.R-HSA-187024	1
279	FALSE	TRUE	NEP-NS2 Interacts with the Cellular Export Machinery.R-HSA-168333	1
280	FALSE	TRUE	Macroautophagy.R-HSA-1632852	1
281	FALSE	TRUE	NCAM1 interactions.R-HSA-419037	1
282	FALSE	TRUE	Membrane Trafficking.R-HSA-199991	1
283	FALSE	TRUE	Metabolism of fat-soluble vitamins.R-HSA-6806667	1
284	FALSE	TRUE	Metabolism of vitamins and cofactors.R-HSA-196854	1
285	FALSE	TRUE	Microtubule-dependent trafficking of connexons from Golgi to the plasma membrane.R-HSA-190840	1
286	FALSE	TRUE	Miscellaneous transport and binding events.R-HSA-5223345	1
287	FALSE	TRUE	Mismatch repair (MMR) directed by MSH2:MSH3 (MutSbeta).R-HSA-5358606	1
288	FALSE	TRUE	Mitochondrial calcium ion transport.R-HSA-8949215	1
289	FALSE	TRUE	Mitochondrial iron-sulfur cluster biogenesis.R-HSA-1362409	1
290	FALSE	TRUE	Mitochondrial protein import.R-HSA-1268020	1
291	FALSE	TRUE	Mitotic Anaphase.R-HSA-68882	1
292	FALSE	TRUE	Mitotic G2-G2-M phases.R-HSA-453274	1
293	FALSE	TRUE	Mitotic Metaphase and Anaphase.R-HSA-2555396	1
294	FALSE	TRUE	Mitotic Prometaphase.R-HSA-68877	1
295	FALSE	TRUE	Mitotic Spindle Checkpoint.R-HSA-69618	1
296	FALSE	TRUE	Molybdenum cofactor biosynthesis.R-HSA-947581	1
297	FALSE	TRUE	MyD88-independent TLR4 cascade .R-HSA-166166	1
298	FALSE	TRUE	MyD88:MAL(TIRAP) cascade initiated on plasma membrane.R-HSA-166058	1
299	FALSE	TRUE	NADPH regeneration.R-HSA-389542	1
300	FALSE	TRUE	NCAM signaling for neurite out-growth.R-HSA-375165	1
301	FALSE	TRUE	Regulation of cortical dendrite branching.R-HSA-8985801	1
302	FALSE	TRUE	SLIT2:ROBO1 increases RHOA activity.R-HSA-8985586	1
303	FALSE	TRUE	Regulation of gene expression by Hypoxia-inducible Factor.R-HSA-1234158	1
304	FALSE	TRUE	TCR signaling.R-HSA-202403	1
305	FALSE	TRUE	Syndecan interactions.R-HSA-3000170	1
306	FALSE	TRUE	Synthesis of PIPs at the Golgi membrane.R-HSA-1660514	1
307	FALSE	TRUE	Transport of the SLBP independent Mature mRNA.R-HSA-159227	1
308	FALSE	TRUE	Transport of the SLBP Dependant Mature mRNA.R-HSA-159230	1
309	FALSE	TRUE	Synthesis of Prostaglandins (PG) and Thromboxanes (TX).R-HSA-2162123	1
310	FALSE	TRUE	Transport of small molecules.R-HSA-382551	1
311	FALSE	TRUE	TAK1 activates NFkB by phosphorylation and activation of IKKs complex.R-HSA-445989	1
312	FALSE	TRUE	TCF dependent signaling in response to WNT.R-HSA-201681	1
313	FALSE	TRUE	TFAP2 (AP-2) family regulates transcription of cell cycle factors.R-HSA-8866911	1
314	FALSE	TRUE	Suppression of apoptosis.R-HSA-9635465	1
315	FALSE	TRUE	Transport of connexins along the secretory pathway.R-HSA-190827	1
316	FALSE	TRUE	TFAP2 (AP-2) family regulates transcription of growth factors and their receptors.R-HSA-8866910	1
317	FALSE	TRUE	Transport of Ribonucleoproteins into the Host Nucleus.R-HSA-168271	1
318	FALSE	TRUE	Transport of Mature mRNAs Derived from Intronless Transcripts.R-HSA-159234	1
319	FALSE	TRUE	Transport of Mature mRNA Derived from an Intronless Transcript.R-HSA-159231	1
320	FALSE	TRUE	TGF-beta receptor signaling activates SMADs.R-HSA-2173789	1
321	FALSE	TRUE	TGF-beta receptor signaling in EMT (epithelial to mesenchymal transition).R-HSA-2173791	1
322	FALSE	TRUE	Translation initiation complex formation.R-HSA-72649	1
323	FALSE	TRUE	Suppression of phagosomal maturation.R-HSA-9637687	1
324	FALSE	TRUE	Transport to the Golgi and subsequent modification.R-HSA-948021	1
325	FALSE	TRUE	Regulation of innate immune responses to cytosolic DNA.R-HSA-3134975	1
326	FALSE	TRUE	Stimulation of the cell death response by PAK-2p34.R-HSA-211736	1
327	FALSE	TRUE	Signalling to RAS.R-HSA-167044	1
328	FALSE	TRUE	Signalling to p38 via RIT and RIN.R-HSA-187706	1
329	FALSE	TRUE	Sodium-coupled sulphate, di- and tri-carboxylate transporters.R-HSA-433137	1
330	FALSE	TRUE	Viral Messenger RNA Synthesis.R-HSA-168325	1
331	FALSE	TRUE	Vesicle-mediated transport.R-HSA-5653656	1
332	FALSE	TRUE	VLDLR internalisation and degradation.R-HSA-8866427	1
333	FALSE	TRUE	Spry regulation of FGF signaling.R-HSA-1295596	1
334	FALSE	TRUE	Stabilization of p53.R-HSA-69541	1
335	FALSE	TRUE	VEGFR2 mediated cell proliferation.R-HSA-5218921	1
336	FALSE	TRUE	Tristetraprolin (TTP, ZFP36) binds and destabilizes mRNA.R-HSA-450513	1
337	FALSE	TRUE	Stimuli-sensing channels.R-HSA-2672351	1
338	FALSE	TRUE	Sulfur amino acid metabolism.R-HSA-1614635	1
339	FALSE	TRUE	Uptake and function of diphtheria toxin.R-HSA-5336415	1
340	FALSE	TRUE	Uptake and function of anthrax toxins.R-HSA-5210891	1
341	FALSE	TRUE	Uptake and actions of bacterial toxins.R-HSA-5339562	1
342	FALSE	TRUE	Unfolded Protein Response (UPR).R-HSA-381119	1
343	FALSE	TRUE	Ubiquitin-dependent degradation of Cyclin D.R-HSA-75815	1
344	FALSE	TRUE	Ub-specific processing proteases.R-HSA-5689880	1
345	FALSE	TRUE	Transcriptional regulation of pluripotent stem cells.R-HSA-452723	1
346	FALSE	TRUE	TNF receptor superfamily (TNFSF) members mediating non-canonical NF-kB pathway.R-HSA-5676594	1
347	FALSE	TRUE	Transcriptional regulation of granulopoiesis.R-HSA-9616222	1
348	FALSE	TRUE	Tat-mediated elongation of the HIV-1 transcript.R-HSA-167246	1
349	FALSE	TRUE	TRIF(TICAM1)-mediated TLR4 signaling .R-HSA-937061	1
350	FALSE	TRUE	Toxicity of botulinum toxin type C (BoNT-C).R-HSA-5250971	1
351	FALSE	TRUE	Toll-like Receptor Cascades.R-HSA-168898	1
352	FALSE	TRUE	Toll Like Receptor TLR6:TLR2 Cascade.R-HSA-168188	1
353	FALSE	TRUE	TRIF-mediated programmed cell death.R-HSA-2562578	1
354	FALSE	TRUE	TRKA activation by NGF.R-HSA-187042	1
355	FALSE	TRUE	TYSND1 cleaves peroxisomal proteins.R-HSA-9033500	1
356	FALSE	TRUE	Tat-mediated HIV elongation arrest and recovery.R-HSA-167243	1
357	FALSE	TRUE	Termination of translesion DNA synthesis.R-HSA-5656169	1
358	FALSE	TRUE	TNF signaling.R-HSA-75893	1
359	FALSE	TRUE	The NLRP1 inflammasome.R-HSA-844455	1
360	FALSE	TRUE	The activation of arylsulfatases.R-HSA-1663150	1
361	FALSE	TRUE	The role of Nef in HIV-1 replication and disease pathogenesis.R-HSA-164952	1
362	FALSE	TRUE	Toll Like Receptor TLR1:TLR2 Cascade.R-HSA-168179	1
363	FALSE	TRUE	Thrombin signalling through proteinase activated receptors (PARs).R-HSA-456926	1
364	FALSE	TRUE	Toll Like Receptor 4 (TLR4) Cascade.R-HSA-166016	1
365	FALSE	TRUE	Tight junction interactions.R-HSA-420029	1
366	FALSE	TRUE	Toll Like Receptor 2 (TLR2) Cascade.R-HSA-181438	1
367	FALSE	TRUE	Transcription of the HIV genome.R-HSA-167172	1
368	FALSE	TRUE	TRAF6-mediated induction of TAK1 complex within TLR4 complex.R-HSA-937072	1
369	FALSE	TRUE	TRAF6 mediated NF-kB activation.R-HSA-933542	1
370	FALSE	TRUE	TRAF6 mediated IRF7 activation.R-HSA-933541	1
371	FALSE	TRUE	TNFR1-induced NFkappaB signaling pathway.R-HSA-5357956	1
372	FALSE	TRUE	TNFR2 non-canonical NF-kB pathway.R-HSA-5668541	1
373	FALSE	TRUE	TNFs bind their physiological receptors.R-HSA-5669034	1
374	FALSE	TRUE	Transcriptional regulation by the AP-2 (TFAP2) family of transcription factors.R-HSA-8864260	1
375	FALSE	TRUE	TP53 Regulates Metabolic Genes.R-HSA-5628897	1
376	FALSE	TRUE	Transcriptional regulation by RUNX3.R-HSA-8878159	1
377	FALSE	TRUE	Transcriptional regulation by RUNX1.R-HSA-8878171	1
378	FALSE	TRUE	TP53 Regulates Transcription of Cell Cycle Genes.R-HSA-6791312	1
379	FALSE	TRUE	TP53 Regulates Transcription of Cell Death Genes.R-HSA-5633008	1
380	FALSE	TRUE	Transcriptional activity of SMAD2-SMAD3:SMAD4 heterotrimer.R-HSA-2173793	1
381	FALSE	TRUE	TP53 Regulates Transcription of Genes Involved in G1 Cell Cycle Arrest.R-HSA-6804116	1
382	FALSE	TRUE	TP53 Regulates Transcription of Genes Involved in G2 Cell Cycle Arrest.R-HSA-6804114	1
383	FALSE	TRUE	TP53 regulates transcription of additional cell cycle genes whose exact role in the p53 pathway remain uncertain.R-HSA-6804115	1
384	FALSE	TRUE	TRAF3-dependent IRF activation pathway.R-HSA-918233	1
385	FALSE	TRUE	Transcriptional Regulation by VENTX.R-HSA-8853884	1
386	FALSE	TRUE	Transcriptional Regulation by TP53.R-HSA-3700989	1
387	FALSE	TRUE	Transcriptional Regulation by MECP2.R-HSA-8986944	1
388	FALSE	TRUE	Signalling to ERK5.R-HSA-198765	1
389	FALSE	TRUE	Signaling by the B Cell Receptor (BCR).R-HSA-983705	1
390	FALSE	TRUE	Virus Assembly and Release.R-HSA-168268	1
391	FALSE	TRUE	SUMOylation.R-HSA-2990846	1
392	FALSE	TRUE	SUMO E3 ligases SUMOylate target proteins.R-HSA-3108232	1
393	FALSE	TRUE	SUMO is conjugated to E1 (UBA2:SAE1).R-HSA-3065676	1
394	FALSE	TRUE	SUMO is proteolytically processed.R-HSA-3065679	1
395	FALSE	TRUE	SUMOylation of DNA replication proteins.R-HSA-4615885	1
396	FALSE	TRUE	SUMOylation of chromatin organization proteins.R-HSA-4551638	1
397	FALSE	TRUE	SUMOylation of transcription cofactors.R-HSA-3899300	1
398	FALSE	TRUE	SUMOylation of transcription factors.R-HSA-3232118	1
399	FALSE	TRUE	SUMOylation of ubiquitinylation proteins.R-HSA-3232142	1
400	FALSE	TRUE	Scavenging by Class A Receptors.R-HSA-3000480	1
401	FALSE	TRUE	Signaling by EGFR.R-HSA-177929	1
402	FALSE	TRUE	Sema3A PAK dependent Axon repulsion.R-HSA-399954	1
403	FALSE	TRUE	Semaphorin interactions.R-HSA-373755	1
404	FALSE	TRUE	Separation of Sister Chromatids.R-HSA-2467813	1
405	FALSE	TRUE	Signal Transduction.R-HSA-162582	1
406	FALSE	TRUE	Signal attenuation.R-HSA-74749	1
407	FALSE	TRUE	Signal regulatory protein family interactions.R-HSA-391160	1
408	FALSE	TRUE	Signal transduction by L1.R-HSA-445144	1
409	FALSE	TRUE	Signaling by BRAF and RAF fusions.R-HSA-6802952	1
410	FALSE	TRUE	STING mediated induction of host immune responses.R-HSA-1834941	1
411	FALSE	TRUE	STAT6-mediated induction of chemokines.R-HSA-3249367	1
412	FALSE	TRUE	STAT5 Activation.R-HSA-9645135	1
413	FALSE	TRUE	SOS-mediated signalling.R-HSA-112412	1
414	FALSE	TRUE	Regulation of insulin secretion.R-HSA-422356	1
415	FALSE	TRUE	Regulation of lipid metabolism by PPARalpha.R-HSA-400206	1
416	FALSE	TRUE	Regulation of ornithine decarboxylase (ODC).R-HSA-350562	1
417	FALSE	TRUE	Regulation of signaling by CBL.R-HSA-912631	1
418	FALSE	TRUE	Removal of aminoterminal propeptides from gamma-carboxylated proteins.R-HSA-159782	1
419	FALSE	TRUE	Resolution of Sister Chromatid Cohesion.R-HSA-2500257	1
420	FALSE	TRUE	Response of Mtb to phagocytosis.R-HSA-9637690	1
421	FALSE	TRUE	Response to elevated platelet cytosolic Ca2+.R-HSA-76005	1
422	FALSE	TRUE	Retinoid metabolism and transport.R-HSA-975634	1
423	FALSE	TRUE	Retrograde neurotrophin signalling.R-HSA-177504	1
424	FALSE	TRUE	Retrograde transport at the Trans-Golgi-Network.R-HSA-6811440	1
425	FALSE	TRUE	Ribosomal scanning and start codon recognition.R-HSA-72702	1
426	FALSE	TRUE	Role of ABL in ROBO-SLIT signaling.R-HSA-428890	1
427	FALSE	TRUE	Role of LAT2-NTAL-LAB on calcium mobilization.R-HSA-2730905	1
428	FALSE	TRUE	SHC1 events in EGFR signaling.R-HSA-180336	1
429	FALSE	TRUE	SHC1 events in ERBB2 signaling.R-HSA-1250196	1
430	FALSE	TRUE	SHC1 events in ERBB4 signaling.R-HSA-1250347	1
431	FALSE	TRUE	Signaling by EGFR in Cancer.R-HSA-1643713	1
432	FALSE	TRUE	trans-Golgi Network Vesicle Budding.R-HSA-199992	1
433	FALSE	TRUE	Visual phototransduction.R-HSA-2187338	1
434	FALSE	TRUE	Signaling by Receptor Tyrosine Kinases.R-HSA-9006934	1
435	FALSE	TRUE	Signaling by NOTCH3.R-HSA-9012852	1
436	FALSE	TRUE	Signaling by NTRKs.R-HSA-166520	1
437	FALSE	TRUE	Signaling by Non-Receptor Tyrosine Kinases.R-HSA-9006927	1
438	FALSE	TRUE	Signaling by Nuclear Receptors.R-HSA-9006931	1
439	FALSE	TRUE	Signaling by Overexpressed Wild-Type EGFR in Cancer.R-HSA-5638302	1
440	FALSE	TRUE	Signaling by PDGF.R-HSA-186797	1
441	FALSE	TRUE	XAV939 inhibits tankyrase, stabilizing AXIN.R-HSA-5545619	1
442	FALSE	TRUE	Signaling by PTK6.R-HSA-8848021	1
443	FALSE	TRUE	WNT5A-dependent internalization of FZD4.R-HSA-5099900	1
444	FALSE	TRUE	Signaling by EGFRvIII in Cancer.R-HSA-5637812	1
445	FALSE	TRUE	WNT5A-dependent internalization of FZD2, FZD5 and ROR2.R-HSA-5140745	1
446	FALSE	TRUE	WNT5:FZD7-mediated leishmania damping.R-HSA-9673324	1
447	FALSE	TRUE	Signaling by Rho GTPases.R-HSA-194315	1
448	FALSE	TRUE	Signaling by TGF-beta Receptor Complex.R-HSA-170834	1
449	FALSE	TRUE	Vpr-mediated nuclear import of PICs.R-HSA-180910	1
450	FALSE	TRUE	Signaling by WNT.R-HSA-195721	1
451	FALSE	TRUE	Signaling by cytosolic FGFR1 fusion mutants.R-HSA-1839117	1
452	FALSE	TRUE	Signaling by plasma membrane FGFR1 fusions.R-HSA-8853336	1
453	FALSE	TRUE	Signaling by NOTCH2.R-HSA-1980145	1
454	FALSE	TRUE	Signaling by NOTCH1 t(7
455	FALSE	TRUE	Signaling by MET.R-HSA-6806834	1
456	FALSE	TRUE	Signaling by Ligand-Responsive EGFR Variants in Cancer.R-HSA-5637815	1
457	FALSE	TRUE	Signaling by ERBB2 ECD mutants.R-HSA-9665348	1
458	FALSE	TRUE	Signaling by ERBB2 KD Mutants.R-HSA-9664565	1
459	FALSE	TRUE	rRNA modification in the nucleus and cytosol.R-HSA-6790901	1
460	FALSE	TRUE	p75NTR negatively regulates cell cycle via SC1.R-HSA-193670	1
461	FALSE	TRUE	Signaling by ERBB2 TMD-JMD mutants.R-HSA-9665686	1
462	FALSE	TRUE	Signaling by ERBB2 in Cancer.R-HSA-1227990	1
463	FALSE	TRUE	Signaling by ERBB2.R-HSA-1227986	1
464	FALSE	TRUE	p38MAPK events.R-HSA-171007	1
465	FALSE	TRUE	Signaling by ERBB4.R-HSA-1236394	1
466	FALSE	TRUE	mTORC1-mediated signalling.R-HSA-166208	1
467	FALSE	TRUE	Signaling by Erythropoietin.R-HSA-9006335	1
468	FALSE	TRUE	Signaling by FGFR1 amplification mutants.R-HSA-1839120	1
469	FALSE	TRUE	XBP1(S) activates chaperone genes.R-HSA-381038	1
470	FALSE	TRUE	Insulin receptor signalling cascade.R-HSA-74751	1
471	FALSE	TRUE	Signaling by Hedgehog.R-HSA-5358351	1
472	FALSE	TRUE	Signaling by Interleukins.R-HSA-449147	1
473	FALSE	TRUE	Signaling by Leptin.R-HSA-2586552	1
474	FALSE	TRUE	Integration of provirus.R-HSA-162592	1
475	FALSE	TRUE	FLT3 Signaling.R-HSA-9607240	1
476	FALSE	TRUE	Insulin receptor recycling.R-HSA-77387	1
477	TRUE	FALSE	TP53 Regulates Transcription of DNA Repair Genes.R-HSA-6796648	1
478	TRUE	FALSE	Synthesis of PIPs at the early endosome membrane.R-HSA-1660516	1
479	TRUE	FALSE	Synthesis of PIPs at the late endosome membrane.R-HSA-1660517	1
480	TRUE	FALSE	Synthesis of diphthamide-EEF2.R-HSA-5358493	1
481	TRUE	FALSE	Synthesis, secretion, and deacylation of Ghrelin.R-HSA-422085	1
482	TRUE	FALSE	TBC-RABGAPs.R-HSA-8854214	1
483	TRUE	FALSE	TICAM1,TRAF6-dependent induction of TAK1 complex.R-HSA-9014325	1
484	TRUE	FALSE	TLR3-mediated TICAM1-dependent programmed cell death.R-HSA-9013957	1
485	TRUE	FALSE	TNFR1-induced proapoptotic signaling.R-HSA-5357786	1
486	TRUE	FALSE	Telomere C-strand (Lagging Strand) Synthesis.R-HSA-174417	1
487	TRUE	FALSE	Synthesis of Leukotrienes (LT) and Eoxins (EX).R-HSA-2142691	1
488	TRUE	FALSE	Terminal pathway of complement.R-HSA-166665	1
489	TRUE	FALSE	Tie2 Signaling.R-HSA-210993	1
490	TRUE	FALSE	Translocation of SLC2A4 (GLUT4) to the plasma membrane.R-HSA-1445148	1
491	TRUE	FALSE	Translocation of ZAP-70 to Immunological synapse.R-HSA-202430	1
492	TRUE	FALSE	Transport of fatty acids.R-HSA-804914	1
493	TRUE	FALSE	Vif-mediated degradation of APOBEC3G.R-HSA-180585	1
494	TRUE	FALSE	Vitamin C (ascorbate) metabolism.R-HSA-196836	1
495	TRUE	FALSE	Xenobiotics.R-HSA-211981	1
496	TRUE	FALSE	Synthesis of Lipoxins (LX).R-HSA-2142700	1
497	TRUE	FALSE	Synthesis And Processing Of GAG, GAGPOL Polyproteins.R-HSA-174495	1
498	TRUE	FALSE	RHO GTPases Activate Rhotekin and Rhophilins.R-HSA-5666185	1
499	TRUE	FALSE	Response of EIF2AK4 (GCN2) to amino acid deficiency.R-HSA-9633012	1
500	TRUE	FALSE	RIPK1-mediated regulated necrosis.R-HSA-5213460	1
501	TRUE	FALSE	Regulated Necrosis.R-HSA-5218859	1
502	TRUE	FALSE	Regulation of Apoptosis.R-HSA-169911	1
503	TRUE	FALSE	Regulation of IFNG signaling.R-HSA-877312	1
504	TRUE	FALSE	Regulation of PTEN gene transcription.R-HSA-8943724	1
505	TRUE	FALSE	Regulation of PTEN localization.R-HSA-8948747	1
506	TRUE	FALSE	Regulation of activated PAK-2p34 by proteasome mediated degradation.R-HSA-211733	1
507	TRUE	FALSE	Relaxin receptors.R-HSA-444821	1
508	TRUE	FALSE	Response to metal ions.R-HSA-5660526	1
509	TRUE	FALSE	Striated Muscle Contraction.R-HSA-390522	1
510	TRUE	FALSE	Retinoid cycle disease events.R-HSA-2453864	1
511	TRUE	FALSE	Selective autophagy.R-HSA-9663891	1
512	TRUE	FALSE	Serotonin Neurotransmitter Release Cycle.R-HSA-181429	1
513	TRUE	FALSE	Signaling by Activin.R-HSA-1502540	1
514	TRUE	FALSE	Signaling by MST1.R-HSA-8852405	1
515	TRUE	FALSE	Signaling by NTRK3 (TRKC).R-HSA-9034015	1
516	TRUE	FALSE	Small interfering RNA (siRNA) biogenesis.R-HSA-426486	1
517	TRUE	FALSE	Smooth Muscle Contraction.R-HSA-445355	1
518	TRUE	FALSE	mRNA Editing: C to U Conversion.R-HSA-72200	1
519	TRUE	FALSE	phospho-PLA2 pathway.R-HSA-111995	1
520	FALSE	TRUE	2-LTR circle formation.R-HSA-164843	1
521	FALSE	TRUE	Antiviral mechanism by IFN-stimulated genes.R-HSA-1169410	1
522	FALSE	TRUE	Activation of the mRNA upon binding of the cap-binding complex and eIFs, and subsequent binding to 43S.R-HSA-72662	1
523	FALSE	TRUE	Adaptive Immune System.R-HSA-1280218	1
524	FALSE	TRUE	Advanced glycosylation endproduct receptor signaling.R-HSA-879415	1
525	FALSE	TRUE	Amino acids regulate mTORC1.R-HSA-9639288	1
526	FALSE	TRUE	Amplification of signal from unattached kinetochores via a MAD2 inhibitory signal.R-HSA-141444	1
527	FALSE	TRUE	Amplification of signal from the kinetochores.R-HSA-141424	1
528	FALSE	TRUE	Antigen processing-Cross presentation.R-HSA-1236975	1
529	FALSE	TRUE	Antigen processing: Ubiquitination & Proteasome degradation.R-HSA-983168	1
530	FALSE	TRUE	Apoptosis induced DNA fragmentation.R-HSA-140342	1
531	FALSE	TRUE	APOBEC3G mediated resistance to HIV-1 infection.R-HSA-180689	1
532	FALSE	TRUE	Apoptosis.R-HSA-109581	1
533	FALSE	TRUE	Arachidonic acid metabolism.R-HSA-2142753	1
534	FALSE	TRUE	Asparagine N-linked glycosylation.R-HSA-446203	1
535	FALSE	TRUE	Assembly of Viral Components at the Budding Site.R-HSA-168316	1
536	FALSE	TRUE	Assembly of active LPL and LIPC lipase complexes.R-HSA-8963889	1
537	FALSE	TRUE	Assembly of the ORC complex at the origin of replication.R-HSA-68616	1
538	FALSE	TRUE	Association of TriC-CCT with target proteins during biosynthesis.R-HSA-390471	1
539	FALSE	TRUE	Asymmetric localization of PCP proteins.R-HSA-4608870	1
540	FALSE	TRUE	Activation of the TFAP2 (AP-2) family of transcription factors.R-HSA-8866907	1
541	FALSE	TRUE	Activation of TRKA receptors.R-HSA-187015	1
542	FALSE	TRUE	Activation of SMO.R-HSA-5635838	1
543	FALSE	TRUE	Activation of Na-permeable kainate receptors.R-HSA-451307	1
544	FALSE	TRUE	ARL13B-mediated ciliary trafficking of INPP5E.R-HSA-5624958	1
545	FALSE	TRUE	ARMS-mediated activation.R-HSA-170984	1
546	FALSE	TRUE	ATF6 (ATF6-alpha) activates chaperone genes.R-HSA-381183	1
547	FALSE	TRUE	ATF6 (ATF6-alpha) activates chaperones.R-HSA-381033	1
548	FALSE	TRUE	Abortive elongation of HIV-1 transcript in the absence of Tat.R-HSA-167242	1
549	FALSE	TRUE	Activated NTRK2 signals through FYN.R-HSA-9032500	1
550	FALSE	TRUE	Activated NTRK2 signals through PI3K.R-HSA-9028335	1
551	FALSE	TRUE	Activated NTRK2 signals through RAS.R-HSA-9026519	1
552	FALSE	TRUE	Activated NTRK3 signals through RAS.R-HSA-9034864	1
553	FALSE	TRUE	Activation of BAD and translocation to mitochondria .R-HSA-111447	1
554	FALSE	TRUE	Activation of BH3-only proteins.R-HSA-114452	1
555	FALSE	TRUE	Activation of BIM and translocation to mitochondria .R-HSA-111446	1
556	FALSE	TRUE	Activation of BMF and translocation to mitochondria.R-HSA-139910	1
557	FALSE	TRUE	Activation of IRF3-IRF7 mediated by TBK1-IKK epsilon.R-HSA-936964	1
558	FALSE	TRUE	Activation of Matrix Metalloproteinases.R-HSA-1592389	1
559	FALSE	TRUE	Activation of NF-kappaB in B cells.R-HSA-1169091	1
560	FALSE	TRUE	Activation of NMDA receptors and postsynaptic events.R-HSA-442755	1
561	TRUE	FALSE	RHO GTPases regulate CFTR trafficking.R-HSA-5627083	1
562	TRUE	FALSE	RAB geranylgeranylation.R-HSA-8873719	1
563	FALSE	TRUE	Innate Immune System.R-HSA-168249	1
564	TRUE	FALSE	ER Quality Control Compartment (ERQC).R-HSA-901032	1
565	TRUE	FALSE	Dimerization of procaspase-8.R-HSA-69416	1
566	TRUE	FALSE	Diseases associated with the TLR signaling cascade.R-HSA-5602358	1
567	TRUE	FALSE	Diseases associated with visual transduction.R-HSA-2474795	1
568	TRUE	FALSE	Diseases of Immune System.R-HSA-5260271	1
569	TRUE	FALSE	Diseases of the neuronal system.R-HSA-9675143	1
570	TRUE	FALSE	Disinhibition of SNARE formation.R-HSA-114516	1
571	TRUE	FALSE	Dopamine Neurotransmitter Release Cycle.R-HSA-212676	1
572	TRUE	FALSE	EPHA-mediated growth cone collapse.R-HSA-3928663	1
573	TRUE	FALSE	Endogenous sterols.R-HSA-211976	1
574	TRUE	FALSE	Cytochrome P450 - arranged by substrate type.R-HSA-211897	1
575	TRUE	FALSE	Estrogen-stimulated signaling through PRKCZ.R-HSA-9634635	1
576	TRUE	FALSE	Events associated with phagocytolytic activity of PMN cells.R-HSA-8941413	1
577	TRUE	FALSE	Extension of Telomeres.R-HSA-180786	1
578	TRUE	FALSE	FasL- CD95L signaling.R-HSA-75157	1
579	TRUE	FALSE	Fertilization.R-HSA-1187000	1
580	TRUE	FALSE	Formation of the Editosome.R-HSA-75094	1
581	TRUE	FALSE	Formation of the cornified envelope.R-HSA-6809371	1
582	TRUE	FALSE	GP1b-IX-V activation signalling.R-HSA-430116	1
583	TRUE	FALSE	DCC mediated attractive signaling.R-HSA-418885	1
584	TRUE	FALSE	Chemokine receptors bind chemokines.R-HSA-380108	1
585	TRUE	FALSE	Prevention of phagosomal-lysosomal fusion.R-HSA-9636383	1
586	TRUE	FALSE	CASP8 activity is inhibited.R-HSA-5218900	1
587	TRUE	FALSE	Activation of C3 and C5.R-HSA-174577	1
588	TRUE	FALSE	Adherens junctions interactions.R-HSA-418990	1
589	TRUE	FALSE	Alternative complement activation.R-HSA-173736	1
590	TRUE	FALSE	Antimicrobial peptides.R-HSA-6803157	1
591	TRUE	FALSE	Aryl hydrocarbon receptor signalling.R-HSA-8937144	1
592	TRUE	FALSE	Assembly Of The HIV Virion.R-HSA-175474	1
593	TRUE	FALSE	Autodegradation of the E3 ubiquitin ligase COP1.R-HSA-349425	1
594	TRUE	FALSE	Biosynthesis of A2E, implicated in retinal degradation.R-HSA-2466712	1
595	TRUE	FALSE	CD28 co-stimulation.R-HSA-389356	1
596	TRUE	FALSE	Cell-extracellular matrix interactions.R-HSA-446353	1
597	TRUE	FALSE	CD28 dependent PI3K-Akt signaling.R-HSA-389357	1
598	TRUE	FALSE	CHL1 interactions.R-HSA-447041	1
599	TRUE	FALSE	CLEC7A-inflammasome pathway.R-HSA-5660668	1
600	TRUE	FALSE	CREB phosphorylation.R-HSA-199920	1
601	TRUE	FALSE	CREB3 factors activate genes.R-HSA-8874211	1
602	TRUE	FALSE	Cardiac conduction.R-HSA-5576891	1
603	TRUE	FALSE	Cell junction organization.R-HSA-446728	1
604	TRUE	FALSE	Cell-cell junction organization.R-HSA-421270	1
605	TRUE	FALSE	GPVI-mediated activation cascade.R-HSA-114604	1
606	TRUE	FALSE	Gene Silencing by RNA.R-HSA-211000	1
607	TRUE	FALSE	Hedgehog 'off' state.R-HSA-5610787	1
608	TRUE	FALSE	O-linked glycosylation of mucins.R-HSA-913709	1
609	TRUE	FALSE	Mtb iron assimilation by chelation.R-HSA-1222449	1
610	TRUE	FALSE	Muscle contraction.R-HSA-397014	1
611	TRUE	FALSE	NGF-stimulated transcription.R-HSA-9031628	1
612	TRUE	FALSE	NR1H2 & NR1H3 regulate gene expression to limit cholesterol uptake .R-HSA-9031525	1
613	TRUE	FALSE	NRIF signals cell death from the nucleus.R-HSA-205043	1
614	TRUE	FALSE	Nephrin family interactions.R-HSA-373753	1
615	TRUE	FALSE	Neurofascin interactions.R-HSA-447043	1
616	TRUE	FALSE	O-glycosylation of TSR domain-containing proteins.R-HSA-5173214	1
617	TRUE	FALSE	O-linked glycosylation.R-HSA-5173105	1
618	TRUE	FALSE	Heme biosynthesis.R-HSA-189451	1
619	TRUE	FALSE	Organic anion transport.R-HSA-561048	1
620	TRUE	FALSE	PERK regulates gene expression.R-HSA-381042	1
621	TRUE	FALSE	PIWI-interacting RNA (piRNA) biogenesis.R-HSA-5601884	1
622	TRUE	FALSE	Peptide hormone metabolism.R-HSA-2980736	1
623	TRUE	FALSE	Phase I - Functionalization of compounds.R-HSA-211945	1
624	TRUE	FALSE	Platelet Adhesion to exposed collagen.R-HSA-75892	1
625	TRUE	FALSE	Polymerase switching on the C-strand of the telomere.R-HSA-174411	1
626	TRUE	FALSE	Polymerase switching.R-HSA-69091	1
627	TRUE	FALSE	Modulation by Mtb of host immune system.R-HSA-9637628	1
628	TRUE	FALSE	Metabolism of vitamin K.R-HSA-6806664	1
629	TRUE	FALSE	Metabolism of porphyrins.R-HSA-189445	1
630	TRUE	FALSE	Membrane binding and targetting of GAG proteins.R-HSA-174490	1
631	TRUE	FALSE	IkBA variant leads to EDA-ID.R-HSA-5603029	1
632	TRUE	FALSE	Immunoregulatory interactions between a Lymphoid and a non-Lymphoid cell.R-HSA-198933	1
633	TRUE	FALSE	Insulin-like Growth Factor-2 mRNA Binding Proteins (IGF2BPs-IMPs-VICKZs) bind RNA.R-HSA-428359	1
634	TRUE	FALSE	Interaction between L1 and Ankyrins.R-HSA-445095	1
635	TRUE	FALSE	Interleukin-18 signaling.R-HSA-9012546	1
636	TRUE	FALSE	Interleukin-33 signaling.R-HSA-9014843	1
637	TRUE	FALSE	Interleukin-36 pathway.R-HSA-9014826	1
638	TRUE	FALSE	Intra-Golgi traffic.R-HSA-6811438	1
639	TRUE	FALSE	Intracellular oxygen transport.R-HSA-8981607	1
640	TRUE	FALSE	Ion homeostasis.R-HSA-5578775	1
641	TRUE	FALSE	Ion influx-efflux at host-pathogen interface.R-HSA-6803544	1
642	TRUE	FALSE	Keratinization.R-HSA-6805567	1
643	TRUE	FALSE	L1CAM interactions.R-HSA-373760	1
644	TRUE	FALSE	Lagging Strand Synthesis.R-HSA-69186	1
645	TRUE	FALSE	Leading Strand Synthesis.R-HSA-69109	1
646	TRUE	FALSE	Lipid particle organization.R-HSA-8964572	1
647	TRUE	FALSE	MET activates PTK2 signaling.R-HSA-8874081	1
648	FALSE	TRUE	Attachment of GPI anchor to uPAR.R-HSA-162791	1
649	FALSE	TRUE	Attenuation phase.R-HSA-3371568	1
650	FALSE	TRUE	Autointegration results in viral DNA circles.R-HSA-177539	1
651	FALSE	TRUE	Formation of RNA Pol II elongation complex .R-HSA-112382	1
652	FALSE	TRUE	Fatty acid metabolism.R-HSA-8978868	1
653	FALSE	TRUE	Fatty acyl-CoA biosynthesis.R-HSA-75105	1
654	FALSE	TRUE	Fc epsilon receptor (FCERI) signaling.R-HSA-2454202	1
655	FALSE	TRUE	Fcgamma receptor (FCGR) dependent phagocytosis.R-HSA-2029480	1
656	FALSE	TRUE	Fibronectin matrix formation.R-HSA-1566977	1
657	FALSE	TRUE	Folding of actin by CCT-TriC.R-HSA-390450	1
658	FALSE	TRUE	Formation of HIV elongation complex in the absence of HIV Tat.R-HSA-167152	1
659	FALSE	TRUE	Formation of HIV-1 elongation complex containing HIV-1 Tat.R-HSA-167200	1
660	FALSE	TRUE	Formation of Senescence-Associated Heterochromatin Foci (SAHF).R-HSA-2559584	1
661	TRUE	FALSE	ALKBH2 mediated reversal of alkylation damage.R-HSA-112122	1
662	FALSE	TRUE	Formation of TC-NER Pre-Incision Complex.R-HSA-6781823	1
663	FALSE	TRUE	Formation of annular gap junctions.R-HSA-196025	1
664	FALSE	TRUE	Formation of the Early Elongation Complex.R-HSA-113418	1
665	FALSE	TRUE	Formation of the HIV-1 Early Elongation Complex.R-HSA-167158	1
666	FALSE	TRUE	Formation of the beta-catenin:TCF transactivating complex.R-HSA-201722	1
667	FALSE	TRUE	Formation of the ternary complex, and subsequently, the 43S complex.R-HSA-72695	1
668	FALSE	TRUE	G alpha (i) signalling events.R-HSA-418594	1
669	FALSE	TRUE	G beta:gamma signalling through CDC42.R-HSA-8964616	1
670	FALSE	TRUE	Factors involved in megakaryocyte development and platelet production.R-HSA-983231	1
671	FALSE	TRUE	FGFR2 alternative splicing.R-HSA-6803529	1
672	FALSE	TRUE	Autophagy.R-HSA-9612973	1
673	FALSE	TRUE	Erythropoietin activates Phosphoinositide-3-kinase (PI3K).R-HSA-9027276	1
674	FALSE	TRUE	ERBB2 Regulates Cell Motility.R-HSA-6785631	1
675	FALSE	TRUE	ERKs are inactivated.R-HSA-202670	1
676	FALSE	TRUE	ESR-mediated signaling.R-HSA-8939211	1
677	FALSE	TRUE	Early Phase of HIV Life Cycle.R-HSA-162594	1
678	FALSE	TRUE	Elevation of cytosolic Ca2+ levels.R-HSA-139853	1
679	FALSE	TRUE	Energy dependent regulation of mTOR by LKB1-AMPK.R-HSA-380972	1
680	FALSE	TRUE	Entry of Influenza Virion into Host Cell via Endocytosis.R-HSA-168275	1
681	FALSE	TRUE	Ephrin signaling.R-HSA-3928664	1
682	FALSE	TRUE	Erythropoietin activates Phospholipase C gamma (PLCG).R-HSA-9027277	1
683	FALSE	TRUE	FCGR3A-mediated phagocytosis.R-HSA-9664422	1
684	FALSE	TRUE	Erythropoietin activates RAS.R-HSA-9027284	1
685	FALSE	TRUE	Erythropoietin activates STAT5.R-HSA-9027283	1
686	FALSE	TRUE	Estrogen biosynthesis.R-HSA-193144	1
687	FALSE	TRUE	Estrogen-dependent gene expression.R-HSA-9018519	1
688	FALSE	TRUE	Export of Viral Ribonucleoproteins from Nucleus.R-HSA-168274	1
689	FALSE	TRUE	FCERI mediated Ca+2 mobilization.R-HSA-2871809	1
690	FALSE	TRUE	FCERI mediated MAPK activation.R-HSA-2871796	1
691	FALSE	TRUE	FCERI mediated NF-kB activation.R-HSA-2871837	1
692	FALSE	TRUE	G-protein beta:gamma signalling.R-HSA-397795	1
693	FALSE	TRUE	G1 Phase.R-HSA-69236	1
694	FALSE	TRUE	G2-M Transition.R-HSA-69275	1
695	FALSE	TRUE	Infection with Mycobacterium tuberculosis.R-HSA-9635486	1
696	FALSE	TRUE	Host Interactions of HIV factors.R-HSA-162909	1
697	FALSE	TRUE	HuR (ELAVL1) binds and stabilizes mRNA.R-HSA-450520	1
698	FALSE	TRUE	IKK complex recruitment mediated by RIP1.R-HSA-937041	1
699	FALSE	TRUE	IL-6-type cytokine receptor ligand interactions.R-HSA-6788467	1
700	FALSE	TRUE	IRE1alpha activates chaperones.R-HSA-381070	1
701	FALSE	TRUE	ISG15 antiviral mechanism.R-HSA-1169408	1
702	FALSE	TRUE	Immune System.R-HSA-168256	1
703	FALSE	TRUE	Inactivation of CDC42 and RAC1.R-HSA-428543	1
704	FALSE	TRUE	Infectious disease.R-HSA-5663205	1
705	FALSE	TRUE	GAB1 signalosome.R-HSA-180292	1
706	FALSE	TRUE	Inflammasomes.R-HSA-622312	1
707	FALSE	TRUE	Influenza Infection.R-HSA-168255	1
708	FALSE	TRUE	Influenza Viral RNA Transcription and Replication.R-HSA-168273	1
709	FALSE	TRUE	Inhibition of Host mRNA Processing and RNA Silencing.R-HSA-168315	1
710	FALSE	TRUE	Inhibition of Signaling by Overexpressed EGFR.R-HSA-5638303	1
711	FALSE	TRUE	Inhibition of TSC complex formation by PKB.R-HSA-165181	1
712	FALSE	TRUE	Inhibition of nitric oxide production.R-HSA-9636249	1
713	FALSE	TRUE	Inhibition of replication initiation of damaged DNA by RB1-E2F1.R-HSA-113501	1
714	FALSE	TRUE	Heparan sulfate-heparin (HS-GAG) metabolism.R-HSA-1638091	1
715	FALSE	TRUE	Hedgehog ligand biogenesis.R-HSA-5358346	1
716	FALSE	TRUE	Hedgehog 'on' state.R-HSA-5632684	1
717	FALSE	TRUE	HSF1-dependent transactivation.R-HSA-3371571	1
718	FALSE	TRUE	GLI proteins bind promoters of Hh responsive genes to promote transcription.R-HSA-5635851	1
719	FALSE	TRUE	GLI3 is processed to GLI3R by the proteasome.R-HSA-5610785	1
720	FALSE	TRUE	GRB2 events in EGFR signaling.R-HSA-179812	1
721	FALSE	TRUE	GRB2 events in ERBB2 signaling.R-HSA-1963640	1
722	FALSE	TRUE	Gap junction degradation.R-HSA-190873	1
723	FALSE	TRUE	Gastrin-CREB signalling pathway via PKC and MAPK.R-HSA-881907	1
724	FALSE	TRUE	Gene and protein expression by JAK-STAT signaling after Interleukin-12 stimulation.R-HSA-8950505	1
725	FALSE	TRUE	Generic Transcription Pathway.R-HSA-212436	1
726	FALSE	TRUE	Glycosphingolipid metabolism.R-HSA-1660662	1
727	FALSE	TRUE	Golgi-to-ER retrograde transport.R-HSA-8856688	1
728	FALSE	TRUE	HDR through MMEJ (alt-NHEJ).R-HSA-5685939	1
729	FALSE	TRUE	HIV Infection.R-HSA-162906	1
730	FALSE	TRUE	HIV Life Cycle.R-HSA-162587	1
731	FALSE	TRUE	HIV Transcription Elongation.R-HSA-167169	1
732	FALSE	TRUE	HIV elongation arrest and recovery.R-HSA-167287	1
733	FALSE	TRUE	HS-GAG degradation.R-HSA-2024096	1
734	FALSE	TRUE	HSF1 activation.R-HSA-3371511	1
735	FALSE	TRUE	ERBB2 Activates PTK6 Signaling.R-HSA-8847993	1
736	FALSE	TRUE	ER-Phagosome pathway.R-HSA-1236974	1
737	FALSE	TRUE	ER to Golgi Anterograde Transport.R-HSA-199977	1
738	FALSE	TRUE	Cell recruitment (pro-inflammatory response).R-HSA-9664424	1
739	FALSE	TRUE	Calcineurin activates NFAT.R-HSA-2025928	1
740	FALSE	TRUE	Calmodulin induced events.R-HSA-111933	1
741	FALSE	TRUE	Cargo concentration in the ER.R-HSA-5694530	1
742	FALSE	TRUE	Cargo recognition for clathrin-mediated endocytosis.R-HSA-8856825	1
743	FALSE	TRUE	Caspase activation via Death Receptors in the presence of ligand.R-HSA-140534	1
744	FALSE	TRUE	Caspase activation via extrinsic apoptotic signalling pathway.R-HSA-5357769	1
745	FALSE	TRUE	Cell Cycle Checkpoints.R-HSA-69620	1
746	FALSE	TRUE	Cell Cycle, Mitotic.R-HSA-69278	1
747	FALSE	TRUE	Cell surface interactions at the vascular wall.R-HSA-202733	1
748	FALSE	TRUE	Circadian Clock.R-HSA-400253	1
749	FALSE	TRUE	Cellular Senescence.R-HSA-2559583	1
750	FALSE	TRUE	Cellular response to heat stress.R-HSA-3371556	1
751	FALSE	TRUE	Cellular response to hypoxia.R-HSA-1234174	1
752	FALSE	TRUE	Cellular responses to external stimuli.R-HSA-8953897	1
753	FALSE	TRUE	Cellular responses to stress.R-HSA-2262752	1
754	FALSE	TRUE	Chaperonin-mediated protein folding.R-HSA-390466	1
755	FALSE	TRUE	Chk1-Chk2(Cds1) mediated inactivation of Cyclin B:Cdk1 complex.R-HSA-75035	1
756	FALSE	TRUE	Chromatin modifying enzymes.R-HSA-3247509	1
757	FALSE	TRUE	CaMK IV-mediated phosphorylation of CREB.R-HSA-111932	1
758	FALSE	TRUE	CaM pathway.R-HSA-111997	1
759	FALSE	TRUE	Ca2+ pathway.R-HSA-4086398	1
760	FALSE	TRUE	Ca-dependent events.R-HSA-111996	1
761	FALSE	TRUE	Axon guidance.R-HSA-422475	1
762	FALSE	TRUE	BBSome-mediated cargo-targeting to cilium.R-HSA-5620922	1
763	FALSE	TRUE	Basigin interactions.R-HSA-210991	1
764	FALSE	TRUE	Beta-catenin independent WNT signaling.R-HSA-3858494	1
765	FALSE	TRUE	Beta-catenin phosphorylation cascade.R-HSA-196299	1
766	FALSE	TRUE	Bicarbonate transporters.R-HSA-425381	1
767	FALSE	TRUE	Biotin transport and metabolism.R-HSA-196780	1
768	FALSE	TRUE	Blockage of phagosome acidification.R-HSA-9636467	1
769	FALSE	TRUE	Butyrophilin (BTN) family interactions.R-HSA-8851680	1
770	FALSE	TRUE	C-type lectin receptors (CLRs).R-HSA-5621481	1
771	FALSE	TRUE	CLEC7A (Dectin-1) induces NFAT activation.R-HSA-5607763	1
772	FALSE	TRUE	CLEC7A (Dectin-1) signaling.R-HSA-5607764	1
773	FALSE	TRUE	COPI-mediated anterograde transport.R-HSA-6807878	1
774	FALSE	TRUE	COPII-mediated vesicle transport.R-HSA-204005	1
775	FALSE	TRUE	COX reactions.R-HSA-140180	1
776	FALSE	TRUE	CREB1 phosphorylation through the activation of CaMKII-CaMKK-CaMKIV cascasde.R-HSA-442729	1
777	FALSE	TRUE	CRMPs in Sema3A signaling.R-HSA-399956	1
778	FALSE	TRUE	Chromatin organization.R-HSA-4839726	1
779	FALSE	TRUE	Citric acid cycle (TCA cycle).R-HSA-71403	1
780	FALSE	TRUE	EPH-ephrin mediated repulsion of cells.R-HSA-3928665	1
781	FALSE	TRUE	Downregulation of SMAD2-3:SMAD4 transcriptional activity.R-HSA-2173795	1
782	FALSE	TRUE	Degradation of AXIN.R-HSA-4641257	1
783	FALSE	TRUE	Degradation of beta-catenin by the destruction complex.R-HSA-195253	1
784	FALSE	TRUE	Detoxification of Reactive Oxygen Species.R-HSA-3299685	1
785	FALSE	TRUE	Deubiquitination.R-HSA-5688426	1
786	FALSE	TRUE	Developmental Biology.R-HSA-1266738	1
787	FALSE	TRUE	Disassembly of the destruction complex and recruitment of AXIN to the membrane.R-HSA-4641262	1
788	FALSE	TRUE	Disease.R-HSA-1643685	1
789	FALSE	TRUE	Diseases of signal transduction by growth factor receptors and second messengers.R-HSA-5663202	1
790	FALSE	TRUE	Downregulation of TGF-beta receptor signaling.R-HSA-2173788	1
791	FALSE	TRUE	Class I MHC mediated antigen processing & presentation.R-HSA-983169	1
792	FALSE	TRUE	Downstream TCR signaling.R-HSA-202424	1
793	FALSE	TRUE	Downstream signal transduction.R-HSA-186763	1
794	FALSE	TRUE	Downstream signaling events of B Cell Receptor (BCR).R-HSA-1168372	1
795	FALSE	TRUE	E2F mediated regulation of DNA replication.R-HSA-113510	1
796	FALSE	TRUE	E2F-enabled inhibition of pre-replication complex formation.R-HSA-113507	1
797	FALSE	TRUE	EGFR Transactivation by Gastrin.R-HSA-2179392	1
798	FALSE	TRUE	EGFR interacts with phospholipase C-gamma.R-HSA-212718	1
799	FALSE	TRUE	EPH-Ephrin signaling.R-HSA-2682334	1
800	FALSE	TRUE	Dectin-1 mediated noncanonical NF-kB signaling.R-HSA-5607761	1
801	FALSE	TRUE	Death Receptor Signalling.R-HSA-73887	1
802	FALSE	TRUE	Deactivation of the beta-catenin transactivating complex.R-HSA-3769402	1
803	FALSE	TRUE	DNA Repair.R-HSA-73894	1
804	FALSE	TRUE	Clathrin-mediated endocytosis.R-HSA-8856828	1
805	FALSE	TRUE	Cobalamin (Cbl, vitamin B12) transport and metabolism.R-HSA-196741	1
806	FALSE	TRUE	Complement cascade.R-HSA-166658	1
807	FALSE	TRUE	Constitutive Signaling by Aberrant PI3K in Cancer.R-HSA-2219530	1
808	FALSE	TRUE	Constitutive Signaling by EGFRvIII.R-HSA-5637810	1
809	FALSE	TRUE	Constitutive Signaling by Ligand-Responsive EGFR Cancer Variants.R-HSA-1236382	1
810	FALSE	TRUE	Constitutive Signaling by NOTCH1 t(7
811	FALSE	TRUE	Constitutive Signaling by Overexpressed ERBB2.R-HSA-9634285	1
812	FALSE	TRUE	Cooperation of PDCL (PhLP1) and TRiC-CCT in G-protein beta folding.R-HSA-6814122	1
813	FALSE	TRUE	Costimulation by the CD28 family.R-HSA-388841	1
814	FALSE	TRUE	Cyclin D associated events in G1.R-HSA-69231	1
815	FALSE	TRUE	Cytosolic sensors of pathogen-associated DNA .R-HSA-1834949	1
816	FALSE	TRUE	DAG and IP3 signaling.R-HSA-1489509	1
817	FALSE	TRUE	DAP12 signaling.R-HSA-2424491	1
818	FALSE	TRUE	DDX58-IFIH1-mediated induction of interferon-alpha-beta.R-HSA-168928	1
819	FALSE	TRUE	DEx-H-box helicases activate type I IFN and inflammatory cytokines production .R-HSA-3134963	1
820	FALSE	TRUE	DNA Damage-Telomere Stress Induced Senescence.R-HSA-2559586	1
821	FALSE	TRUE	vRNP Assembly.R-HSA-192905	1

## Sheet: group_3_overlap_down_pathways
	Nijmegen breakage syndrome	Bloom syndrome	id	num
0	TRUE	TRUE	Surfactant metabolism.R-HSA-5683826	2
1	TRUE	TRUE	Noncanonical activation of NOTCH3.R-HSA-9017802	2
2	TRUE	FALSE	2-LTR circle formation.R-HSA-164843	1
3	TRUE	FALSE	Recycling of eIF2:GDP.R-HSA-72731	1
4	TRUE	FALSE	Regulation of lipid metabolism by PPARalpha.R-HSA-400206	1
5	TRUE	FALSE	Regulation of insulin secretion.R-HSA-422356	1
6	TRUE	FALSE	Regulation of beta-cell development.R-HSA-186712	1
7	TRUE	FALSE	Regulation of TP53 Expression and Degradation.R-HSA-6806003	1
8	TRUE	FALSE	Regulation of TP53 Degradation.R-HSA-6804757	1
9	TRUE	FALSE	Regulation of TP53 Activity.R-HSA-5633007	1
10	TRUE	FALSE	Regulation of TP53 Activity through Phosphorylation.R-HSA-6804756	1
11	TRUE	FALSE	Regulation of PLK1 Activity at G2-M Transition.R-HSA-2565942	1
12	TRUE	FALSE	Regulation of FOXO transcriptional activity by acetylation.R-HSA-9617629	1
13	TRUE	FALSE	Regulation of APC-C activators between G1-S and early anaphase.R-HSA-176408	1
14	TRUE	FALSE	Reduction of cytosolic Ca++ levels.R-HSA-418359	1
15	TRUE	FALSE	Recycling pathway of L1.R-HSA-437239	1
16	TRUE	FALSE	Recruitment of mitotic centrosome proteins and complexes.R-HSA-380270	1
17	TRUE	FALSE	Regulation of mitotic cell cycle.R-HSA-453276	1
18	TRUE	FALSE	Recruitment of NuMA to mitotic centrosomes.R-HSA-380320	1
19	TRUE	FALSE	Recruitment and ATM-mediated phosphorylation of repair and signaling proteins at DNA double strand breaks.R-HSA-5693565	1
20	TRUE	FALSE	RUNX3 Regulates Immune Response and Cell Migration.R-HSA-8949275	1
21	TRUE	FALSE	RUNX2 regulates chondrocyte maturation.R-HSA-8941284	1
22	TRUE	FALSE	RUNX1 regulates transcription of genes involved in interleukin signaling.R-HSA-8939247	1
23	TRUE	FALSE	RUNX1 regulates transcription of genes involved in WNT signaling.R-HSA-8939256	1
24	TRUE	FALSE	RUNX1 regulates transcription of genes involved in BCR signaling.R-HSA-8939245	1
25	TRUE	FALSE	RUNX1 interacts with co-factors whose precise effect on RUNX1 targets is not known.R-HSA-8939243	1
26	TRUE	FALSE	RORA activates gene expression.R-HSA-1368082	1
27	TRUE	FALSE	RNA Polymerase III Transcription Initiation From Type 2 Promoter.R-HSA-76066	1
28	TRUE	FALSE	RNA Polymerase II Transcription Termination.R-HSA-73856	1
29	TRUE	FALSE	RNA Polymerase II Transcription Elongation.R-HSA-75955	1
30	TRUE	FALSE	RNA Polymerase II Pre-transcription Events.R-HSA-674695	1
31	TRUE	FALSE	RMTs methylate histone arginines.R-HSA-3214858	1
32	TRUE	FALSE	Regulation of localization of FOXO transcription factors.R-HSA-9614399	1
33	TRUE	FALSE	Regulation of ornithine decarboxylase (ODC).R-HSA-350562	1
34	TRUE	FALSE	RHO GTPases Activate Formins.R-HSA-5663220	1
35	TRUE	FALSE	Release of Hh-Np from the secreting cell.R-HSA-5362798	1
36	TRUE	FALSE	Scavenging by Class F Receptors.R-HSA-3000484	1
37	TRUE	FALSE	SUMOylation.R-HSA-2990846	1
38	TRUE	FALSE	SUMOylation of ubiquitinylation proteins.R-HSA-3232142	1
39	TRUE	FALSE	SUMOylation of transcription cofactors.R-HSA-3899300	1
40	TRUE	FALSE	SUMOylation of intracellular receptors.R-HSA-4090294	1
41	TRUE	FALSE	SUMOylation of immune response proteins.R-HSA-4755510	1
42	TRUE	FALSE	SUMOylation of DNA replication proteins.R-HSA-4615885	1
43	TRUE	FALSE	SUMOylation of DNA damage response and repair proteins.R-HSA-3108214	1
44	TRUE	FALSE	SUMO is transferred from E1 to E2 (UBE2I, UBC9).R-HSA-3065678	1
45	TRUE	FALSE	SUMO is conjugated to E1 (UBA2:SAE1).R-HSA-3065676	1
46	TRUE	FALSE	SUMO E3 ligases SUMOylate target proteins.R-HSA-3108232	1
47	TRUE	FALSE	SMAC, XIAP-regulated apoptotic response.R-HSA-111469	1
48	TRUE	FALSE	SMAC(DIABLO)-mediated dissociation of IAP:caspase complexes .R-HSA-111464	1
49	TRUE	FALSE	SMAC (DIABLO) binds to IAPs .R-HSA-111463	1
50	TRUE	FALSE	SLC-mediated transmembrane transport.R-HSA-425407	1
51	TRUE	FALSE	SLBP independent Processing of Histone Pre-mRNAs.R-HSA-111367	1
52	TRUE	FALSE	SLBP Dependent Processing of Replication-Dependent Histone Pre-mRNAs.R-HSA-77588	1
53	TRUE	FALSE	SCF(Skp2)-mediated degradation of p27-p21.R-HSA-187577	1
54	TRUE	FALSE	Role of second messengers in netrin-1 signaling.R-HSA-418890	1
55	TRUE	FALSE	Role of phospholipids in phagocytosis.R-HSA-2029485	1
56	TRUE	FALSE	Role of LAT2-NTAL-LAB on calcium mobilization.R-HSA-2730905	1
57	TRUE	FALSE	Rho GTPase cycle.R-HSA-194840	1
58	TRUE	FALSE	Rev-mediated nuclear export of HIV RNA.R-HSA-165054	1
59	TRUE	FALSE	Response of Mtb to phagocytosis.R-HSA-9637690	1
60	TRUE	FALSE	Resolution of AP sites via the single-nucleotide replacement pathway.R-HSA-110381	1
61	TRUE	FALSE	Reproduction.R-HSA-1474165	1
62	TRUE	FALSE	Release of apoptotic factors from the mitochondria.R-HSA-111457	1
63	TRUE	FALSE	RHO GTPases Activate NADPH Oxidases.R-HSA-5668599	1
64	TRUE	FALSE	RET signaling.R-HSA-8853659	1
65	TRUE	FALSE	Signal amplification.R-HSA-392518	1
66	TRUE	FALSE	Nicotinate metabolism.R-HSA-196807	1
67	TRUE	FALSE	Organic anion transporters.R-HSA-428643	1
68	TRUE	FALSE	Orc1 removal from chromatin.R-HSA-68949	1
69	TRUE	FALSE	Opioid Signalling.R-HSA-111885	1
70	TRUE	FALSE	Oncogene Induced Senescence.R-HSA-2559585	1
71	TRUE	FALSE	Oligomerization of connexins into connexons.R-HSA-190704	1
72	TRUE	FALSE	Nucleobase catabolism.R-HSA-8956319	1
73	TRUE	FALSE	Nucleobase biosynthesis.R-HSA-8956320	1
74	TRUE	FALSE	Nuclear import of Rev protein.R-HSA-180746	1
75	TRUE	FALSE	Nuclear Pore Complex (NPC) Disassembly.R-HSA-3301854	1
76	TRUE	FALSE	Nuclear Envelope Breakdown.R-HSA-2980766	1
77	TRUE	FALSE	Nonhomologous End-Joining (NHEJ).R-HSA-5693571	1
78	TRUE	FALSE	Non-integrin membrane-ECM interactions.R-HSA-3000171	1
79	TRUE	FALSE	Nitric oxide stimulates guanylate cyclase.R-HSA-392154	1
80	TRUE	FALSE	Neurotransmitter clearance.R-HSA-112311	1
81	TRUE	FALSE	PAOs oxidise polyamines to amines.R-HSA-141334	1
82	TRUE	FALSE	Neurotoxicity of clostridium toxins.R-HSA-168799	1
83	TRUE	FALSE	Netrin mediated repulsion signals.R-HSA-418886	1
84	TRUE	FALSE	Negative regulation of TCF-dependent signaling by DVL-interacting proteins.R-HSA-5368598	1
85	TRUE	FALSE	Negative regulation of FGFR4 signaling.R-HSA-5654733	1
86	TRUE	FALSE	Negative regulation of FGFR3 signaling.R-HSA-5654732	1
87	TRUE	FALSE	Negative regulation of FGFR2 signaling.R-HSA-5654727	1
88	TRUE	FALSE	Negative regulation of FGFR1 signaling.R-HSA-5654726	1
89	TRUE	FALSE	Nef-mediates down modulation of cell surface receptors by recruiting them to clathrin adapters.R-HSA-164938	1
90	TRUE	FALSE	Nef Mediated CD8 Down-regulation.R-HSA-182218	1
91	TRUE	FALSE	Neddylation.R-HSA-8951664	1
92	TRUE	FALSE	NS1 Mediated Effects on Host Pathways.R-HSA-168276	1
93	TRUE	FALSE	NR1H2 & NR1H3 regulate gene expression linked to lipogenesis.R-HSA-9029558	1
94	TRUE	FALSE	NOTCH3 Activation and Transmission of Signal to the Nucleus.R-HSA-9013507	1
95	TRUE	FALSE	Organic cation transport.R-HSA-549127	1
96	TRUE	FALSE	PI and PC transport between ER and Golgi membranes.R-HSA-1483196	1
97	TRUE	FALSE	RAF activation.R-HSA-5673000	1
98	TRUE	FALSE	Potassium Channels.R-HSA-1296071	1
99	TRUE	FALSE	Pyruvate metabolism and Citric Acid (TCA) cycle.R-HSA-71406	1
100	TRUE	FALSE	Purine ribonucleoside monophosphate biosynthesis.R-HSA-73817	1
101	TRUE	FALSE	Purine catabolism.R-HSA-74259	1
102	TRUE	FALSE	Protein ubiquitination.R-HSA-8852135	1
103	TRUE	FALSE	Prostacyclin signalling through prostacyclin receptor.R-HSA-392851	1
104	TRUE	FALSE	Processing of SMDT1.R-HSA-8949664	1
105	TRUE	FALSE	Processing of DNA double-strand break ends.R-HSA-5693607	1
106	TRUE	FALSE	Processing of Capped Intron-Containing Pre-mRNA.R-HSA-72203	1
107	TRUE	FALSE	Processing and activation of SUMO.R-HSA-3215018	1
108	TRUE	FALSE	Presynaptic function of Kainate receptors.R-HSA-500657	1
109	TRUE	FALSE	Pregnenolone biosynthesis.R-HSA-196108	1
110	TRUE	FALSE	Prefoldin mediated transfer of substrate to CCT-TriC.R-HSA-389957	1
111	TRUE	FALSE	Pre-NOTCH Processing in Golgi.R-HSA-1912420	1
112	TRUE	FALSE	Post-translational protein phosphorylation.R-HSA-8957275	1
113	TRUE	FALSE	PI-3K cascade:FGFR4.R-HSA-5654720	1
114	TRUE	FALSE	Polo-like kinase mediated events.R-HSA-156711	1
115	TRUE	FALSE	Plasma lipoprotein remodeling.R-HSA-8963899	1
116	TRUE	FALSE	Phosphorylation of the APC-C.R-HSA-176412	1
117	TRUE	FALSE	Phosphorylation of Emi1.R-HSA-176417	1
118	TRUE	FALSE	Phospholipase C-mediated cascade
119	TRUE	FALSE	Phospholipase C-mediated cascade: FGFR1.R-HSA-5654219	1
120	TRUE	FALSE	Peroxisomal lipid metabolism.R-HSA-390918	1
121	TRUE	FALSE	Pausing and recovery of Tat-mediated HIV elongation.R-HSA-167238	1
122	TRUE	FALSE	Pausing and recovery of HIV elongation.R-HSA-167290	1
123	TRUE	FALSE	PTK6 Regulates Proteins Involved in RNA Processing.R-HSA-8849468	1
124	TRUE	FALSE	PTK6 Down-Regulation.R-HSA-8849472	1
125	TRUE	FALSE	PPARA activates gene expression.R-HSA-1989781	1
126	TRUE	FALSE	POLB-Dependent Long Patch Base Excision Repair.R-HSA-110362	1
127	TRUE	FALSE	Sealing of the nuclear envelope (NE) by ESCRT-III.R-HSA-9668328	1
128	TRUE	FALSE	Signal attenuation.R-HSA-74749	1
129	TRUE	FALSE	ADORA2B mediated anti-inflammatory cytokines production.R-HSA-9660821	1
130	TRUE	FALSE	Transport of Ribonucleoproteins into the Host Nucleus.R-HSA-168271	1
131	TRUE	FALSE	VEGFR2 mediated cell proliferation.R-HSA-5218921	1
132	TRUE	FALSE	Urea cycle.R-HSA-70635	1
133	TRUE	FALSE	Uptake and function of anthrax toxins.R-HSA-5210891	1
134	TRUE	FALSE	Uptake and actions of bacterial toxins.R-HSA-5339562	1
135	TRUE	FALSE	Unwinding of DNA.R-HSA-176974	1
136	TRUE	FALSE	Ubiquitin-dependent degradation of Cyclin D.R-HSA-75815	1
137	TRUE	FALSE	UCH proteinases.R-HSA-5689603	1
138	TRUE	FALSE	Triglyceride metabolism.R-HSA-8979227	1
139	TRUE	FALSE	Triglyceride catabolism.R-HSA-163560	1
140	TRUE	FALSE	Transport of the SLBP independent Mature mRNA.R-HSA-159227	1
141	TRUE	FALSE	Transport of the SLBP Dependant Mature mRNA.R-HSA-159230	1
142	TRUE	FALSE	Transport of organic anions.R-HSA-879518	1
143	TRUE	FALSE	Transport of inorganic cations-anions and amino acids-oligopeptides.R-HSA-425393	1
144	TRUE	FALSE	Transport of Mature mRNAs Derived from Intronless Transcripts.R-HSA-159234	1
145	TRUE	FALSE	Vitamin B5 (pantothenate) metabolism.R-HSA-199220	1
146	TRUE	FALSE	Transport of Mature mRNA derived from an Intron-Containing Transcript.R-HSA-159236	1
147	TRUE	FALSE	Transport of Mature mRNA Derived from an Intronless Transcript.R-HSA-159231	1
148	TRUE	FALSE	Transport of Mature Transcript to Cytoplasm.R-HSA-72202	1
149	TRUE	FALSE	Transferrin endocytosis and recycling.R-HSA-917977	1
150	TRUE	FALSE	Transcriptional regulation of white adipocyte differentiation.R-HSA-381340	1
151	TRUE	FALSE	Transcriptional activation of p53 responsive genes .R-HSA-69560	1
152	TRUE	FALSE	Transcriptional activation of mitochondrial biogenesis.R-HSA-2151201	1
153	TRUE	FALSE	Transcriptional Regulation by VENTX.R-HSA-8853884	1
154	TRUE	FALSE	Transcriptional Regulation by E2F6.R-HSA-8953750	1
155	TRUE	FALSE	Transcriptional activation of cell cycle inhibitor p21 .R-HSA-69895	1
156	TRUE	FALSE	Transcription-Coupled Nucleotide Excision Repair (TC-NER).R-HSA-6781827	1
157	TRUE	FALSE	Transcription of E2F targets under negative control by p107 (RBL1) and p130 (RBL2) in complex with HDAC1.R-HSA-1362300	1
158	TRUE	FALSE	Transcription of E2F targets under negative control by DREAM complex.R-HSA-1362277	1
159	TRUE	FALSE	Vasopressin regulates renal water homeostasis via Aquaporins.R-HSA-432040	1
160	TRUE	FALSE	Vpr-mediated nuclear import of PICs.R-HSA-180910	1
161	TRUE	FALSE	Toxicity of botulinum toxin type F (BoNT-F).R-HSA-5250981	1
162	FALSE	TRUE	CS-DS degradation.R-HSA-2024101	1
163	FALSE	TRUE	Synthesis of IP2, IP, and Ins in the cytosol.R-HSA-1855183	1
164	FALSE	TRUE	Smooth Muscle Contraction.R-HSA-445355	1
165	FALSE	TRUE	Sema4D induced cell migration and growth-cone collapse.R-HSA-416572	1
166	FALSE	TRUE	Sema4D in semaphorin signaling.R-HSA-400685	1
167	FALSE	TRUE	RHO GTPases Activate ROCKs.R-HSA-5627117	1
168	FALSE	TRUE	Muscle contraction.R-HSA-397014	1
169	FALSE	TRUE	Metabolism of carbohydrates.R-HSA-71387	1
170	FALSE	TRUE	Inositol phosphate metabolism.R-HSA-1483249	1
171	FALSE	TRUE	Glycosaminoglycan metabolism.R-HSA-1630316	1
172	FALSE	TRUE	Formation of editosomes by ADAR proteins.R-HSA-77042	1
173	FALSE	TRUE	ECM proteoglycans.R-HSA-3000178	1
174	FALSE	TRUE	Dermatan sulfate biosynthesis.R-HSA-2022923	1
175	FALSE	TRUE	Chondroitin sulfate biosynthesis.R-HSA-2022870	1
176	FALSE	TRUE	C6 deamination of adenosine.R-HSA-75102	1
177	TRUE	FALSE	WNT5A-dependent internalization of FZD4.R-HSA-5099900	1
178	TRUE	FALSE	vRNP Assembly.R-HSA-192905	1
179	TRUE	FALSE	tRNA processing in the mitochondrion.R-HSA-6785470	1
180	TRUE	FALSE	tRNA modification in the nucleus and cytosol.R-HSA-6782315	1
181	TRUE	FALSE	snRNP Assembly.R-HSA-191859	1
182	TRUE	FALSE	rRNA processing in the mitochondrion.R-HSA-8868766	1
183	TRUE	FALSE	p75NTR negatively regulates cell cycle via SC1.R-HSA-193670	1
184	TRUE	FALSE	p75 NTR receptor-mediated signalling.R-HSA-193704	1
185	TRUE	FALSE	p38MAPK events.R-HSA-171007	1
186	TRUE	FALSE	mRNA Splicing.R-HSA-72172	1
187	TRUE	FALSE	mRNA Splicing - Minor Pathway.R-HSA-72165	1
188	TRUE	FALSE	mRNA Splicing - Major Pathway.R-HSA-72163	1
189	TRUE	FALSE	mRNA 3'-end processing.R-HSA-72187	1
190	TRUE	FALSE	alpha-linolenic (omega3) and linoleic (omega6) acid metabolism.R-HSA-2046104	1
191	TRUE	FALSE	Transcription from mitochondrial promoters.R-HSA-75944	1
192	TRUE	FALSE	Toxicity of botulinum toxin type E (BoNT-E).R-HSA-5250992	1
193	TRUE	FALSE	Signaling by EGFR in Cancer.R-HSA-1643713	1
194	TRUE	FALSE	Signaling by NOTCH1.R-HSA-1980143	1
195	TRUE	FALSE	Switching of origins to a post-replicative state.R-HSA-69052	1
196	TRUE	FALSE	Suppression of phagosomal maturation.R-HSA-9637687	1
197	TRUE	FALSE	Sulfide oxidation to sulfate.R-HSA-1614517	1
198	TRUE	FALSE	Spry regulation of FGF signaling.R-HSA-1295596	1
199	TRUE	FALSE	Sodium-Calcium exchangers.R-HSA-425561	1
200	TRUE	FALSE	Signalling to STAT3.R-HSA-198745	1
201	TRUE	FALSE	Signaling by the B Cell Receptor (BCR).R-HSA-983705	1
202	TRUE	FALSE	Signaling by WNT.R-HSA-195721	1
203	TRUE	FALSE	Signaling by Retinoic Acid.R-HSA-5362517	1
204	TRUE	FALSE	Signaling by Receptor Tyrosine Kinases.R-HSA-9006934	1
205	TRUE	FALSE	Signaling by PTK6.R-HSA-8848021	1
206	TRUE	FALSE	Signaling by PDGF.R-HSA-186797	1
207	TRUE	FALSE	Signaling by Non-Receptor Tyrosine Kinases.R-HSA-9006927	1
208	TRUE	FALSE	Signaling by NOTCH1 t(7
209	TRUE	FALSE	Synthesis of (16-20)-hydroxyeicosatetraenoic acids (HETE).R-HSA-2142816	1
210	TRUE	FALSE	Signaling by Ligand-Responsive EGFR Variants in Cancer.R-HSA-5637815	1
211	TRUE	FALSE	Signaling by Insulin receptor.R-HSA-74752	1
212	TRUE	FALSE	Signaling by FGFR3.R-HSA-5654741	1
213	TRUE	FALSE	Signaling by FGFR3 point mutants in cancer.R-HSA-8853338	1
214	TRUE	FALSE	Signaling by FGFR3 in disease.R-HSA-5655332	1
215	TRUE	FALSE	Signaling by FGFR2 IIIa TM.R-HSA-8851708	1
216	TRUE	FALSE	Signaling by FGFR1.R-HSA-5654736	1
217	TRUE	FALSE	Signaling by FGFR.R-HSA-190236	1
218	TRUE	FALSE	Signaling by FGFR in disease.R-HSA-1226099	1
219	TRUE	FALSE	Signaling by ERBB2.R-HSA-1227986	1
220	TRUE	FALSE	Signaling by ERBB2 in Cancer.R-HSA-1227990	1
221	TRUE	FALSE	Signaling by ERBB2 TMD-JMD mutants.R-HSA-9665686	1
222	TRUE	FALSE	Signaling by EGFRvIII in Cancer.R-HSA-5637812	1
223	TRUE	FALSE	Syndecan interactions.R-HSA-3000170	1
224	TRUE	FALSE	Synthesis of 12-eicosatetraenoic acid derivatives.R-HSA-2142712	1
225	TRUE	FALSE	Toxicity of botulinum toxin type D (BoNT-D).R-HSA-5250955	1
226	TRUE	FALSE	TP53 Regulates Transcription of Cell Cycle Genes.R-HSA-6791312	1
227	TRUE	FALSE	Toxicity of botulinum toxin type A (BoNT-A).R-HSA-5250968	1
228	TRUE	FALSE	Thromboxane signalling through TP receptor.R-HSA-428930	1
229	TRUE	FALSE	Thrombin signalling through proteinase activated receptors (PARs).R-HSA-456926	1
230	TRUE	FALSE	The role of Nef in HIV-1 replication and disease pathogenesis.R-HSA-164952	1
231	TRUE	FALSE	The role of GTSE1 in G2-M progression after G2 checkpoint.R-HSA-8852276	1
232	TRUE	FALSE	The citric acid (TCA) cycle and respiratory electron transport.R-HSA-1428517	1
233	TRUE	FALSE	Tetrahydrobiopterin (BH4) synthesis, recycling, salvage and regulation.R-HSA-1474151	1
234	TRUE	FALSE	Telomere Extension By Telomerase.R-HSA-171319	1
235	TRUE	FALSE	Telomere C-strand synthesis initiation.R-HSA-174430	1
236	TRUE	FALSE	Tat-mediated HIV elongation arrest and recovery.R-HSA-167243	1
237	TRUE	FALSE	TRAIL signaling.R-HSA-75158	1
238	TRUE	FALSE	TRAF6 mediated IRF7 activation in TLR7-8 or 9 signaling.R-HSA-975110	1
239	TRUE	FALSE	TP53 Regulates Transcription of Genes Involved in G2 Cell Cycle Arrest.R-HSA-6804114	1
240	TRUE	FALSE	TNFR2 non-canonical NF-kB pathway.R-HSA-5668541	1
241	TRUE	FALSE	Synthesis of 15-eicosatetraenoic acid derivatives.R-HSA-2142770	1
242	TRUE	FALSE	TGF-beta receptor signaling in EMT (epithelial to mesenchymal transition).R-HSA-2173791	1
243	TRUE	FALSE	TGF-beta receptor signaling activates SMADs.R-HSA-2173789	1
244	TRUE	FALSE	TFAP2A acts as a transcriptional repressor during retinoic acid induced cell differentiation.R-HSA-8869496	1
245	TRUE	FALSE	TFAP2 (AP-2) family regulates transcription of cell cycle factors.R-HSA-8866911	1
246	TRUE	FALSE	TET1,2,3 and TDG demethylate DNA.R-HSA-5221030	1
247	TRUE	FALSE	TCF dependent signaling in response to WNT.R-HSA-201681	1
248	TRUE	FALSE	Synthesis, secretion, and inactivation of Glucagon-like Peptide-1 (GLP-1).R-HSA-381771	1
249	TRUE	FALSE	Synthesis of bile acids and bile salts via 7alpha-hydroxycholesterol.R-HSA-193368	1
250	TRUE	FALSE	Synthesis of active ubiquitin: roles of E1 and E2 enzymes.R-HSA-8866652	1
251	TRUE	FALSE	Synthesis of Prostaglandins (PG) and Thromboxanes (TX).R-HSA-2162123	1
252	TRUE	FALSE	Synthesis of PS.R-HSA-1483101	1
253	TRUE	FALSE	Synthesis of PG.R-HSA-1483148	1
254	TRUE	FALSE	Synthesis of 5-eicosatetraenoic acids.R-HSA-2142688	1
255	TRUE	FALSE	NOSIP mediated eNOS trafficking.R-HSA-203754	1
256	TRUE	FALSE	NIK-->noncanonical NF-kB signaling.R-HSA-5676590	1
257	TRUE	FALSE	NEP-NS2 Interacts with the Cellular Export Machinery.R-HSA-168333	1
258	TRUE	FALSE	Cell Cycle, Mitotic.R-HSA-69278	1
259	TRUE	FALSE	Constitutive Signaling by Overexpressed ERBB2.R-HSA-9634285	1
260	TRUE	FALSE	Constitutive Signaling by NOTCH1 t(7
261	TRUE	FALSE	Constitutive Signaling by Ligand-Responsive EGFR Cancer Variants.R-HSA-1236382	1
262	TRUE	FALSE	Constitutive Signaling by EGFRvIII.R-HSA-5637810	1
263	TRUE	FALSE	Collagen chain trimerization.R-HSA-8948216	1
264	TRUE	FALSE	Coenzyme A biosynthesis.R-HSA-196783	1
265	TRUE	FALSE	Clathrin-mediated endocytosis.R-HSA-8856828	1
266	TRUE	FALSE	Class I MHC mediated antigen processing & presentation.R-HSA-983169	1
267	TRUE	FALSE	Citric acid cycle (TCA cycle).R-HSA-71403	1
268	TRUE	FALSE	Cholesterol biosynthesis via lathosterol.R-HSA-6807062	1
269	TRUE	FALSE	ChREBP activates metabolic gene expression.R-HSA-163765	1
270	TRUE	FALSE	Centrosome maturation.R-HSA-380287	1
271	TRUE	FALSE	Cell Cycle.R-HSA-1640170	1
272	TRUE	FALSE	Cell Cycle Checkpoints.R-HSA-69620	1
273	TRUE	FALSE	Cooperation of PDCL (PhLP1) and TRiC-CCT in G-protein beta folding.R-HSA-6814122	1
274	TRUE	FALSE	Cdc20:Phospho-APC-C mediated degradation of Cyclin A.R-HSA-174184	1
275	TRUE	FALSE	Carnitine synthesis.R-HSA-71262	1
276	TRUE	FALSE	Carnitine metabolism.R-HSA-200425	1
277	TRUE	FALSE	Cargo recognition for clathrin-mediated endocytosis.R-HSA-8856825	1
278	TRUE	FALSE	COX reactions.R-HSA-140180	1
279	TRUE	FALSE	CLEC7A (Dectin-1) signaling.R-HSA-5607764	1
280	TRUE	FALSE	CDT1 association with the CDC6:ORC:origin complex.R-HSA-68827	1
281	TRUE	FALSE	CDK-mediated phosphorylation and removal of Cdc6.R-HSA-69017	1
282	TRUE	FALSE	CDC6 association with the ORC:origin complex.R-HSA-68689	1
283	TRUE	FALSE	C-type lectin receptors (CLRs).R-HSA-5621481	1
284	TRUE	FALSE	Breakdown of the nuclear lamina.R-HSA-352238	1
285	TRUE	FALSE	Biotin transport and metabolism.R-HSA-196780	1
286	TRUE	FALSE	Biosynthesis of protectin and resolvin conjugates in tissue regeneration (PCTR and RCTR).R-HSA-9026766	1
287	TRUE	FALSE	Conversion from APC-C:Cdc20 to APC-C:Cdh1 in late anaphase.R-HSA-176407	1
288	TRUE	FALSE	Cyclin A-B1-B2 associated events during G2-M transition.R-HSA-69273	1
289	TRUE	FALSE	Biosynthesis of EPA-derived SPMs.R-HSA-9018679	1
290	TRUE	FALSE	Dectin-1 mediated noncanonical NF-kB signaling.R-HSA-5607761	1
291	TRUE	FALSE	E2F-enabled inhibition of pre-replication complex formation.R-HSA-113507	1
292	TRUE	FALSE	E2F mediated regulation of DNA replication.R-HSA-113510	1
293	TRUE	FALSE	Dual incision in TC-NER.R-HSA-6782135	1
294	TRUE	FALSE	Drug-mediated inhibition of ERBB2 signaling.R-HSA-9652282	1
295	TRUE	FALSE	Downstream signaling of activated FGFR3.R-HSA-5654708	1
296	TRUE	FALSE	Downstream signaling of activated FGFR1.R-HSA-5654687	1
297	TRUE	FALSE	Downstream signal transduction.R-HSA-186763	1
298	TRUE	FALSE	Downregulation of SMAD2-3:SMAD4 transcriptional activity.R-HSA-2173795	1
299	TRUE	FALSE	Disease.R-HSA-1643685	1
300	TRUE	FALSE	Deubiquitination.R-HSA-5688426	1
301	TRUE	FALSE	Degradation of cysteine and homocysteine.R-HSA-1614558	1
302	TRUE	FALSE	Degradation of beta-catenin by the destruction complex.R-HSA-195253	1
303	TRUE	FALSE	Dectin-2 family.R-HSA-5621480	1
304	TRUE	FALSE	Deadenylation of mRNA.R-HSA-429947	1
305	TRUE	FALSE	Cyclin A:Cdk2-associated events at S phase entry.R-HSA-69656	1
306	TRUE	FALSE	Deactivation of the beta-catenin transactivating complex.R-HSA-3769402	1
307	TRUE	FALSE	DSCAM interactions.R-HSA-376172	1
308	TRUE	FALSE	DNA replication initiation.R-HSA-68952	1
309	TRUE	FALSE	DNA Replication Pre-Initiation.R-HSA-69002	1
310	TRUE	FALSE	DNA Repair.R-HSA-73894	1
311	TRUE	FALSE	DNA Double-Strand Break Repair.R-HSA-5693532	1
312	TRUE	FALSE	DNA Double Strand Break Response.R-HSA-5693606	1
313	TRUE	FALSE	DNA Damage-Telomere Stress Induced Senescence.R-HSA-2559586	1
314	TRUE	FALSE	DNA Damage Recognition in GG-NER.R-HSA-5696394	1
315	TRUE	FALSE	DEx-H-box helicases activate type I IFN and inflammatory cytokines production .R-HSA-3134963	1
316	TRUE	FALSE	DAP12 signaling.R-HSA-2424491	1
317	TRUE	FALSE	Cytosolic sulfonation of small molecules.R-HSA-156584	1
318	TRUE	FALSE	Cyclin D associated events in G1.R-HSA-69231	1
319	TRUE	FALSE	Biosynthesis of aspirin-triggered D-series resolvins.R-HSA-9020265	1
320	TRUE	FALSE	Biosynthesis of E-series 18(S)-resolvins.R-HSA-9018896	1
321	TRUE	FALSE	EGFR interacts with phospholipase C-gamma.R-HSA-212718	1
322	TRUE	FALSE	Abortive elongation of HIV-1 transcript in the absence of Tat.R-HSA-167242	1
323	TRUE	FALSE	Activation of caspases through apoptosome-mediated cleavage.R-HSA-111459	1
324	TRUE	FALSE	Activation of anterior HOX genes in hindbrain development during early embryogenesis.R-HSA-5617472	1
325	TRUE	FALSE	Activation of SMO.R-HSA-5635838	1
326	TRUE	FALSE	Activation of HOX genes during differentiation.R-HSA-5619507	1
327	TRUE	FALSE	Activation of GABAB receptors.R-HSA-991365	1
328	TRUE	FALSE	Activation of G protein gated Potassium channels.R-HSA-1296041	1
329	TRUE	FALSE	Activation of BMF and translocation to mitochondria.R-HSA-139910	1
330	TRUE	FALSE	Activation of BH3-only proteins.R-HSA-114452	1
331	TRUE	FALSE	Activation of BAD and translocation to mitochondria .R-HSA-111447	1
332	TRUE	FALSE	Activation of ATR in response to replication stress.R-HSA-176187	1
333	TRUE	FALSE	Activation of APC-C and APC-C:Cdc20 mediated degradation of mitotic proteins.R-HSA-176814	1
334	TRUE	FALSE	Activation of AMPK downstream of NMDARs.R-HSA-9619483	1
335	TRUE	FALSE	Activated NOTCH1 Transmits Signal to the Nucleus.R-HSA-2122948	1
336	TRUE	FALSE	AUF1 (hnRNP D0) binds and destabilizes mRNA.R-HSA-450408	1
337	TRUE	FALSE	Activation of kainate receptors upon glutamate binding.R-HSA-451326	1
338	TRUE	FALSE	ATF6 (ATF6-alpha) activates chaperones.R-HSA-381033	1
339	TRUE	FALSE	APC:Cdc20 mediated degradation of cell cycle proteins prior to satisfation of the cell cycle checkpoint.R-HSA-179419	1
340	TRUE	FALSE	APC-Cdc20 mediated degradation of Nek2A.R-HSA-179409	1
341	TRUE	FALSE	APC-C:Cdh1 mediated degradation of Cdc20 and other APC-C:Cdh1 targeted proteins in late mitosis-early G1.R-HSA-174178	1
342	TRUE	FALSE	APC-C:Cdc20 mediated degradation of mitotic proteins.R-HSA-176409	1
343	TRUE	FALSE	APC-C:Cdc20 mediated degradation of Securin.R-HSA-174154	1
344	TRUE	FALSE	APC-C:Cdc20 mediated degradation of Cyclin B.R-HSA-174048	1
345	TRUE	FALSE	APC-C-mediated degradation of cell cycle proteins.R-HSA-174143	1
346	TRUE	FALSE	ALKBH3 mediated reversal of alkylation damage.R-HSA-112126	1
347	TRUE	FALSE	AKT-mediated inactivation of FOXO1A.R-HSA-211163	1
348	TRUE	FALSE	AKT phosphorylates targets in the nucleus.R-HSA-198693	1
349	TRUE	FALSE	ADP signalling through P2Y purinoceptor 12.R-HSA-392170	1
350	TRUE	FALSE	ADP signalling through P2Y purinoceptor 1.R-HSA-418592	1
351	TRUE	FALSE	Activation of gene expression by SREBF (SREBP).R-HSA-2426168	1
352	TRUE	FALSE	Activation of the pre-replicative complex.R-HSA-68962	1
353	TRUE	FALSE	Biosynthesis of E-series 18(R)-resolvins.R-HSA-9023661	1
354	TRUE	FALSE	Arachidonic acid metabolism.R-HSA-2142753	1
355	TRUE	FALSE	Biosynthesis of DHA-derived sulfido conjugates.R-HSA-9026395	1
356	TRUE	FALSE	Biosynthesis of DHA-derived SPMs.R-HSA-9018677	1
357	TRUE	FALSE	Biosynthesis of D-series resolvins.R-HSA-9018676	1
358	TRUE	FALSE	Binding and entry of HIV virion.R-HSA-173107	1
359	TRUE	FALSE	Bicarbonate transporters.R-HSA-425381	1
360	TRUE	FALSE	Beta-oxidation of pristanoyl-CoA.R-HSA-389887	1
361	TRUE	FALSE	Autointegration results in viral DNA circles.R-HSA-177539	1
362	TRUE	FALSE	Autodegradation of Cdh1 by Cdh1:APC-C.R-HSA-174084	1
363	TRUE	FALSE	Association of TriC-CCT with target proteins during biosynthesis.R-HSA-390471	1
364	TRUE	FALSE	Assembly of the pre-replicative complex.R-HSA-68867	1
365	TRUE	FALSE	Assembly of the ORC complex at the origin of replication.R-HSA-68616	1
366	TRUE	FALSE	Assembly of collagen fibrils and other multimeric structures.R-HSA-2022090	1
367	TRUE	FALSE	Assembly of active LPL and LIPC lipase complexes.R-HSA-8963889	1
368	TRUE	FALSE	Aquaporin-mediated transport.R-HSA-445717	1
369	TRUE	FALSE	Acyl chain remodeling of CL.R-HSA-1482798	1
370	TRUE	FALSE	Apoptotic factor-mediated response.R-HSA-111471	1
371	TRUE	FALSE	Apoptotic execution phase.R-HSA-75153	1
372	TRUE	FALSE	Apoptosis induced DNA fragmentation.R-HSA-140342	1
373	TRUE	FALSE	Antiviral mechanism by IFN-stimulated genes.R-HSA-1169410	1
374	TRUE	FALSE	Antigen processing: Ubiquitination & Proteasome degradation.R-HSA-983168	1
375	TRUE	FALSE	Antigen activates B Cell Receptor (BCR) leading to generation of second messengers.R-HSA-983695	1
376	TRUE	FALSE	Androgen biosynthesis.R-HSA-193048	1
377	TRUE	FALSE	Amino acids regulate mTORC1.R-HSA-9639288	1
378	TRUE	FALSE	Amine Oxidase reactions.R-HSA-140179	1
379	TRUE	FALSE	Aggrephagy.R-HSA-9646399	1
380	TRUE	FALSE	Adrenaline,noradrenaline inhibits insulin secretion.R-HSA-400042	1
381	TRUE	FALSE	Adenylate cyclase inhibitory pathway.R-HSA-170670	1
382	TRUE	FALSE	Adenylate cyclase activating pathway.R-HSA-170660	1
383	TRUE	FALSE	E3 ubiquitin ligases ubiquitinate target proteins.R-HSA-8866654	1
384	TRUE	FALSE	Early Phase of HIV Life Cycle.R-HSA-162594	1
385	TRUE	FALSE	Mitotic Spindle Checkpoint.R-HSA-69618	1
386	TRUE	FALSE	Interactions of Tat with host cellular proteins.R-HSA-176034	1
387	TRUE	FALSE	Lysine catabolism.R-HSA-71064	1
388	TRUE	FALSE	Linoleic acid (LA) metabolism.R-HSA-2046105	1
389	TRUE	FALSE	Ligand-receptor interactions.R-HSA-5632681	1
390	TRUE	FALSE	KSRP (KHSRP) binds and destabilizes mRNA.R-HSA-450604	1
391	TRUE	FALSE	Iron uptake and transport.R-HSA-917937	1
392	TRUE	FALSE	Inwardly rectifying K+ channels.R-HSA-1296065	1
393	TRUE	FALSE	Invadopodia formation.R-HSA-8941237	1
394	TRUE	FALSE	Intrinsic Pathway for Apoptosis.R-HSA-109606	1
395	TRUE	FALSE	Intestinal infectious diseases.R-HSA-8942233	1
396	TRUE	FALSE	Interleukin-2 signaling.R-HSA-9020558	1
397	TRUE	FALSE	Interconversion of polyamines.R-HSA-351200	1
398	TRUE	FALSE	Interconversion of nucleotide di- and triphosphates.R-HSA-499943	1
399	TRUE	FALSE	Interactions of Vpr with host cellular proteins.R-HSA-176033	1
400	TRUE	FALSE	Interactions of Rev with host cellular proteins.R-HSA-177243	1
401	TRUE	FALSE	MAP3K8 (TPL2)-dependent MAPK1-3 activation.R-HSA-5684264	1
402	TRUE	FALSE	Integration of viral DNA into host genomic DNA.R-HSA-175567	1
403	TRUE	FALSE	Integration of provirus.R-HSA-162592	1
404	TRUE	FALSE	Integration of energy metabolism.R-HSA-163685	1
405	TRUE	FALSE	Insulin receptor signalling cascade.R-HSA-74751	1
406	TRUE	FALSE	Insulin receptor recycling.R-HSA-77387	1
407	TRUE	FALSE	Insulin processing.R-HSA-264876	1
408	TRUE	FALSE	Inhibition of the proteolytic activity of APC-C required for the onset of anaphase by mitotic spindle checkpoint components.R-HSA-141405	1
409	TRUE	FALSE	Inhibition of replication initiation of damaged DNA by RB1-E2F1.R-HSA-113501	1
410	TRUE	FALSE	Inhibition of nitric oxide production.R-HSA-9636249	1
411	TRUE	FALSE	Inhibition of Host mRNA Processing and RNA Silencing.R-HSA-168315	1
412	TRUE	FALSE	Inhibition of voltage gated Ca2+ channels via Gbeta-gamma subunits.R-HSA-997272	1
413	TRUE	FALSE	Influenza Viral RNA Transcription and Replication.R-HSA-168273	1
414	TRUE	FALSE	Influenza Infection.R-HSA-168255	1
415	TRUE	FALSE	Lysosome Vesicle Biogenesis.R-HSA-432720	1
416	TRUE	FALSE	MASTL Facilitates Mitotic Progression.R-HSA-2465910	1
417	TRUE	FALSE	Incretin synthesis, secretion, and inactivation.R-HSA-400508	1
418	TRUE	FALSE	Miscellaneous substrates.R-HSA-211958	1
419	TRUE	FALSE	Mitotic G2-G2-M phases.R-HSA-453274	1
420	TRUE	FALSE	Mitotic G1 phase and G1-S transition.R-HSA-453279	1
421	TRUE	FALSE	Mitochondrial translation.R-HSA-5368287	1
422	TRUE	FALSE	Mitochondrial translation termination.R-HSA-5419276	1
423	TRUE	FALSE	Mitochondrial translation initiation.R-HSA-5368286	1
424	TRUE	FALSE	Mitochondrial translation elongation.R-HSA-5389840	1
425	TRUE	FALSE	Mitochondrial protein import.R-HSA-1268020	1
426	TRUE	FALSE	Mitochondrial calcium ion transport.R-HSA-8949215	1
427	TRUE	FALSE	Mitochondrial biogenesis.R-HSA-1592230	1
428	TRUE	FALSE	Mismatch repair (MMR) directed by MSH2:MSH6 (MutSalpha).R-HSA-5358565	1
429	TRUE	FALSE	Mismatch repair (MMR) directed by MSH2:MSH3 (MutSbeta).R-HSA-5358606	1
430	TRUE	FALSE	Mismatch Repair.R-HSA-5358508	1
431	TRUE	FALSE	Miscellaneous transport and binding events.R-HSA-5223345	1
432	TRUE	FALSE	Metabolism of steroid hormones.R-HSA-196071	1
433	TRUE	FALSE	MECP2 regulates neuronal receptors and channels.R-HSA-9022699	1
434	TRUE	FALSE	Metabolism of polyamines.R-HSA-351202	1
435	TRUE	FALSE	Metabolism of nucleotides.R-HSA-15869	1
436	TRUE	FALSE	Metabolism of non-coding RNA.R-HSA-194441	1
437	TRUE	FALSE	Metabolism of ingested H2SeO4 and H2SeO3 into H2Se.R-HSA-2408550	1
438	TRUE	FALSE	Metabolism of cofactors.R-HSA-8978934	1
439	TRUE	FALSE	Metabolism of RNA.R-HSA-8953854	1
440	TRUE	FALSE	Meiotic recombination.R-HSA-912446	1
441	TRUE	FALSE	Meiosis.R-HSA-1500620	1
442	TRUE	FALSE	MET receptor recycling.R-HSA-8875656	1
443	TRUE	FALSE	MET activates STAT3.R-HSA-8875791	1
444	TRUE	FALSE	MET activates PTPN11.R-HSA-8865999	1
445	TRUE	FALSE	MECP2 regulates transcription of neuronal ligands.R-HSA-9022702	1
446	TRUE	FALSE	MECP2 regulates transcription of genes involved in GABA signaling.R-HSA-9022927	1
447	TRUE	FALSE	Infectious disease.R-HSA-5663205	1
448	TRUE	FALSE	Inactivation of CDC42 and RAC1.R-HSA-428543	1
449	TRUE	FALSE	Electron transport from NADPH to Ferredoxin.R-HSA-2395516	1
450	TRUE	FALSE	G alpha (z) signalling events.R-HSA-418597	1
451	TRUE	FALSE	G2-M Transition.R-HSA-69275	1
452	TRUE	FALSE	G2-M DNA damage checkpoint.R-HSA-69473	1
453	TRUE	FALSE	G2-M Checkpoints.R-HSA-69481	1
454	TRUE	FALSE	G2 Phase.R-HSA-68911	1
455	TRUE	FALSE	G1-S-Specific Transcription.R-HSA-69205	1
456	TRUE	FALSE	G1-S Transition.R-HSA-69206	1
457	TRUE	FALSE	G1 Phase.R-HSA-69236	1
458	TRUE	FALSE	G0 and Early G1.R-HSA-1538133	1
459	TRUE	FALSE	G-protein activation.R-HSA-202040	1
460	TRUE	FALSE	G protein gated Potassium channels.R-HSA-1296059	1
461	TRUE	FALSE	G beta:gamma signalling through PLC beta.R-HSA-418217	1
462	TRUE	FALSE	G beta:gamma signalling through CDC42.R-HSA-8964616	1
463	TRUE	FALSE	G beta:gamma signalling through BTK.R-HSA-8964315	1
464	TRUE	FALSE	G alpha (12-13) signalling events.R-HSA-416482	1
465	TRUE	FALSE	GABA receptor activation.R-HSA-977443	1
466	TRUE	FALSE	Formation of selenosugars for excretion.R-HSA-2408499	1
467	TRUE	FALSE	Formation of Senescence-Associated Heterochromatin Foci (SAHF).R-HSA-2559584	1
468	TRUE	FALSE	Formation of RNA Pol II elongation complex .R-HSA-112382	1
469	TRUE	FALSE	Fatty acyl-CoA biosynthesis.R-HSA-75105	1
470	TRUE	FALSE	Fatty acids.R-HSA-211935	1
471	TRUE	FALSE	Fatty acid metabolism.R-HSA-8978868	1
472	TRUE	FALSE	FGFR2b ligand binding and activation.R-HSA-190377	1
473	TRUE	FALSE	FCGR activation.R-HSA-2029481	1
474	TRUE	FALSE	Extracellular matrix organization.R-HSA-1474244	1
475	TRUE	FALSE	Export of Viral Ribonucleoproteins from Nucleus.R-HSA-168274	1
476	TRUE	FALSE	Erythropoietin activates Phospholipase C gamma (PLCG).R-HSA-9027277	1
477	TRUE	FALSE	Energy dependent regulation of mTOR by LKB1-AMPK.R-HSA-380972	1
478	TRUE	FALSE	Endosomal Sorting Complex Required For Transport (ESCRT).R-HSA-917729	1
479	TRUE	FALSE	GABA B receptor activation.R-HSA-977444	1
480	TRUE	FALSE	GABA synthesis, release, reuptake and degradation.R-HSA-888590	1
481	TRUE	FALSE	Inactivation of APC-C via direct inhibition of the APC-C complex.R-HSA-141430	1
482	TRUE	FALSE	HIV Infection.R-HSA-162906	1
483	TRUE	FALSE	Immune System.R-HSA-168256	1
484	TRUE	FALSE	ISG15 antiviral mechanism.R-HSA-1169408	1
485	TRUE	FALSE	IRS-mediated signalling.R-HSA-112399	1
486	TRUE	FALSE	IRS activation.R-HSA-74713	1
487	TRUE	FALSE	IRF3-mediated induction of type I IFN.R-HSA-3270619	1
488	TRUE	FALSE	IRAK1 recruits IKK complex.R-HSA-937039	1
489	TRUE	FALSE	IRAK1 recruits IKK complex upon TLR7-8 or 9 stimulation.R-HSA-975144	1
490	TRUE	FALSE	Hypusine synthesis from eIF5A-lysine.R-HSA-204626	1
491	TRUE	FALSE	Hydrolysis of LPC.R-HSA-1483115	1
492	TRUE	FALSE	Host Interactions of HIV factors.R-HSA-162909	1
493	TRUE	FALSE	Hormone ligand-binding receptors.R-HSA-375281	1
494	TRUE	FALSE	Histidine catabolism.R-HSA-70921	1
495	TRUE	FALSE	HIV elongation arrest and recovery.R-HSA-167287	1
496	TRUE	FALSE	HDR through MMEJ (alt-NHEJ).R-HSA-5685939	1
497	TRUE	FALSE	GLI proteins bind promoters of Hh responsive genes to promote transcription.R-HSA-5635851	1
498	TRUE	FALSE	HCMV Late Events.R-HSA-9610379	1
499	TRUE	FALSE	HCMV Early Events.R-HSA-9609690	1
500	TRUE	FALSE	Growth hormone receptor signaling.R-HSA-982772	1
501	TRUE	FALSE	Glyoxylate metabolism and glycine degradation.R-HSA-389661	1
502	TRUE	FALSE	Glycine degradation.R-HSA-6783984	1
503	TRUE	FALSE	Glycerophospholipid catabolism.R-HSA-6814848	1
504	TRUE	FALSE	Glycerophospholipid biosynthesis.R-HSA-1483206	1
505	TRUE	FALSE	Glucose metabolism.R-HSA-70326	1
506	TRUE	FALSE	Gluconeogenesis.R-HSA-70263	1
507	TRUE	FALSE	Glucagon signaling in metabolic regulation.R-HSA-163359	1
508	TRUE	FALSE	Generation of second messenger molecules.R-HSA-202433	1
509	TRUE	FALSE	Gap junction trafficking.R-HSA-190828	1
510	TRUE	FALSE	Gap junction assembly.R-HSA-190861	1
511	FALSE	TRUE	mRNA Editing: A to I Conversion.R-HSA-75064	1
