# Supplementary material for: Defining the progeria phenome
Source: Aging (Albany NY). 2024 Feb 9;16(3):2026–46. doi: 10.18632/aging.205537 (PMC10911340; doi:10.18632/aging.205537)
Supplement: Supplementary Table 4 [file aging-16-205537-s005.xls]

## Sheet: group_4_overlap_up_pathways
Supplementary Table 4. Gene expression pathway analysis of Seckel syndrome, Nestor-Guillermo progeria and dyskeratosis congenita.
	Nestor-Guillermo progeria	Seckel syndrome	id	num
0	TRUE	TRUE	Signalling to ERK5.R-HSA-198765	2
1	TRUE	FALSE	Acyl chain remodeling of CL.R-HSA-1482798	1
2	TRUE	FALSE	Acyl chain remodelling of PC.R-HSA-1482788	1
3	TRUE	FALSE	Metabolism of ingested H2SeO4 and H2SeO3 into H2Se.R-HSA-2408550	1
4	TRUE	FALSE	Metabolism of lipids.R-HSA-556833	1
5	TRUE	FALSE	Neurophilin interactions with VEGF and VEGFR.R-HSA-194306	1
6	TRUE	FALSE	Non-integrin membrane-ECM interactions.R-HSA-3000171	1
7	TRUE	FALSE	Organic anion transport.R-HSA-561048	1
8	TRUE	FALSE	Purine catabolism.R-HSA-74259	1
9	TRUE	FALSE	Sulfide oxidation to sulfate.R-HSA-1614517	1
10	TRUE	FALSE	Syndecan interactions.R-HSA-3000170	1
11	TRUE	FALSE	Synthesis of 12-eicosatetraenoic acid derivatives.R-HSA-2142712	1
12	TRUE	FALSE	Synthesis of 15-eicosatetraenoic acid derivatives.R-HSA-2142770	1
13	TRUE	FALSE	Synthesis of 5-eicosatetraenoic acids.R-HSA-2142688	1
14	TRUE	FALSE	Synthesis of PG.R-HSA-1483148	1
15	TRUE	FALSE	Synthesis of PS.R-HSA-1483101	1
16	TRUE	FALSE	Vitamin B5 (pantothenate) metabolism.R-HSA-199220	1
17	TRUE	FALSE	phospho-PLA2 pathway.R-HSA-111995	1
18	FALSE	TRUE	Events associated with phagocytolytic activity of PMN cells.R-HSA-8941413	1
19	TRUE	FALSE	Lysine catabolism.R-HSA-71064	1
20	TRUE	FALSE	Invadopodia formation.R-HSA-8941237	1
21	TRUE	FALSE	IRAK2 mediated activation of TAK1 complex.R-HSA-937042	1
22	TRUE	FALSE	Biosynthesis of EPA-derived SPMs.R-HSA-9018679	1
23	TRUE	FALSE	Acyl chain remodelling of PE.R-HSA-1482839	1
24	TRUE	FALSE	Alternative complement activation.R-HSA-173736	1
25	TRUE	FALSE	Biosynthesis of D-series resolvins.R-HSA-9018676	1
26	TRUE	FALSE	Biosynthesis of DHA-derived SPMs.R-HSA-9018677	1
27	TRUE	FALSE	Biosynthesis of DHA-derived sulfido conjugates.R-HSA-9026395	1
28	TRUE	FALSE	Biosynthesis of E-series 18(R)-resolvins.R-HSA-9023661	1
29	TRUE	FALSE	Biosynthesis of E-series 18(S)-resolvins.R-HSA-9018896	1
30	TRUE	FALSE	Biosynthesis of aspirin-triggered D-series resolvins.R-HSA-9020265	1
31	TRUE	FALSE	IRAK2 mediated activation of TAK1 complex upon TLR7-8 or 9 stimulation.R-HSA-975163	1
32	TRUE	FALSE	Biosynthesis of protectin and resolvin conjugates in tissue regeneration (PCTR and RCTR).R-HSA-9026766	1
33	TRUE	FALSE	Biosynthesis of specialized proresolving mediators (SPMs).R-HSA-9018678	1
34	TRUE	FALSE	Coenzyme A biosynthesis.R-HSA-196783	1
35	TRUE	FALSE	ECM proteoglycans.R-HSA-3000178	1
36	TRUE	FALSE	Formation of selenosugars for excretion.R-HSA-2408499	1
37	TRUE	FALSE	Glycerophospholipid catabolism.R-HSA-6814848	1
38	TRUE	FALSE	Hydrolysis of LPC.R-HSA-1483115	1
39	FALSE	TRUE	Transfer of LPS from LBP carrier to CD14.R-HSA-166020	1

## Sheet: down
	Nestor-Guillermo progeria	Seckel syndrome	id	num
0	TRUE	FALSE	ATF6 (ATF6-alpha) activates chaperones.R-HSA-381033	1
1	TRUE	FALSE	Activated NTRK3 signals through PLCG1.R-HSA-9034793	1
2	TRUE	FALSE	Signaling by NTRK3 (TRKC).R-HSA-9034015	1
3	TRUE	FALSE	Synthesis of (16-20)-hydroxyeicosatetraenoic acids (HETE).R-HSA-2142816	1
4	TRUE	FALSE	TCF dependent signaling in response to WNT.R-HSA-201681	1
5	TRUE	FALSE	TET1,2,3 and TDG demethylate DNA.R-HSA-5221030	1
6	TRUE	FALSE	TFAP2 (AP-2) family regulates transcription of other transcription factors.R-HSA-8866906	1
7	TRUE	FALSE	TRAF6 mediated IRF7 activation.R-HSA-933541	1
8	TRUE	FALSE	Unfolded Protein Response (UPR).R-HSA-381119	1
9	TRUE	FALSE	Urea cycle.R-HSA-70635	1
10	TRUE	FALSE	Vitamin D (calciferol) metabolism.R-HSA-196791	1
11	TRUE	FALSE	rRNA processing in the mitochondrion.R-HSA-8868766	1
12	TRUE	FALSE	tRNA processing in the mitochondrion.R-HSA-6785470	1
13	FALSE	TRUE	ALKBH2 mediated reversal of alkylation damage.R-HSA-112122	1
14	FALSE	TRUE	Metabolism of Angiotensinogen to Angiotensins.R-HSA-2022377	1
15	FALSE	TRUE	NFG and proNGF binds to p75NTR.R-HSA-205017	1
16	FALSE	TRUE	Receptor Mediated Mitophagy.R-HSA-8934903	1
17	TRUE	FALSE	Scavenging by Class H Receptors.R-HSA-3000497	1
18	TRUE	FALSE	Release of apoptotic factors from the mitochondria.R-HSA-111457	1
19	TRUE	FALSE	Regulation of TLR by endogenous ligand.R-HSA-5686938	1
20	TRUE	FALSE	Interferon Signaling.R-HSA-913531	1
21	TRUE	FALSE	Beta-oxidation of pristanoyl-CoA.R-HSA-389887	1
22	TRUE	FALSE	Binding of TCF-LEF:CTNNB1 to target gene promoters.R-HSA-4411364	1
23	TRUE	FALSE	Carnitine synthesis.R-HSA-71262	1
24	TRUE	FALSE	Fatty acids.R-HSA-211935	1
25	TRUE	FALSE	HDL remodeling.R-HSA-8964058	1
26	TRUE	FALSE	Inhibition of Host mRNA Processing and RNA Silencing.R-HSA-168315	1
27	TRUE	FALSE	Interleukin-1 family signaling.R-HSA-446652	1
28	TRUE	FALSE	RUNX3 regulates WNT signaling.R-HSA-8951430	1
29	TRUE	FALSE	Interleukin-36 pathway.R-HSA-9014826	1
30	TRUE	FALSE	Mitochondrial transcription termination.R-HSA-163316	1
31	TRUE	FALSE	Nitric oxide stimulates guanylate cyclase.R-HSA-392154	1
32	TRUE	FALSE	PCP-CE pathway.R-HSA-4086400	1
33	TRUE	FALSE	Plasma lipoprotein remodeling.R-HSA-8963899	1
34	TRUE	FALSE	RET signaling.R-HSA-8853659	1
35	FALSE	TRUE	Synthesis of Lipoxins (LX).R-HSA-2142700	1
